# Supplementary material for: Accuracy of rapid point-of-care antigen-based diagnostics for SARS-CoV-2: An updated systematic review and meta-analysis with meta-regression analyzing influencing factors
Source: PubMed Central journal article supplement (PMC9187092; doi:10.1371/journal.pmed.1004011), 2022-05-26

## S1 Fig. Forest plots of all Ag-RDTs.

Caption: TP = true positive; FP = false positive; FN = false negative; TN = true negative; CI = confidence interval

### ActiveXpress

| Author, Study ID | Sample size | TP | FN | TN | FP | Sensitivity [95%CI] | Specificity [95%CI] |
|------------------|-------------|----|----|----|----|---------------------|---------------------|
|------------------|-------------|----|----|----|----|---------------------|---------------------|

|                |     |    |    |    |   |                   |                   |
|----------------|-----|----|----|----|---|-------------------|-------------------|
| FINDDx, f176.1 | 120 | 33 | 21 | 66 | 0 | 0.61 [0.47, 0.74] | 1.00 [0.95, 1.00] |
|----------------|-----|----|----|----|---|-------------------|-------------------|

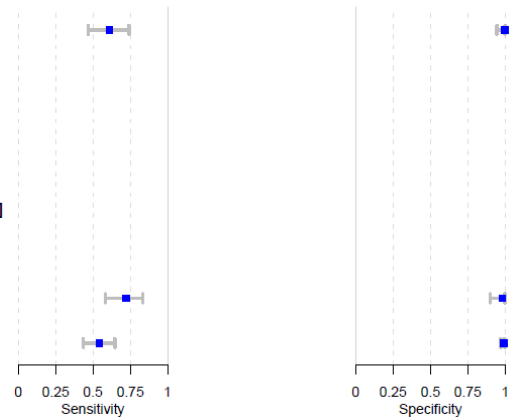

### Genedia

| Author, Study ID | Sample size | TP | FN | TN | FP | Sensitivity [95%CI] | Specificity [95%CI] |
|------------------|-------------|----|----|----|----|---------------------|---------------------|
|------------------|-------------|----|----|----|----|---------------------|---------------------|

|                |     |    |    |    |   |                   |                   |
|----------------|-----|----|----|----|---|-------------------|-------------------|
| FINDDx, f177.2 | 108 | 39 | 15 | 53 | 1 | 0.72 [0.58, 0.84] | 0.98 [0.90, 1.00] |
|----------------|-----|----|----|----|---|-------------------|-------------------|

|                |     |    |    |     |   |                   |                   |
|----------------|-----|----|----|-----|---|-------------------|-------------------|
| FINDDx, f177.1 | 391 | 50 | 42 | 296 | 3 | 0.54 [0.44, 0.65] | 0.99 [0.97, 1.00] |
|----------------|-----|----|----|-----|---|-------------------|-------------------|

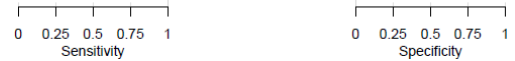

### BD Veritor

| Author, Study ID | Sample size | TP | FN | TN | FP | Sensitivity [95%CI] | Specificity [95%CI] |
|------------------|-------------|----|----|----|----|---------------------|---------------------|
|------------------|-------------|----|----|----|----|---------------------|---------------------|

|               |     |    |   |     |   |                   |                   |
|---------------|-----|----|---|-----|---|-------------------|-------------------|
| Pekosz, a28.1 | 251 | 27 | 1 | 220 | 3 | 0.96 [0.82, 1.00] | 0.99 [0.96, 1.00] |
|---------------|-----|----|---|-----|---|-------------------|-------------------|

|              |     |    |   |     |   |                   |                   |
|--------------|-----|----|---|-----|---|-------------------|-------------------|
| Young, a43.1 | 251 | 29 | 9 | 212 | 1 | 0.76 [0.60, 0.89] | 1.00 [0.97, 1.00] |
|--------------|-----|----|---|-----|---|-------------------|-------------------|

|                |     |    |    |     |   |                   |                   |
|----------------|-----|----|----|-----|---|-------------------|-------------------|
| Caruana, f34.4 | 532 | 47 | 67 | 417 | 1 | 0.41 [0.32, 0.51] | 1.00 [0.99, 1.00] |
|----------------|-----|----|----|-----|---|-------------------|-------------------|

|               |      |     |    |      |   |                   |                   |
|---------------|------|-----|----|------|---|-------------------|-------------------|
| Schuit, f64.1 | 2678 | 149 | 84 | 2436 | 9 | 0.64 [0.57, 0.70] | 1.00 [0.99, 1.00] |
|---------------|------|-----|----|------|---|-------------------|-------------------|

|              |      |    |    |      |    |                   |                   |
|--------------|------|----|----|------|----|-------------------|-------------------|
| Kilic, f71.1 | 1384 | 77 | 39 | 1253 | 15 | 0.66 [0.57, 0.75] | 0.99 [0.98, 0.99] |
|--------------|------|----|----|------|----|-------------------|-------------------|

|                     |     |    |   |     |   |                   |                   |
|---------------------|-----|----|---|-----|---|-------------------|-------------------|
| Christensen, f109.1 | 278 | 52 | 8 | 217 | 1 | 0.87 [0.75, 0.94] | 1.00 [0.98, 1.00] |
|---------------------|-----|----|---|-----|---|-------------------|-------------------|

|               |     |     |    |     |   |                   |                   |
|---------------|-----|-----|----|-----|---|-------------------|-------------------|
| Karon, f148.1 | 347 | 131 | 66 | 150 | 0 | 0.66 [0.59, 0.73] | 1.00 [0.98, 1.00] |
|---------------|-----|-----|----|-----|---|-------------------|-------------------|

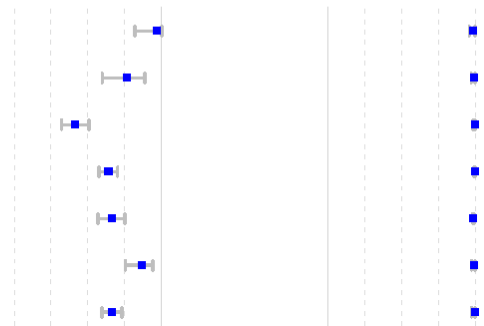

**BinaxNow**

| Author, Study ID    | Sample size | TP   | FN   | TN    | FP  | Sensitivity [95%CI] | Specificity [95%CI] |
|---------------------|-------------|------|------|-------|-----|---------------------|---------------------|
| Pilarowski, a29.1   | 878         | 15   | 11   | 852   | 0   | 0.58 [0.37, 0.77]   | 1.00 [1.00, 1.00]   |
| Pollock, f17.1      | 2308        | 226  | 66   | 2004  | 12  | 0.77 [0.72, 0.82]   | 0.99 [0.99, 1.00]   |
| James, f23.1        | 2339        | 86   | 66   | 2184  | 3   | 0.57 [0.48, 0.65]   | 1.00 [1.00, 1.00]   |
| Okoye, f51.1        | 2638        | 24   | 21   | 2593  | 0   | 0.53 [0.38, 0.68]   | 1.00 [1.00, 1.00]   |
| Shaikh, f105.1      | 199         | 33   | 6    | 146   | 14  | 0.85 [0.70, 0.94]   | 0.91 [0.86, 0.95]   |
| Shah, f133.1        | 2110        | 272  | 62   | 1769  | 7   | 0.81 [0.77, 0.86]   | 1.00 [0.99, 1.00]   |
| Frediani, f139.5    | 297         | 57   | 20   | 218   | 2   | 0.74 [0.63, 0.83]   | 0.99 [0.97, 1.00]   |
| Bachmann, f154.3    | 169         | 89   | 20   | 60    | 0   | 0.82 [0.73, 0.88]   | 1.00 [0.94, 1.00]   |
| Bachmann, f154.6    | 169         | 84   | 8    | 72    | 5   | 0.91 [0.84, 0.96]   | 0.94 [0.86, 0.98]   |
| Tinker, f156.1      | 1540        | 8    | 32   | 1500  | 0   | 0.20 [0.09, 0.36]   | 1.00 [1.00, 1.00]   |
| Allan-Blitz, f161.1 | 18457       | 1550 | 1603 | 15115 | 189 | 0.49 [0.47, 0.51]   | 0.99 [0.99, 0.99]   |

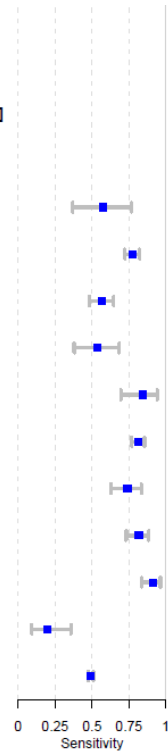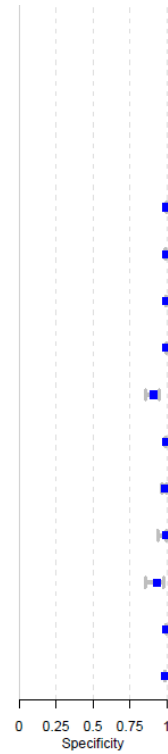

**Bioeasy**

| Author, Study ID     | Sample size | TP | FN | TN  | FP | Sensitivity [95%CI] | Specificity [95%CI] |
|----------------------|-------------|----|----|-----|----|---------------------|---------------------|
| Porte, a31.1         | 127         | 77 | 5  | 45  | 0  | 0.94 [0.86, 0.98]   | 1.00 [0.92, 1.00]   |
| Weitzel, a41.4       | 111         | 68 | 12 | 31  | 0  | 0.85 [0.75, 0.92]   | 1.00 [0.89, 1.00]   |
| Parada-Ricart, a58.1 | 172         | 19 | 7  | 125 | 21 | 0.73 [0.52, 0.88]   | 0.86 [0.79, 0.91]   |

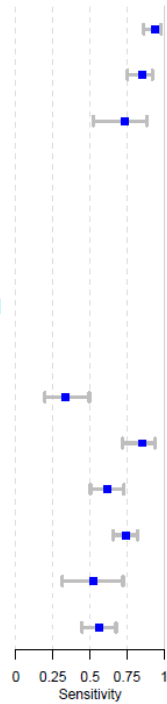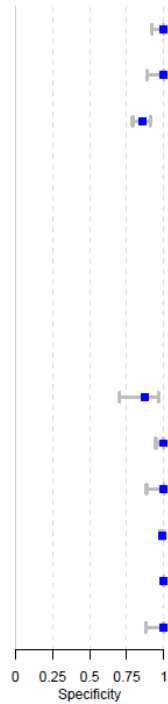

**Rapigen**

| Author, Study ID    | Sample size | TP | FN | TN   | FP | Sensitivity [95%CI] | Specificity [95%CI] |
|---------------------|-------------|----|----|------|----|---------------------|---------------------|
| Schildgen, a33.1    | 73          | 14 | 28 | 27   | 4  | 0.33 [0.20, 0.50]   | 0.87 [0.70, 0.96]   |
| Shrestha, a36.1     | 113         | 40 | 7  | 66   | 0  | 0.85 [0.72, 0.94]   | 1.00 [0.95, 1.00]   |
| Weitzel, a41.1      | 109         | 49 | 30 | 30   | 0  | 0.62 [0.50, 0.73]   | 1.00 [0.88, 1.00]   |
| FINDDx, a62.1       | 476         | 87 | 30 | 355  | 4  | 0.74 [0.66, 0.82]   | 0.99 [0.97, 1.00]   |
| FINDDx, a62.2       | 1239        | 13 | 12 | 1214 | 0  | 0.52 [0.31, 0.72]   | 1.00 [1.00, 1.00]   |
| Shidlovskaya, f61.1 | 106         | 44 | 34 | 28   | 0  | 0.56 [0.45, 0.68]   | 1.00 [0.88, 1.00]   |

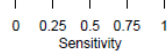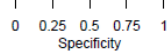

**Bio-Rad**

Author, Study ID Sample size TP FN TN FP Sensitivity [95%CI] Specificity [95%CI]

Blairon, f113.2 199 90 60 49 0 0.60 [0.52, 0.68] 1.00 [0.93, 1.00]

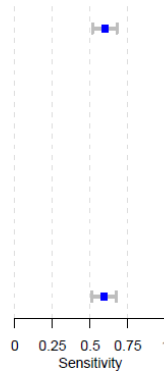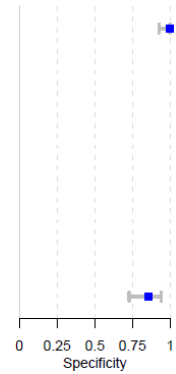

**NovaGen**

Author, Study ID Sample size TP FN TN FP Sensitivity [95%CI] Specificity [95%CI]

Blairon, f113.1 199 89 61 42 7 0.59 [0.51, 0.67] 0.86 [0.73, 0.94]

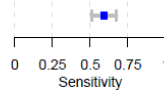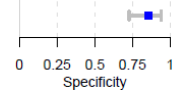

**Biotical**

Author, Study ID Sample size TP FN TN FP Sensitivity [95%CI] Specificity [95%CI]

Favresse, f31.1 188 64 32 91 1 0.67 [0.56, 0.76] 0.99 [0.94, 1.00]

Van Honacker, f143.2 98 39 19 40 0 0.67 [0.54, 0.79] 1.00 [0.91, 1.00]

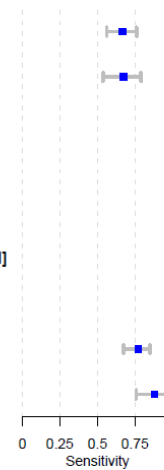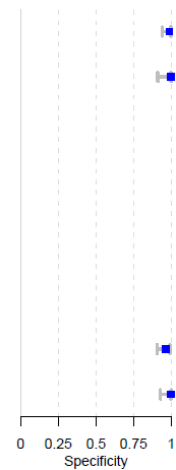

**Healgen**

Author, Study ID Sample size TP FN TN FP Sensitivity [95%CI] Specificity [95%CI]

Favresse, f31.3 188 74 22 89 3 0.77 [0.67, 0.85] 0.97 [0.91, 0.99]

Seynaeve, f137.1 100 44 6 50 0 0.88 [0.76, 0.96] 1.00 [0.93, 1.00]

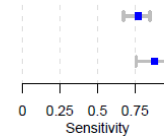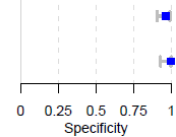

**CerTest**

Author, Study ID Sample size TP FN TN FP Sensitivity [95%CI] Specificity [95%CI]

Pérez-García, f52.1 320 91 79 150 0 0.54 [0.46, 0.61] 1.00 [0.98, 1.00]

Koeleman, f103.3 80 22 18 39 1 0.55 [0.38, 0.71] 0.98 [0.87, 1.00]

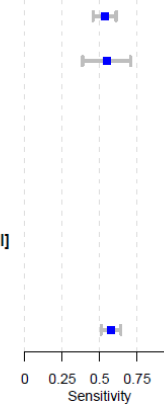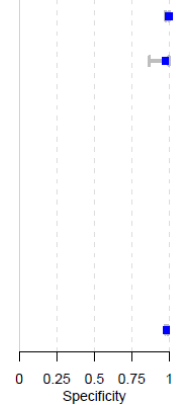

**CareStart**

Author, Study ID Sample size TP FN TN FP Sensitivity [95%CI] Specificity [95%CI]

Pollock, f59.1 1498 135 99 1243 21 0.58 [0.51, 0.64] 0.98 [0.98, 0.99]

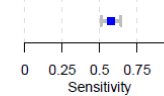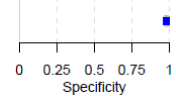

**Ecotest**

**Author, Study ID    Sample size    TP    FN    TN    FP    Sensitivity [95%CI]    Specificity [95%CI]**

|              |     |     |    |     |   |                   |                   |
|--------------|-----|-----|----|-----|---|-------------------|-------------------|
| Homza, f87.1 | 318 | 81  | 26 | 204 | 7 | 0.76 [0.66, 0.84] | 0.97 [0.93, 0.99] |
| Homza, f99.1 | 494 | 125 | 39 | 321 | 9 | 0.76 [0.69, 0.82] | 0.97 [0.95, 0.99] |

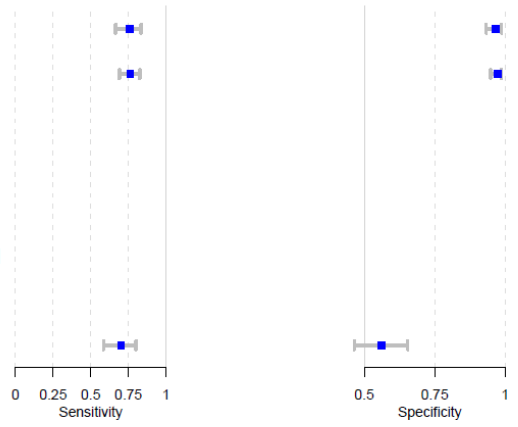

**ND COVID**

**Author, Study ID    Sample size    TP    FN    TN    FP    Sensitivity [95%CI]    Specificity [95%CI]**

|              |     |    |    |    |    |                   |                   |
|--------------|-----|----|----|----|----|-------------------|-------------------|
| Homza, f87.3 | 191 | 54 | 23 | 64 | 50 | 0.70 [0.59, 0.80] | 0.56 [0.47, 0.65] |
|--------------|-----|----|----|----|----|-------------------|-------------------|

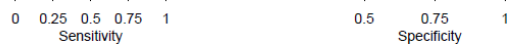

**Encode**

**Author, Study ID    Sample size    TP    FN    TN    FP    Sensitivity [95%CI]    Specificity [95%CI]**

|                  |     |    |    |     |   |                   |                   |
|------------------|-----|----|----|-----|---|-------------------|-------------------|
| Pickering, f73.5 | 200 | 74 | 26 | 100 | 0 | 0.74 [0.64, 0.82] | 1.00 [0.96, 1.00] |
|------------------|-----|----|----|-----|---|-------------------|-------------------|

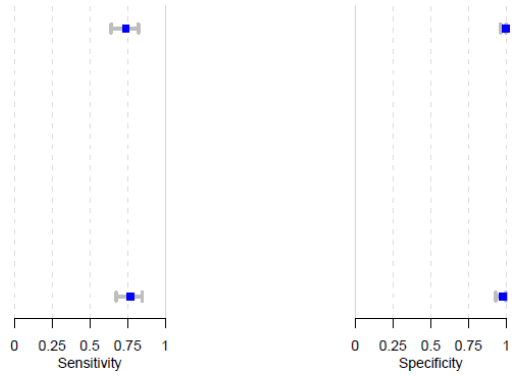

**Spring**

**Author, Study ID    Sample size    TP    FN    TN    FP    Sensitivity [95%CI]    Specificity [95%CI]**

|                  |     |    |    |    |   |                   |                   |
|------------------|-----|----|----|----|---|-------------------|-------------------|
| Pickering, f73.4 | 200 | 77 | 23 | 98 | 2 | 0.77 [0.68, 0.85] | 0.98 [0.93, 1.00] |
|------------------|-----|----|----|----|---|-------------------|-------------------|

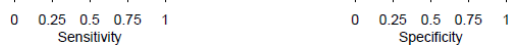

**Espline**

**Author, Study ID    Sample size    TP    FN    TN    FP    Sensitivity [95%CI]    Specificity [95%CI]**

|               |     |    |    |     |   |                   |                   |
|---------------|-----|----|----|-----|---|-------------------|-------------------|
| Takeda, a50.1 | 162 | 50 | 12 | 100 | 0 | 0.81 [0.69, 0.90] | 1.00 [0.96, 1.00] |
| Sberna, f83.1 | 136 | 5  | 57 | 74  | 0 | 0.08 [0.03, 0.18] | 1.00 [0.95, 1.00] |
| FINDDx, f92.1 | 723 | 88 | 24 | 611 | 0 | 0.79 [0.70, 0.86] | 1.00 [0.99, 1.00] |

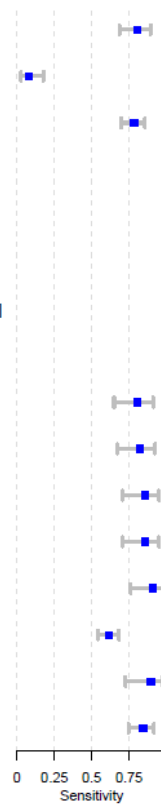

**Standard Q nasal**

**Author, Study ID    Sample size    TP    FN    TN    FP    Sensitivity [95%CI]    Specificity [95%CI]**

|                 |      |     |    |      |   |                   |                   |
|-----------------|------|-----|----|------|---|-------------------|-------------------|
| Lindner, a53.2  | 179  | 33  | 8  | 136  | 2 | 0.80 [0.65, 0.91] | 0.99 [0.95, 1.00] |
| Lindner, f15.2  | 144  | 33  | 7  | 104  | 0 | 0.82 [0.67, 0.93] | 1.00 [0.96, 1.00] |
| Nikolai, f35.1  | 132  | 31  | 5  | 96   | 0 | 0.86 [0.70, 0.95] | 1.00 [0.96, 1.00] |
| Nikolai, f35.2  | 132  | 31  | 5  | 96   | 0 | 0.86 [0.70, 0.95] | 1.00 [0.96, 1.00] |
| Nikolai, f35.4  | 96   | 31  | 3  | 61   | 1 | 0.91 [0.76, 0.98] | 0.98 [0.91, 1.00] |
| Stohr, f45.2    | 1588 | 118 | 74 | 1392 | 4 | 0.62 [0.54, 0.68] | 1.00 [0.99, 1.00] |
| Agarwal, f153.1 | 467  | 26  | 3  | 436  | 2 | 0.90 [0.73, 0.98] | 1.00 [0.98, 1.00] |
| FINDDx, f182.2  | 214  | 66  | 12 | 135  | 1 | 0.85 [0.75, 0.92] | 0.99 [0.96, 1.00] |

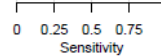

**Exdia**

**Author, Study ID    Sample size    TP    FN    TN    FP    Sensitivity [95%CI]    Specificity [95%CI]**

|                |     |    |    |     |   |                   |                   |
|----------------|-----|----|----|-----|---|-------------------|-------------------|
| Caruana, f34.3 | 532 | 55 | 59 | 416 | 2 | 0.48 [0.39, 0.58] | 1.00 [0.98, 1.00] |
|----------------|-----|----|----|-----|---|-------------------|-------------------|

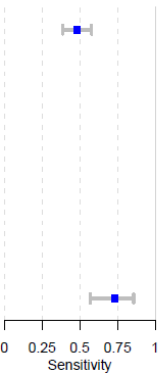

**Ichroma**

**Author, Study ID    Sample size    TP    FN    TN    FP    Sensitivity [95%CI]    Specificity [95%CI]**

|               |     |    |    |     |   |                   |                   |
|---------------|-----|----|----|-----|---|-------------------|-------------------|
| FINDDx, f39.1 | 232 | 30 | 11 | 191 | 0 | 0.73 [0.57, 0.86] | 1.00 [0.98, 1.00] |
|---------------|-----|----|----|-----|---|-------------------|-------------------|

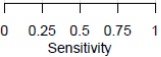

**Flowflex LF**

**Author, Study ID Sample size TP FN TN FP Sensitivity [95%CI] Specificity [95%CI]**

|                |     |     |    |     |   |                   |                   |
|----------------|-----|-----|----|-----|---|-------------------|-------------------|
| Karon, f148.4  | 347 | 153 | 44 | 146 | 4 | 0.78 [0.71, 0.83] | 0.97 [0.93, 0.99] |
| FINDdx, f175.1 | 279 | 58  | 5  | 215 | 1 | 0.92 [0.82, 0.97] | 1.00 [0.97, 1.00] |

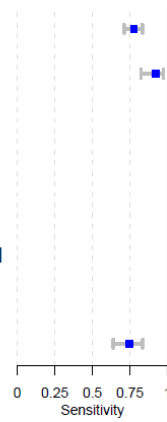

**QuickChaser**

**Author, Study ID Sample size TP FN TN FP Sensitivity [95%CI] Specificity [95%CI]**

|                  |      |    |    |      |   |                   |                   |
|------------------|------|----|----|------|---|-------------------|-------------------|
| Kurihara, f152.1 | 1401 | 62 | 21 | 1316 | 2 | 0.75 [0.64, 0.84] | 1.00 [1.00, 1.00] |
|------------------|------|----|----|------|---|-------------------|-------------------|

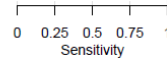

**Frend**

**Author, Study ID Sample size TP FN TN FP Sensitivity [95%CI] Specificity [95%CI]**

|              |     |    |   |    |   |                   |                   |
|--------------|-----|----|---|----|---|-------------------|-------------------|
| Orsi, f191.1 | 110 | 56 | 4 | 50 | 0 | 0.93 [0.84, 0.98] | 1.00 [0.93, 1.00] |
|--------------|-----|----|---|----|---|-------------------|-------------------|



**RapidTesta**

**Author, Study ID Sample size TP FN TN FP Sensitivity [95%CI] Specificity [95%CI]**

|                |      |    |    |      |    |                   |                   |
|----------------|------|----|----|------|----|-------------------|-------------------|
| Suzuki, f194.2 | 1127 | 58 | 16 | 1028 | 25 | 0.78 [0.67, 0.87] | 0.98 [0.96, 0.98] |
| Suzuki, f194.1 | 1127 | 53 | 21 | 1045 | 8  | 0.72 [0.60, 0.81] | 0.99 [0.98, 1.00] |

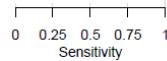

**GenBody**

**Author, Study ID Sample size TP FN TN FP Sensitivity [95%CI] Specificity [95%CI]**

|             |     |    |   |     |   |                   |                   |
|-------------|-----|----|---|-----|---|-------------------|-------------------|
| Kim, f186.1 | 130 | 27 | 3 | 98  | 2 | 0.90 [0.74, 0.98] | 0.98 [0.93, 1.00] |
| Kim, f186.2 | 200 | 94 | 6 | 100 | 0 | 0.94 [0.87, 0.98] | 1.00 [0.96, 1.00] |

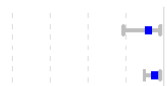

**NG Biotech**

**Author, Study ID Sample size TP FN TN FP Sensitivity [95%CI] Specificity [95%CI]**

|                 |     |    |     |     |   |                   |                   |
|-----------------|-----|----|-----|-----|---|-------------------|-------------------|
| Fourati, f190.5 | 634 | 97 | 200 | 332 | 5 | 0.33 [0.27, 0.38] | 0.98 [0.97, 1.00] |
|-----------------|-----|----|-----|-----|---|-------------------|-------------------|

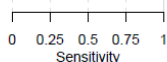

**Hotgen**

Author, Study ID Sample size TP FN TN FP Sensitivity [95%CI] Specificity [95%CI]

FINDDx, f178.1 454 94 12 348 0 0.89 [0.81, 0.94] 1.00 [0.99, 1.00]

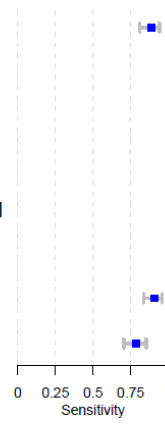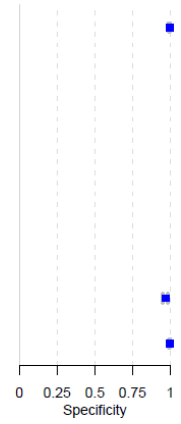

**Sure Status**

Author, Study ID Sample size TP FN TN FP Sensitivity [95%CI] Specificity [95%CI]

FINDDx, f180.1 519 91 9 407 12 0.91 [0.84, 0.96] 0.97 [0.95, 0.98]

FINDDx, f180.2 997 102 28 865 2 0.78 [0.70, 0.85] 1.00 [0.99, 1.00]

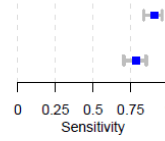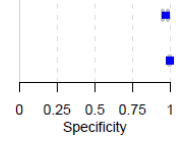

**Innova**

Author, Study ID Sample size TP FN TN FP Sensitivity [95%CI] Specificity [95%CI]

Houston, f25.1 728 242 38 426 22 0.86 [0.82, 0.90] 0.95 [0.93, 0.97]

Young, f56.1 786 133 81 572 0 0.62 [0.55, 0.69] 1.00 [0.99, 1.00]

Pickering, f73.1 200 89 11 99 1 0.89 [0.81, 0.94] 0.99 [0.95, 1.00]

García-Fiñana, f131.1 5504 28 42 5431 3 0.40 [0.28, 0.52] 1.00 [1.00, 1.00]

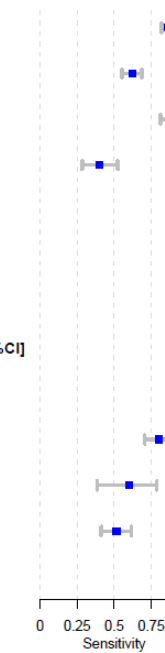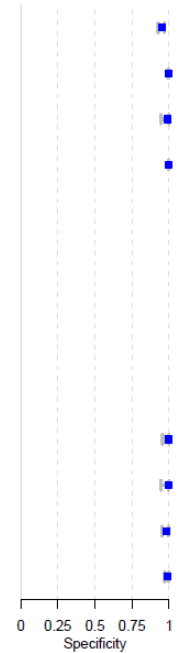

**CLINITEST**

Author, Study ID Sample size TP FN TN FP Sensitivity [95%CI] Specificity [95%CI]

Torres, f29.1 178 73 18 87 0 0.80 [0.71, 0.88] 1.00 [0.96, 1.00]

Torres, f29.2 92 15 10 67 0 0.60 [0.39, 0.79] 1.00 [0.95, 1.00]

Baro, f33.2 286 52 49 182 3 0.52 [0.41, 0.62] 0.98 [0.95, 1.00]

Merino-Amador, f160.1 450 179 13 256 2 0.93 [0.89, 0.96] 0.99 [0.97, 1.00]

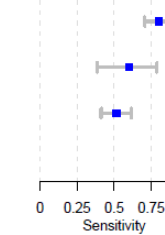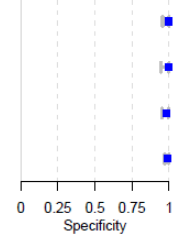

**Joysbio**

**Author, Study ID Sample size TP FN TN FP Sensitivity [95%CI] Specificity [95%CI]**

|               |     |    |    |     |   |                   |                   |
|---------------|-----|----|----|-----|---|-------------------|-------------------|
| FINDdx, f40.1 | 265 | 31 | 13 | 219 | 2 | 0.70 [0.55, 0.83] | 0.99 [0.97, 1.00] |
| Homza, f87.2  | 225 | 52 | 38 | 133 | 2 | 0.58 [0.47, 0.68] | 0.98 [0.95, 1.00] |

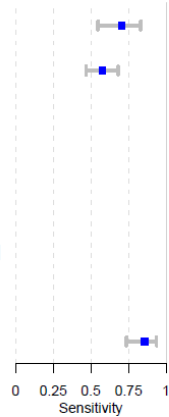

**Wondfo**

**Author, Study ID Sample size TP FN TN FP Sensitivity [95%CI] Specificity [95%CI]**

|               |     |    |   |     |   |                   |                   |
|---------------|-----|----|---|-----|---|-------------------|-------------------|
| FINDdx, f41.1 | 328 | 48 | 8 | 272 | 0 | 0.86 [0.74, 0.94] | 1.00 [0.99, 1.00] |
|---------------|-----|----|---|-----|---|-------------------|-------------------|

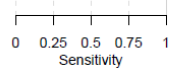

**Lituo**

**Author, Study ID Sample size TP FN TN FP Sensitivity [95%CI] Specificity [95%CI]**

|                |     |     |    |     |   |                   |                   |
|----------------|-----|-----|----|-----|---|-------------------|-------------------|
| Terpos, f130.1 | 358 | 102 | 12 | 243 | 1 | 0.90 [0.82, 0.94] | 1.00 [0.98, 1.00] |
|----------------|-----|-----|----|-----|---|-------------------|-------------------|

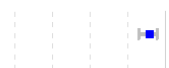

**Fluorecare**

**Author, Study ID Sample size TP FN TN FP Sensitivity [95%CI] Specificity [95%CI]**

|               |    |    |    |   |   |                   |                   |
|---------------|----|----|----|---|---|-------------------|-------------------|
| Lunca, f138.1 | 47 | 23 | 17 | 7 | 0 | 0.58 [0.41, 0.73] | 1.00 [0.59, 1.00] |
|---------------|----|----|----|---|---|-------------------|-------------------|

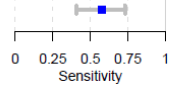

**LumiraDx**

**Author, Study ID Sample size TP FN TN FP Sensitivity [95%CI] Specificity [95%CI]**

|                   |     |     |    |     |    |                   |                   |
|-------------------|-----|-----|----|-----|----|-------------------|-------------------|
| Kohmer, f32.4     | 100 | 37  | 37 | 26  | 0  | 0.50 [0.38, 0.62] | 1.00 [0.87, 1.00] |
| Drain, f43.1      | 257 | 81  | 2  | 168 | 6  | 0.98 [0.92, 1.00] | 0.97 [0.93, 0.99] |
| Drain, f43.2      | 255 | 39  | 1  | 210 | 5  | 0.98 [0.87, 1.00] | 0.98 [0.95, 0.99] |
| Krüger, f58.1     | 761 | 120 | 26 | 611 | 4  | 0.82 [0.75, 0.88] | 0.99 [0.98, 1.00] |
| Bianco, f102.1    | 907 | 269 | 29 | 561 | 48 | 0.90 [0.86, 0.93] | 0.92 [0.90, 0.94] |
| Caramello, f108.2 | 149 | 84  | 13 | 46  | 6  | 0.87 [0.78, 0.93] | 0.88 [0.77, 0.96] |
| Blairon, f113.3   | 198 | 91  | 58 | 49  | 0  | 0.61 [0.53, 0.69] | 1.00 [0.93, 1.00] |
| Fernández, f128.1 | 46  | 21  | 3  | 22  | 0  | 0.88 [0.68, 0.97] | 1.00 [0.85, 1.00] |
| Karon, f148.2     | 347 | 164 | 33 | 150 | 0  | 0.83 [0.77, 0.88] | 1.00 [0.98, 1.00] |
| Leli, f151.1      | 792 | 114 | 52 | 596 | 30 | 0.69 [0.61, 0.76] | 0.95 [0.93, 0.97] |
| Cento, f196.1     | 960 | 297 | 50 | 596 | 17 | 0.86 [0.81, 0.89] | 0.97 [0.96, 0.98] |

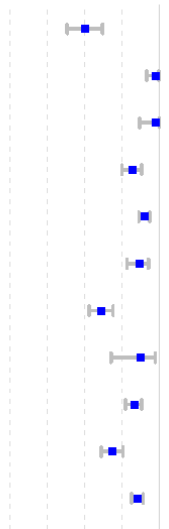



**Nadal**

| Author, Study ID | Sample size | TP | FN | TN  | FP | Sensitivity [95%CI] | Specificity [95%CI] |
|------------------|-------------|----|----|-----|----|---------------------|---------------------|
| Kohmer, f32.3    | 100         | 18 | 56 | 26  | 0  | 0.24 [0.15, 0.36]   | 1.00 [0.87, 1.00]   |
| FINDDx, f94.1    | 462         | 61 | 8  | 390 | 3  | 0.88 [0.78, 0.95]   | 0.99 [0.98, 1.00]   |
| Ifko, f169.1     | 125         | 20 | 3  | 90  | 12 | 0.87 [0.66, 0.97]   | 0.88 [0.80, 0.94]   |

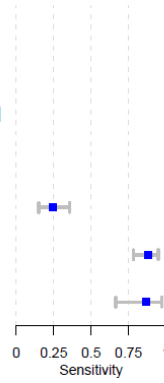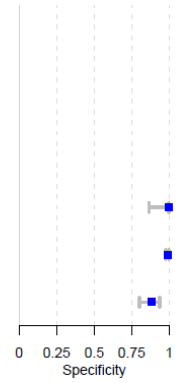

**NowCheck nasal**

| Author, Study ID | Sample size | TP | FN | TN  | FP | Sensitivity [95%CI] | Specificity [95%CI] |
|------------------|-------------|----|----|-----|----|---------------------|---------------------|
| FINDDx, f91.1    | 218         | 71 | 8  | 137 | 2  | 0.90 [0.81, 0.96]   | 0.99 [0.95, 1.00]   |

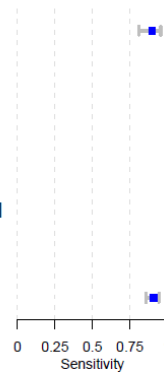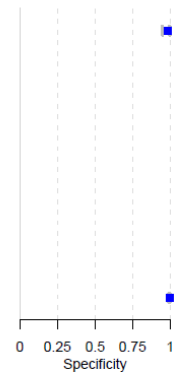

**Mologic**

| Author, Study ID | Sample size | TP  | FN | TN  | FP | Sensitivity [95%CI] | Specificity [95%CI] |
|------------------|-------------|-----|----|-----|----|---------------------|---------------------|
| FINDDx, f93.1    | 665         | 176 | 18 | 471 | 0  | 0.91 [0.86, 0.94]   | 1.00 [0.99, 1.00]   |

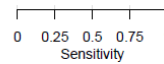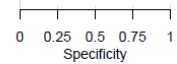

**OA-LFA**

| Author, Study ID | Sample size | TP | FN | TN | FP | Sensitivity [95%CI] | Specificity [95%CI] |
|------------------|-------------|----|----|----|----|---------------------|---------------------|
| Bachmann, f154.1 | 167         | 75 | 33 | 57 | 2  | 0.69 [0.60, 0.78]   | 0.97 [0.88, 1.00]   |
| Bachmann, f154.4 | 167         | 75 | 15 | 75 | 2  | 0.83 [0.74, 0.90]   | 0.97 [0.91, 1.00]   |

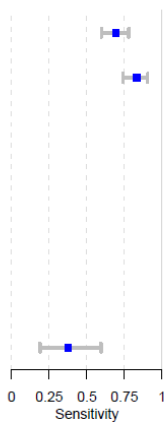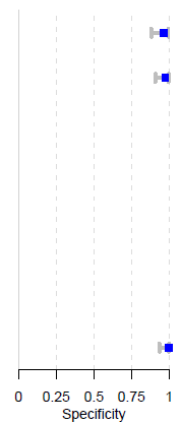

**Afias**

| Author, Study ID | Sample size | TP | FN | TN | FP | Sensitivity [95%CI] | Specificity [95%CI] |
|------------------|-------------|----|----|----|----|---------------------|---------------------|
| Baccani, f165.3  | 81          | 9  | 15 | 57 | 0  | 0.38 [0.19, 0.59]   | 1.00 [0.94, 1.00]   |

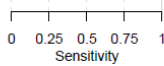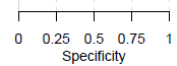

**Orient Gene**

**Author, Study ID    Sample size    TP    FN    TN    FP    Sensitivity [95%CI]    Specificity [95%CI]**

|                      |     |     |    |     |    |                   |                   |
|----------------------|-----|-----|----|-----|----|-------------------|-------------------|
| Nordgren, f117.2     | 332 | 124 | 32 | 131 | 45 | 0.80 [0.72, 0.86] | 0.74 [0.67, 0.81] |
| Van Honacker, f143.3 | 98  | 48  | 10 | 37  | 3  | 0.83 [0.71, 0.91] | 0.92 [0.80, 0.98] |

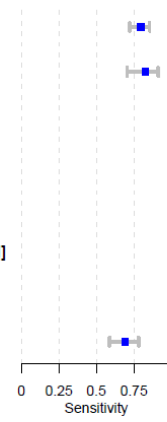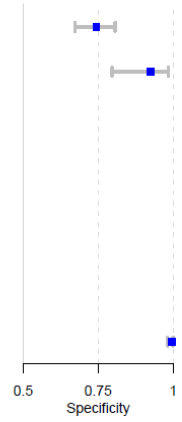

**AMP**

**Author, Study ID    Sample size    TP    FN    TN    FP    Sensitivity [95%CI]    Specificity [95%CI]**

|                 |     |    |    |     |   |                   |                   |
|-----------------|-----|----|----|-----|---|-------------------|-------------------|
| Leixner, f125.1 | 392 | 65 | 29 | 297 | 1 | 0.69 [0.59, 0.78] | 1.00 [0.98, 1.00] |
|-----------------|-----|----|----|-----|---|-------------------|-------------------|

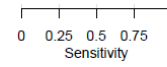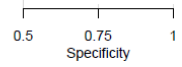

**Panbio (nasal)**

**Author, Study ID    Sample size    TP    FN    TN    FP    Sensitivity [95%CI]    Specificity [95%CI]**

|               |     |    |   |     |   |                   |                   |
|---------------|-----|----|---|-----|---|-------------------|-------------------|
| FINDdx, f42.1 | 281 | 38 | 6 | 235 | 2 | 0.86 [0.73, 0.95] | 0.99 [0.97, 1.00] |
|---------------|-----|----|---|-----|---|-------------------|-------------------|

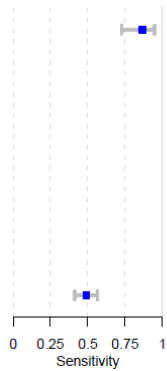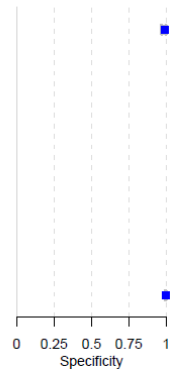

**BD Veritor nasal**

**Author, Study ID    Sample size    TP    FN    TN    FP    Sensitivity [95%CI]    Specificity [95%CI]**

|              |      |    |    |      |   |                   |                   |
|--------------|------|----|----|------|---|-------------------|-------------------|
| Stohr, f45.1 | 1565 | 86 | 90 | 1387 | 2 | 0.49 [0.41, 0.56] | 1.00 [1.00, 1.00] |
|--------------|------|----|----|------|---|-------------------|-------------------|

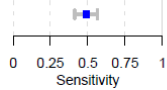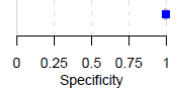

**QuickNavi**

**Author, Study ID    Sample size    TP    FN    TN    FP    Sensitivity [95%CI]    Specificity [95%CI]**

|                 |      |    |    |      |   |                   |                   |
|-----------------|------|----|----|------|---|-------------------|-------------------|
| Takeuchi, f12.1 | 1186 | 91 | 14 | 1081 | 0 | 0.87 [0.79, 0.92] | 1.00 [1.00, 1.00] |
| Takeuchi, f60.1 | 862  | 37 | 14 | 811  | 0 | 0.72 [0.58, 0.84] | 1.00 [1.00, 1.00] |

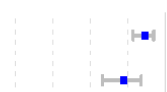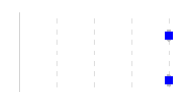

**ECODiagnostica**

**Author, Study ID    Sample size    TP    FN    TN    FP    Sensitivity [95%CI]    Specificity [95%CI]**

|                   |     |    |    |    |   |                   |                   |
|-------------------|-----|----|----|----|---|-------------------|-------------------|
| Filgueiras, f14.1 | 139 | 38 | 17 | 83 | 1 | 0.69 [0.55, 0.81] | 0.99 [0.94, 1.00] |
|-------------------|-----|----|----|----|---|-------------------|-------------------|

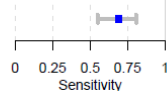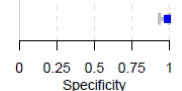

**R-Biopharm**

**Author, Study ID    Sample size    TP    FN    TN    FP    Sensitivity [95%CI]    Specificity [95%CI]**

|               |     |    |    |    |   |                   |                   |
|---------------|-----|----|----|----|---|-------------------|-------------------|
| Toptan, a55.2 | 70  | 16 | 16 | 38 | 0 | 0.50 [0.32, 0.68] | 1.00 [0.91, 1.00] |
| Toptan, a55.1 | 67  | 45 | 13 | 9  | 0 | 0.78 [0.65, 0.88] | 1.00 [0.66, 1.00] |
| Kohmer, f32.1 | 100 | 29 | 45 | 25 | 1 | 0.39 [0.28, 0.51] | 0.96 [0.80, 1.00] |

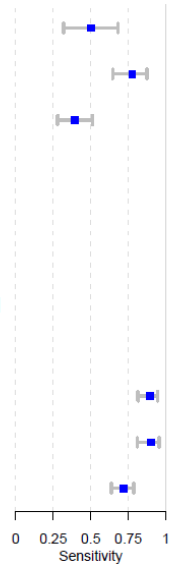

**NowCheck**

**Author, Study ID    Sample size    TP    FN    TN    FP    Sensitivity [95%CI]    Specificity [95%CI]**

|                 |     |     |    |     |    |                   |                   |
|-----------------|-----|-----|----|-----|----|-------------------|-------------------|
| FINDdx, a61.1   | 400 | 91  | 11 | 290 | 8  | 0.89 [0.81, 0.94] | 0.97 [0.95, 0.99] |
| FINDdx, f91.2   | 218 | 71  | 8  | 137 | 2  | 0.90 [0.81, 0.96] | 0.99 [0.95, 1.00] |
| Onsongo, f174.1 | 997 | 109 | 43 | 824 | 21 | 0.72 [0.64, 0.79] | 0.98 [0.96, 0.98] |

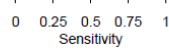

**Romed**

**Author, Study ID    Sample size    TP    FN    TN    FP    Sensitivity [95%CI]    Specificity [95%CI]**

|                  |     |     |    |     |   |                   |                   |
|------------------|-----|-----|----|-----|---|-------------------|-------------------|
| Koeleman, f103.6 | 900 | 220 | 80 | 599 | 1 | 0.73 [0.68, 0.78] | 1.00 [0.99, 1.00] |
| Koeleman, f103.1 | 80  | 29  | 11 | 40  | 0 | 0.72 [0.56, 0.85] | 1.00 [0.91, 1.00] |

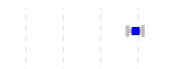

**Indicaid**

**Author, Study ID    Sample size    TP    FN    TN    FP    Sensitivity [95%CI]    Specificity [95%CI]**

|              |       |    |    |       |    |                   |                   |
|--------------|-------|----|----|-------|----|-------------------|-------------------|
| Chiu, f107.1 | 349   | 64 | 11 | 260   | 14 | 0.85 [0.75, 0.92] | 0.95 [0.92, 0.97] |
| Chiu, f107.2 | 349   | 62 | 13 | 264   | 10 | 0.83 [0.72, 0.90] | 0.96 [0.93, 0.98] |
| Chiu, f107.3 | 22994 | 32 | 6  | 22938 | 18 | 0.84 [0.69, 0.94] | 1.00 [1.00, 1.00] |

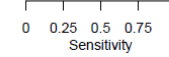

**SGTI-flex**

**Author, Study ID Sample size TP FN TN FP Sensitivity [95%CI] Specificity [95%CI]**

Shidlovskaya, f61.2 106 41 37 27 1 0.53 [0.41, 0.64] 0.96 [0.82, 1.00]

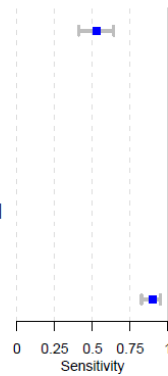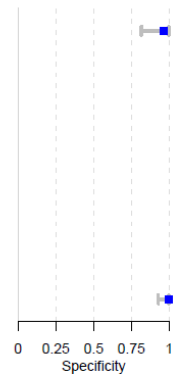

**Sienna**

**Author, Study ID Sample size TP FN TN FP Sensitivity [95%CI] Specificity [95%CI]**

Bouassa, f67.1 150 90 10 50 0 0.90 [0.82, 0.95] 1.00 [0.93, 1.00]

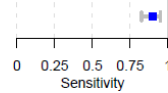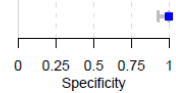

**Sofia**

**Author, Study ID Sample size TP FN TN FP Sensitivity [95%CI] Specificity [95%CI]**

Beck, a04.1 346 47 14 284 1 0.77 [0.64, 0.87] 1.00 [0.98, 1.00]

Porte, a32.1 64 30 2 31 1 0.94 [0.79, 0.99] 0.97 [0.84, 1.00]

Herrera, a46.1 1172 352 107 707 6 0.77 [0.72, 0.80] 0.99 [0.98, 1.00]

Marti, f46.1 427 31 12 383 1 0.72 [0.56, 0.85] 1.00 [0.99, 1.00]

Jääskeläinen, f50.1 188 119 29 40 0 0.80 [0.73, 0.86] 1.00 [0.91, 1.00]

Brihn, f98.1 2039 98 51 1878 12 0.66 [0.58, 0.73] 0.99 [0.99, 1.00]

Bornemann, f112.1 1391 52 39 1291 9 0.57 [0.46, 0.68] 0.99 [0.99, 1.00]

Harris, f114.1 885 251 54 573 7 0.82 [0.78, 0.86] 0.99 [0.98, 1.00]

Smith, f122.1 2887 180 55 2645 7 0.77 [0.71, 0.82] 1.00 [1.00, 1.00]

Bachmann, f154.2 170 81 29 59 1 0.74 [0.64, 0.82] 0.98 [0.91, 1.00]

Bachmann, f154.5 170 79 13 75 3 0.86 [0.77, 0.92] 0.96 [0.89, 0.99]

**Standard Q**

**Author, Study ID Sample size TP FN TN FP Sensitivity [95%CI] Specificity [95%CI]**

Berger, a05.2 529 170 21 337 1 0.89 [0.84, 0.93] 1.00 [0.98, 1.00]

Cerutti, a08.1 185 75 29 81 0 0.72 [0.62, 0.80] 1.00 [0.96, 1.00]

Gupta, a13.1 330 63 14 252 1 0.82 [0.71, 0.90] 1.00 [0.98, 1.00]

Igl...i, a15.1 970 158 28 780 4 0.85 [0.79, 0.90] 1.00 [0.99, 1.00]

Krüttgen, a16.1 150 53 22 72 3 0.71 [0.59, 0.81] 0.96 [0.89, 0.99]

Krüger, a17.1 1263 36 11 1207 9 0.77 [0.62, 0.88] 0.99 [0.99, 1.00]

Lindner, a21.1 289 29 10 248 2 0.74 [0.58, 0.87] 0.99 [0.97, 1.00]

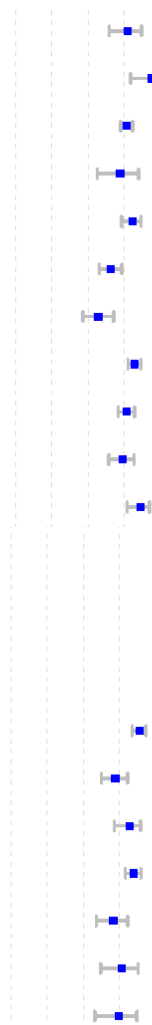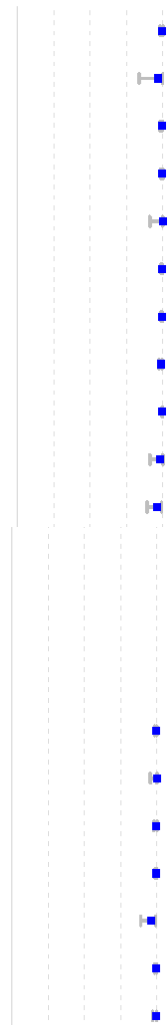

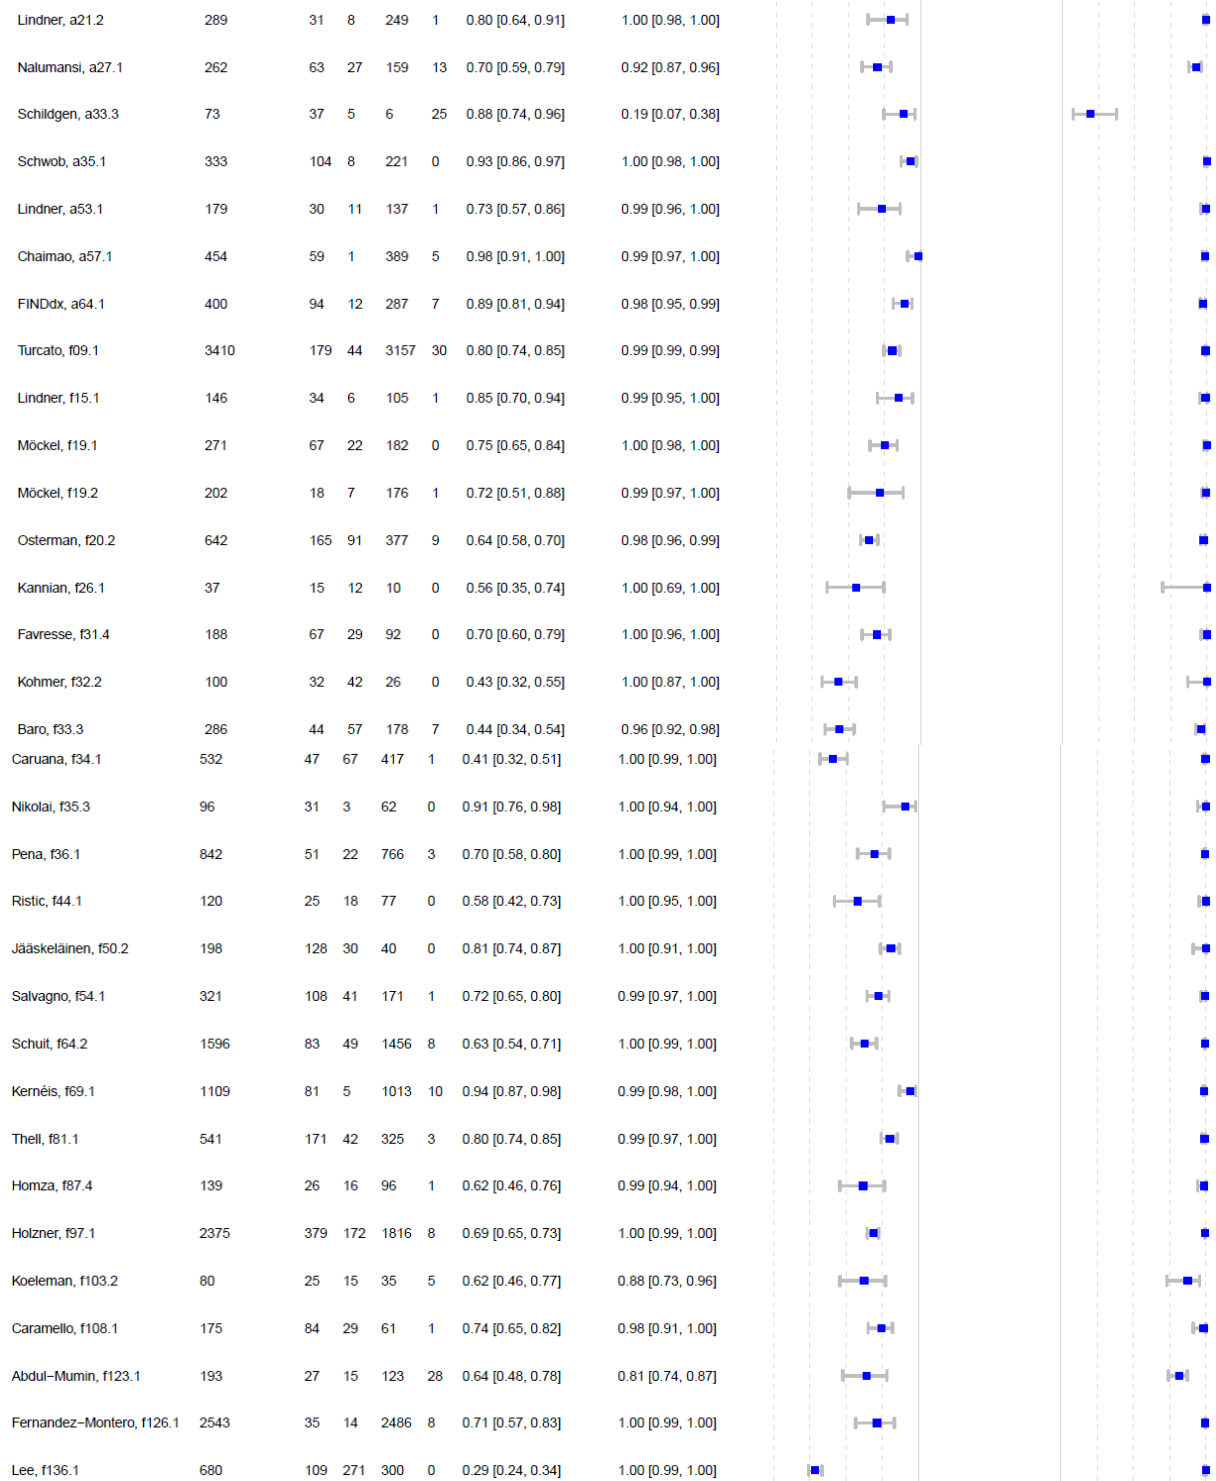

|                      |      |     |     |      |    |                   |                   |
|----------------------|------|-----|-----|------|----|-------------------|-------------------|
| Dankova, f142.1      | 1227 | 14  | 23  | 1190 | 0  | 0.38 [0.22, 0.55] | 1.00 [1.00, 1.00] |
| Van Honacker, f143.5 | 98   | 48  | 10  | 40   | 0  | 0.83 [0.71, 0.91] | 1.00 [0.91, 1.00] |
| Van Honacker, f143.6 | 4195 | 200 | 169 | 3814 | 12 | 0.54 [0.49, 0.59] | 1.00 [1.00, 1.00] |
| Wertenaue, f150.1    | 2215 | 204 | 134 | 1872 | 5  | 0.60 [0.55, 0.66] | 1.00 [0.99, 1.00] |
| Kim, f155.1          | 165  | 58  | 7   | 96   | 4  | 0.89 [0.79, 0.96] | 0.96 [0.90, 0.99] |
| Osterman, f157.1     | 409  | 25  | 81  | 303  | 0  | 0.24 [0.16, 0.33] | 1.00 [0.99, 1.00] |
| Jegerlehner, f172.1  | 1462 | 92  | 49  | 1319 | 2  | 0.65 [0.57, 0.73] | 1.00 [1.00, 1.00] |
| FINDDx, f181.1       | 333  | 59  | 50  | 218  | 6  | 0.54 [0.44, 0.64] | 0.97 [0.94, 0.99] |
| FINDDx, f181.2       | 335  | 71  | 29  | 234  | 1  | 0.71 [0.61, 0.80] | 1.00 [0.98, 1.00] |
| FINDDx, f182.1       | 214  | 66  | 12  | 135  | 1  | 0.85 [0.75, 0.92] | 0.99 [0.96, 1.00] |
| Korenkov, f187.1     | 1849 | 89  | 101 | 1657 | 2  | 0.47 [0.40, 0.54] | 1.00 [1.00, 1.00] |
| Fourati, f190.2      | 634  | 180 | 117 | 314  | 23 | 0.61 [0.55, 0.66] | 0.93 [0.90, 0.96] |

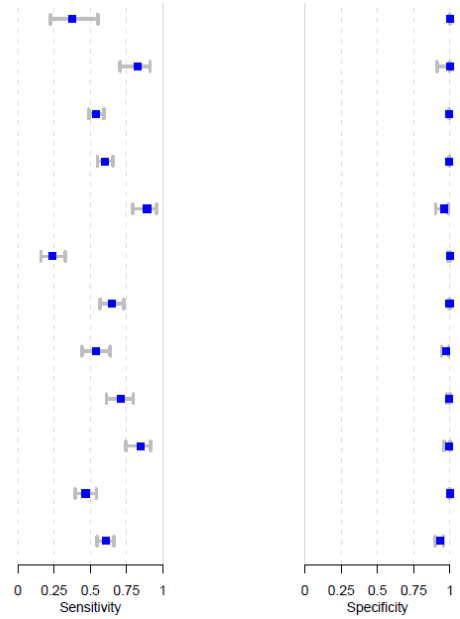

### Standard F

Author, Study ID Sample size TP FN TN FP Sensitivity [95%CI] Specificity [95%CI]

|                        |      |     |    |      |    |                   |                   |
|------------------------|------|-----|----|------|----|-------------------|-------------------|
| Drevinek, a10.2        | 591  | 139 | 84 | 366  | 2  | 0.62 [0.56, 0.69] | 1.00 [0.98, 1.00] |
| Liotti, a22.1          | 359  | 49  | 55 | 251  | 4  | 0.47 [0.37, 0.57] | 0.98 [0.96, 1.00] |
| Porte, a32.2           | 64   | 29  | 3  | 31   | 1  | 0.91 [0.75, 0.98] | 0.97 [0.84, 1.00] |
| FINDDx, a63.1          | 453  | 93  | 27 | 326  | 7  | 0.78 [0.69, 0.85] | 0.98 [0.96, 0.99] |
| FINDDx, a63.2          | 676  | 27  | 12 | 617  | 20 | 0.69 [0.52, 0.83] | 0.97 [0.95, 0.98] |
| Osterman, f20.1        | 549  | 115 | 74 | 352  | 8  | 0.61 [0.54, 0.68] | 0.98 [0.96, 0.99] |
| Pérez...García, f111.2 | 356  | 113 | 57 | 181  | 5  | 0.66 [0.59, 0.74] | 0.97 [0.94, 0.99] |
| Menchinelli, f145.1    | 2898 | 137 | 63 | 2617 | 81 | 0.69 [0.62, 0.75] | 0.97 [0.96, 0.98] |
| Baccani, f165.2        | 93   | 10  | 18 | 65   | 0  | 0.36 [0.19, 0.56] | 1.00 [0.94, 1.00] |
| Kahn, f167.1           | 3110 | 57  | 39 | 2983 | 31 | 0.59 [0.49, 0.69] | 0.99 [0.98, 0.99] |
| Orsi, f191.2           | 110  | 52  | 8  | 50   | 0  | 0.87 [0.75, 0.94] | 1.00 [0.93, 1.00] |

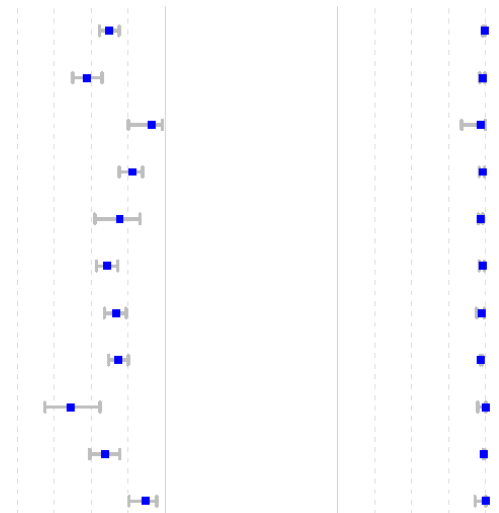

### Coris

Author, Study ID Sample size TP FN TN FP Sensitivity [95%CI] Specificity [95%CI]

|                       |     |     |     |     |   |                   |                   |
|-----------------------|-----|-----|-----|-----|---|-------------------|-------------------|
| Lambert-Niclot, a18.1 | 138 | 47  | 47  | 44  | 0 | 0.50 [0.40, 0.60] | 1.00 [0.92, 1.00] |
| Scoty, a34.1          | 148 | 32  | 74  | 42  | 0 | 0.30 [0.22, 0.40] | 1.00 [0.92, 1.00] |
| Mertens, a48.1        | 328 | 76  | 56  | 195 | 1 | 0.58 [0.49, 0.66] | 1.00 [0.97, 1.00] |
| Ciotti, f24.1         | 50  | 12  | 27  | 11  | 0 | 0.31 [0.17, 0.48] | 1.00 [0.72, 1.00] |
| Seynaeve, f137.2      | 100 | 31  | 19  | 50  | 0 | 0.62 [0.47, 0.75] | 1.00 [0.93, 1.00] |
| Kanaujia, f162.1      | 484 | 136 | 53  | 293 | 2 | 0.72 [0.65, 0.78] | 0.99 [0.98, 1.00] |
| Fourati, f190.1       | 634 | 105 | 192 | 337 | 0 | 0.35 [0.30, 0.41] | 1.00 [0.99, 1.00] |

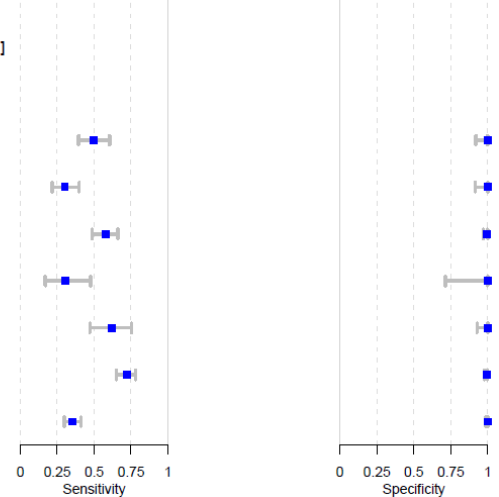

**Stark**

**Author, Study ID    Sample size    TP    FN    TN    FP    Sensitivity [95%CI]    Specificity [95%CI]**

Di Domenico, f140.1    433            36    0    382    15    1.00 [0.90, 1.00]    0.96 [0.94, 0.98]

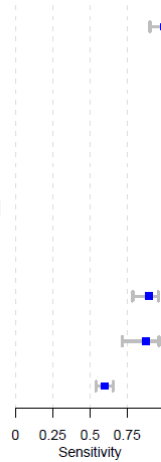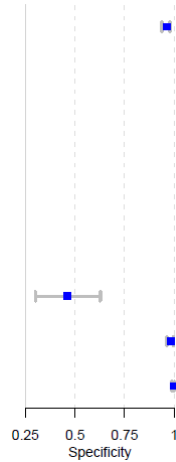

**Biosynex**

**Author, Study ID    Sample size    TP    FN    TN    FP    Sensitivity [95%CI]    Specificity [95%CI]**

Van Honacker, f143.1    97            52    6    18    21    0.90 [0.79, 0.96]    0.46 [0.30, 0.63]

Jung, f163.1            308            29    4    271    4    0.88 [0.72, 0.97]    0.98 [0.96, 1.00]

Fourati, f190.6        634            178    119    337    0    0.60 [0.54, 0.66]    1.00 [0.99, 1.00]

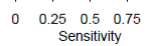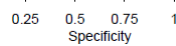

**SureScreen F**

**Author, Study ID    Sample size    TP    FN    TN    FP    Sensitivity [95%CI]    Specificity [95%CI]**

Pickering, f73.6        200            69    31    98    2    0.69 [0.59, 0.78]    0.98 [0.93, 1.00]

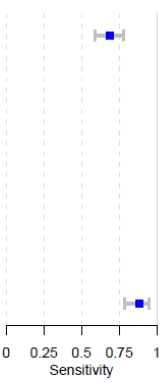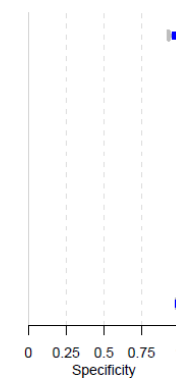

**Dräger**

**Author, Study ID    Sample size    TP    FN    TN    FP    Sensitivity [95%CI]    Specificity [95%CI]**

Osmanodja, f79.1        379            62    8    308    1    0.89 [0.79, 0.95]    1.00 [0.98, 1.00]

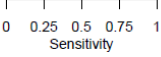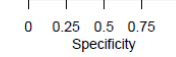

**SureScreen V**

**Author, Study ID    Sample size    TP    FN    TN    FP    Sensitivity [95%CI]    Specificity [95%CI]**

Baro, f33.5            286            29    72    181    4    0.29 [0.20, 0.39]    0.98 [0.95, 0.99]

Pickering, f73.3        200            65    35    100    0    0.65 [0.55, 0.74]    1.00 [0.96, 1.00]

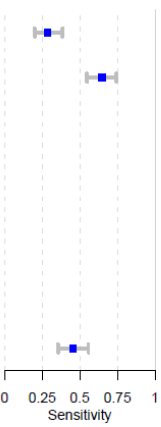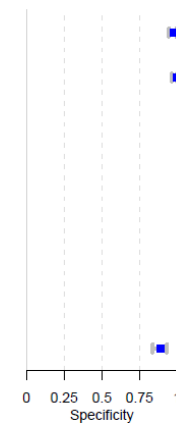

**Lepu**

**Author, Study ID    Sample size    TP    FN    TN    FP    Sensitivity [95%CI]    Specificity [95%CI]**

Baro, f33.4            286            46    55    165    20    0.46 [0.36, 0.56]    0.89 [0.84, 0.93]

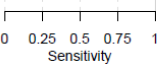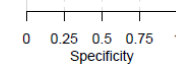

**V-Chek**

**Author, Study ID Sample size TP FN TN FP Sensitivity [95%CI] Specificity [95%CI]**

Kipritci, f146.1 110 21 13 76 0 0.62 [0.44, 0.78] 1.00 [0.95, 1.00]

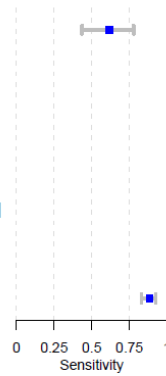

**Flowflex FIA**

**Author, Study ID Sample size TP FN TN FP Sensitivity [95%CI] Specificity [95%CI]**

Karon, f148.3 347 174 23 150 0 0.88 [0.83, 0.92] 1.00 [0.98, 1.00]

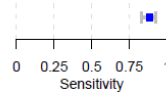

**VIRO AAZ**

**Author, Study ID Sample size TP FN TN FP Sensitivity [95%CI] Specificity [95%CI]**

Schwob, a35.3 324 116 22 186 0 0.84 [0.77, 0.90] 1.00 [0.98, 1.00]

Cassuto, f149.1 234 31 1 202 0 0.97 [0.84, 1.00] 1.00 [0.98, 1.00]

Fourati, f190.4 634 183 114 337 0 0.62 [0.56, 0.67] 1.00 [0.99, 1.00]

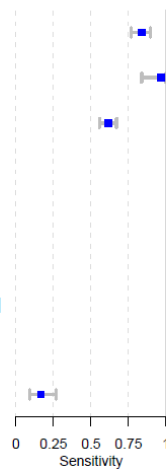

**Savant**

**Author, Study ID Sample size TP FN TN FP Sensitivity [95%CI] Specificity [95%CI]**

Weitzel, a41.3 109 13 65 31 0 0.17 [0.09, 0.27] 1.00 [0.89, 1.00]

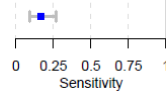

**VIVADiag**

**Author, Study ID Sample size TP FN TN FP Sensitivity [95%CI] Specificity [95%CI]**

Homza, f87.5 268 38 53 170 7 0.42 [0.32, 0.53] 0.96 [0.92, 0.98]

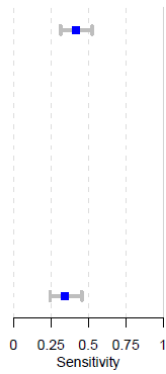

**ACCUCARE**

**Author, Study ID Sample size TP FN TN FP Sensitivity [95%CI] Specificity [95%CI]**

Thakur, f88.1 677 29 55 592 1 0.34 [0.24, 0.46] 1.00 [0.99, 1.00]

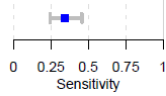

Supplement: pmed.1004011.s002.pdf [file pmed.1004011.s002.pdf]
