# Supplementary material for: Accuracy of rapid point-of-care antigen-based diagnostics for SARS-CoV-2: An updated systematic review and meta-analysis with meta-regression analyzing influencing factors
Source: PubMed Central journal article supplement (PMC9187092; doi:10.1371/journal.pmed.1004011), 2022-05-26

**S5 Fig. Forest plots for subgroup analysis by IFU vs. non-IFU.**

Caption: TP = true positive; FP = false positive; FN = false negative; TN = true negative; CI = confidence interval

**Fig A - Forest plots for IFU conforming studies**

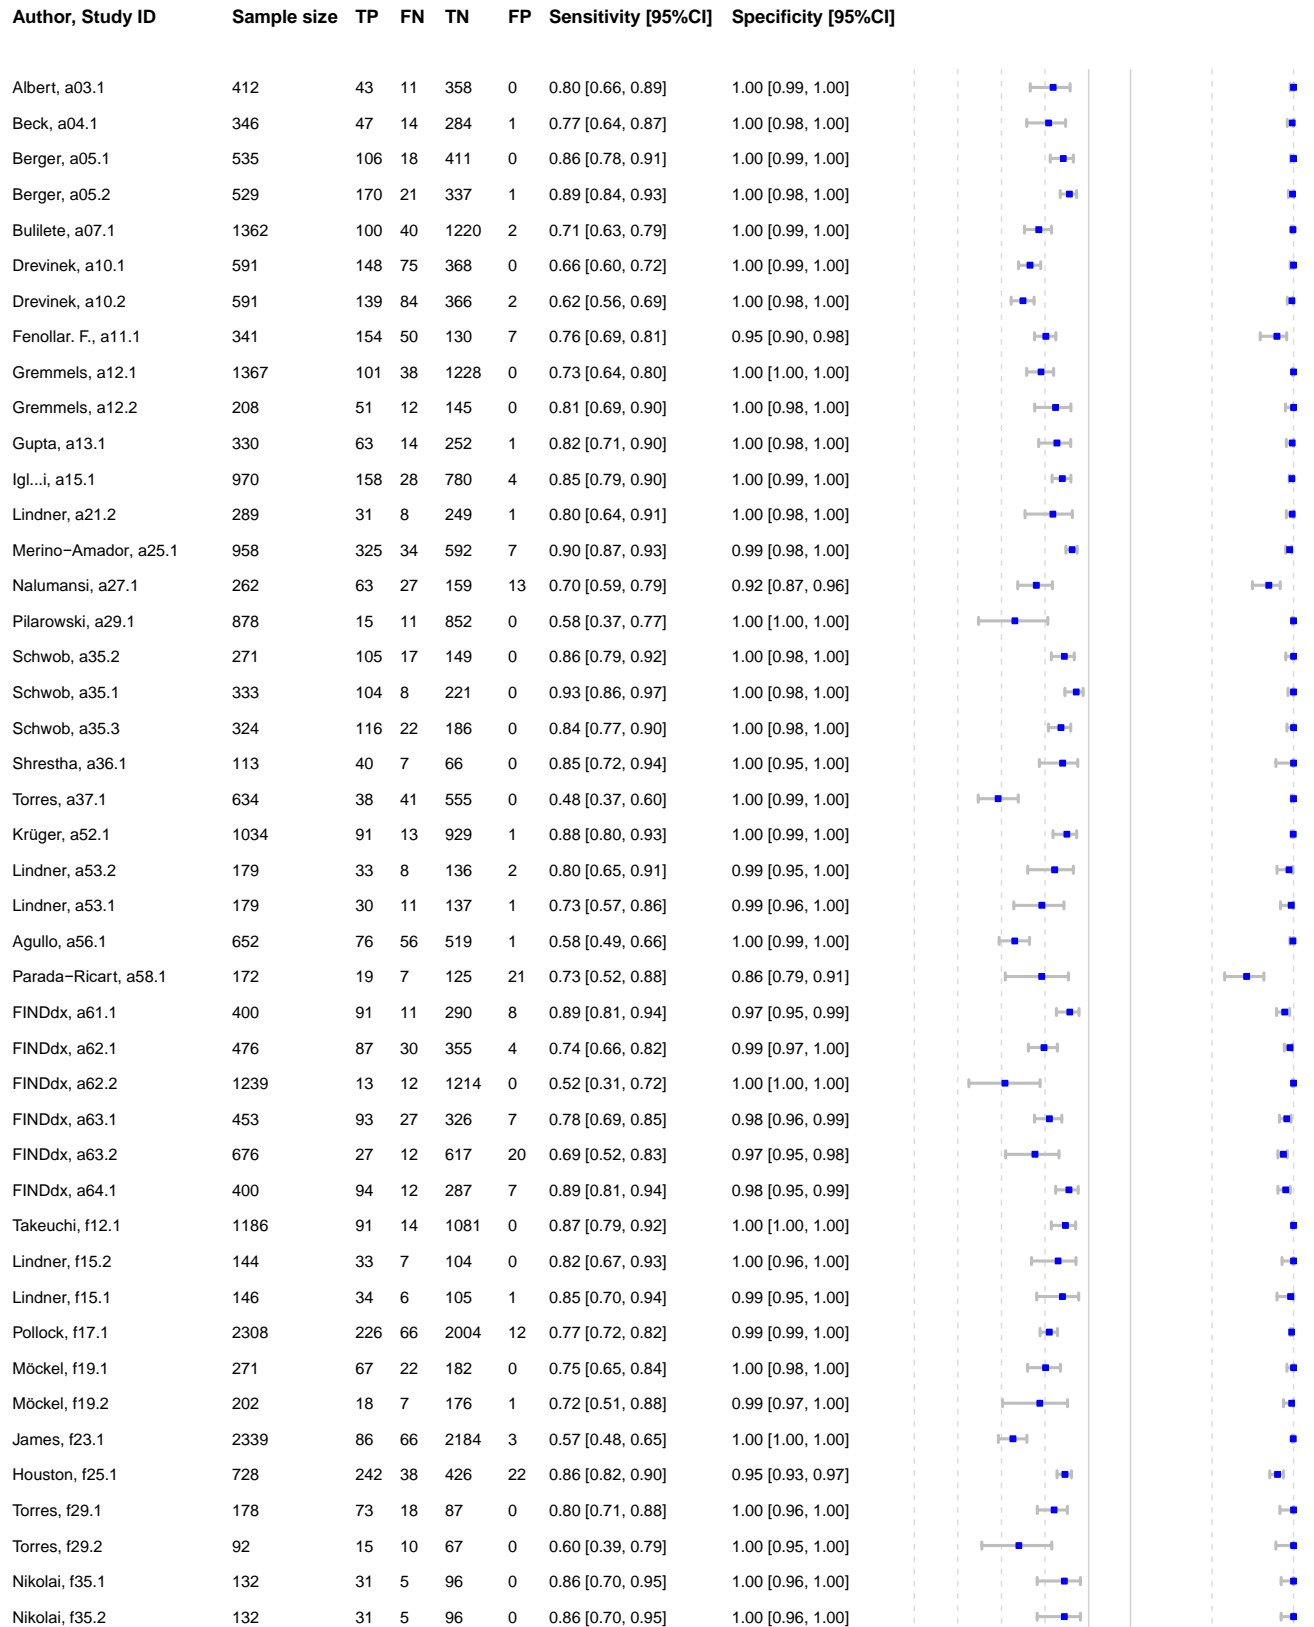

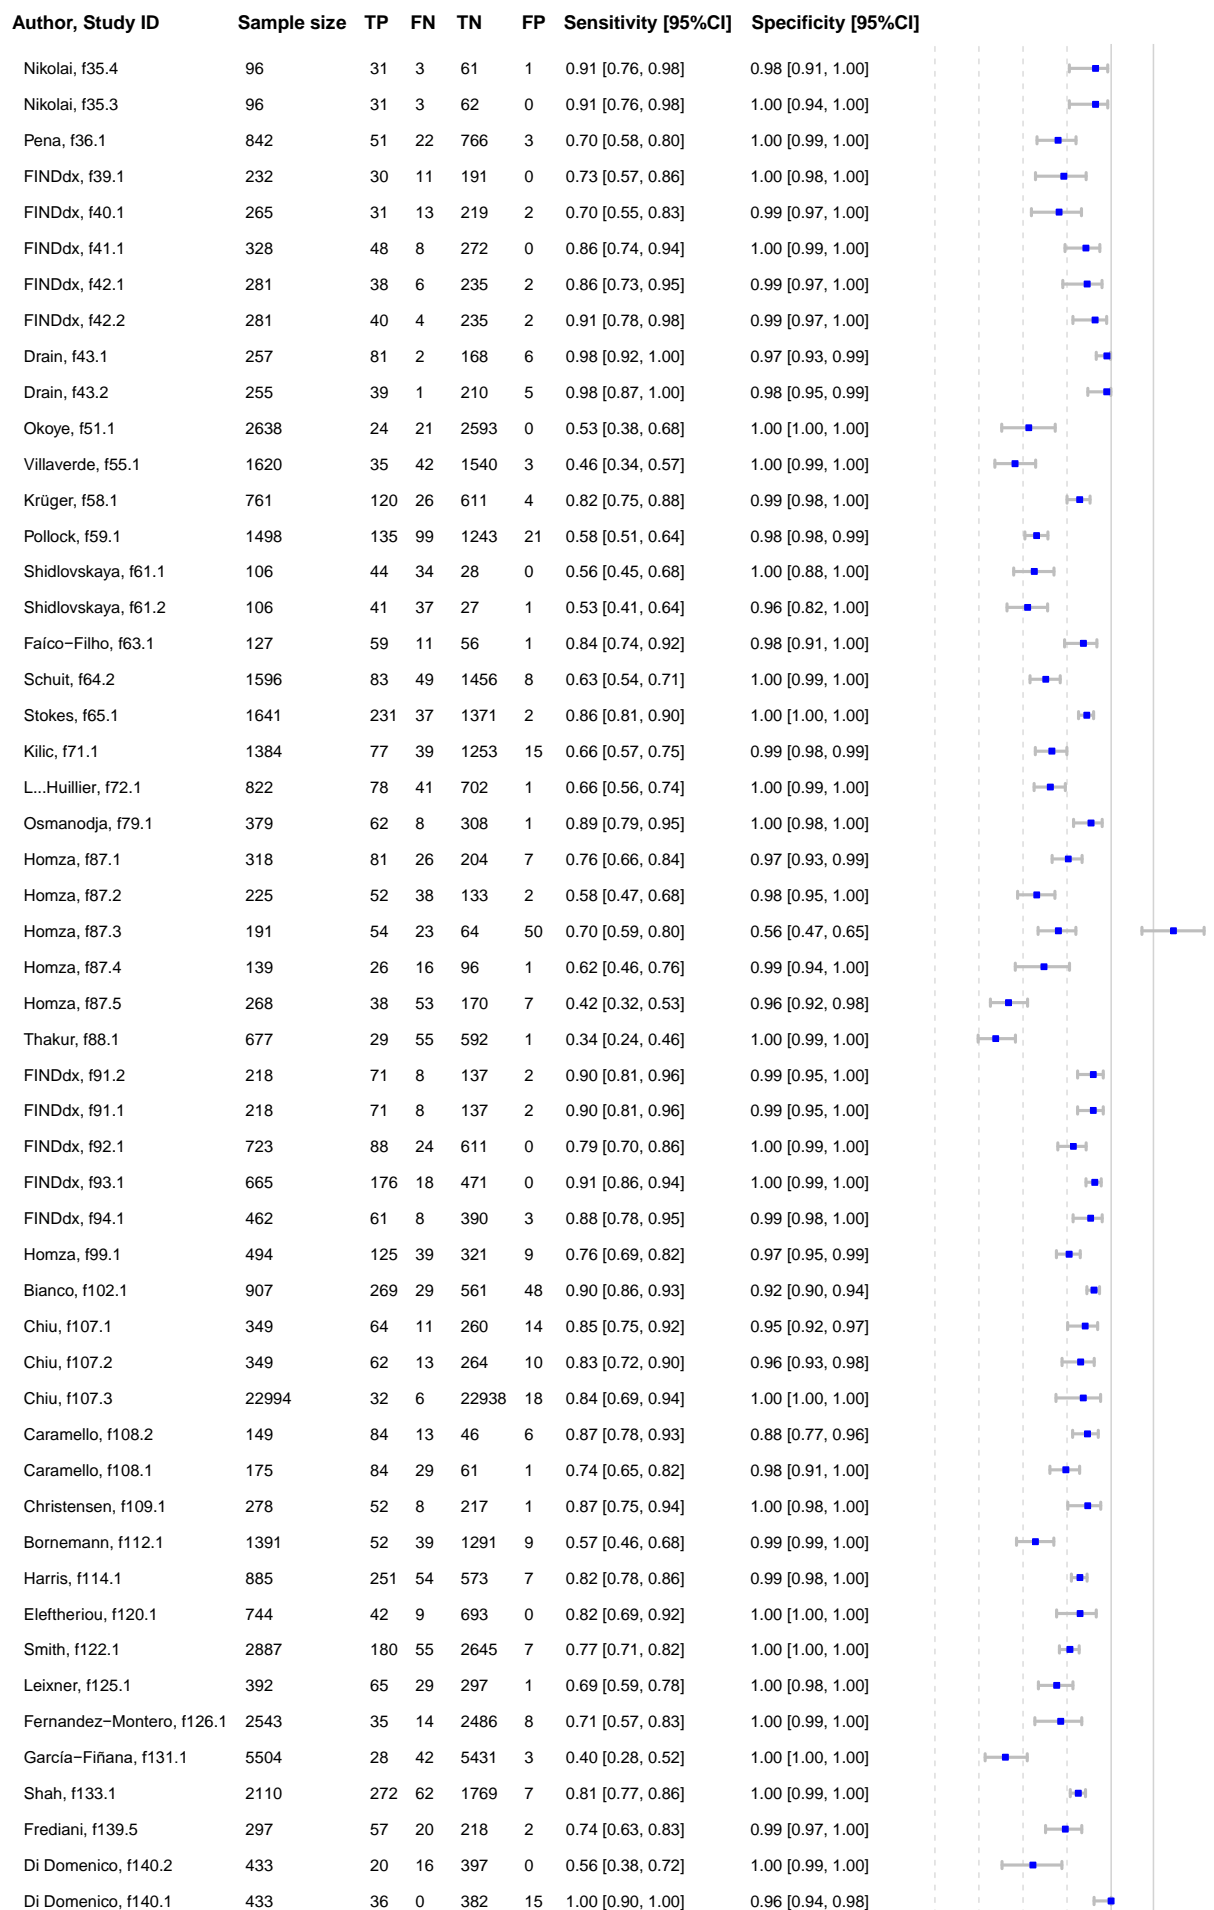

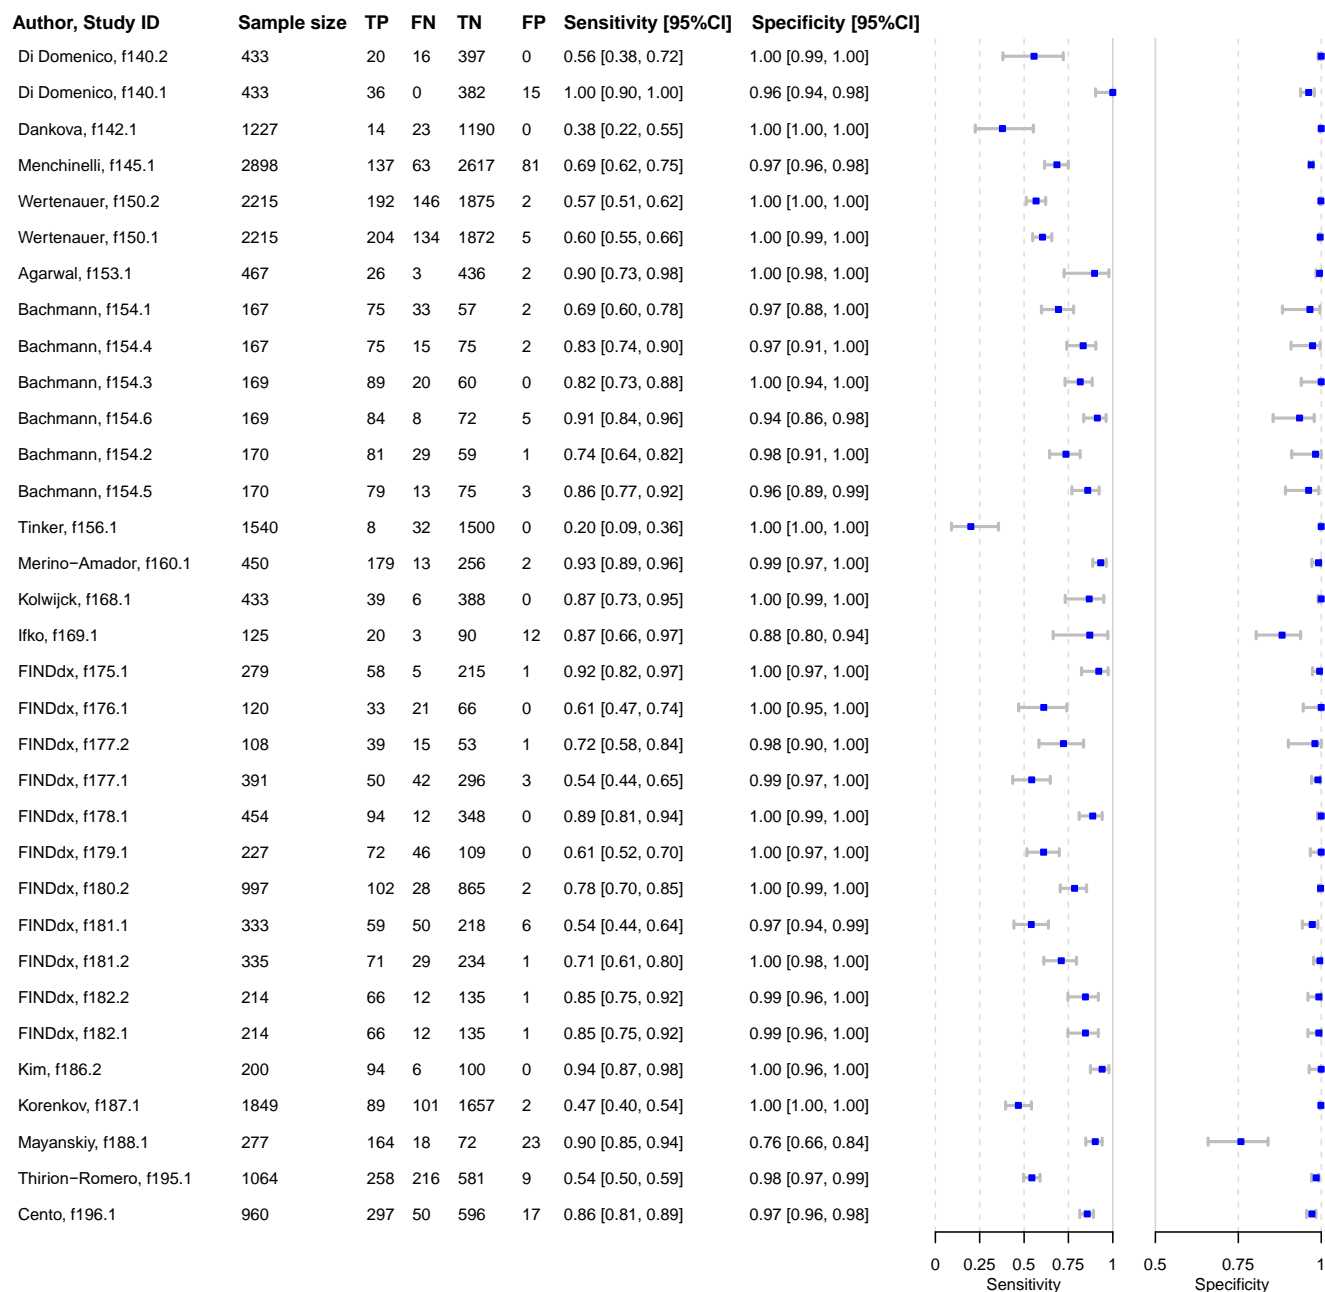

Fig B - Forest plots for non-IFU conforming studies

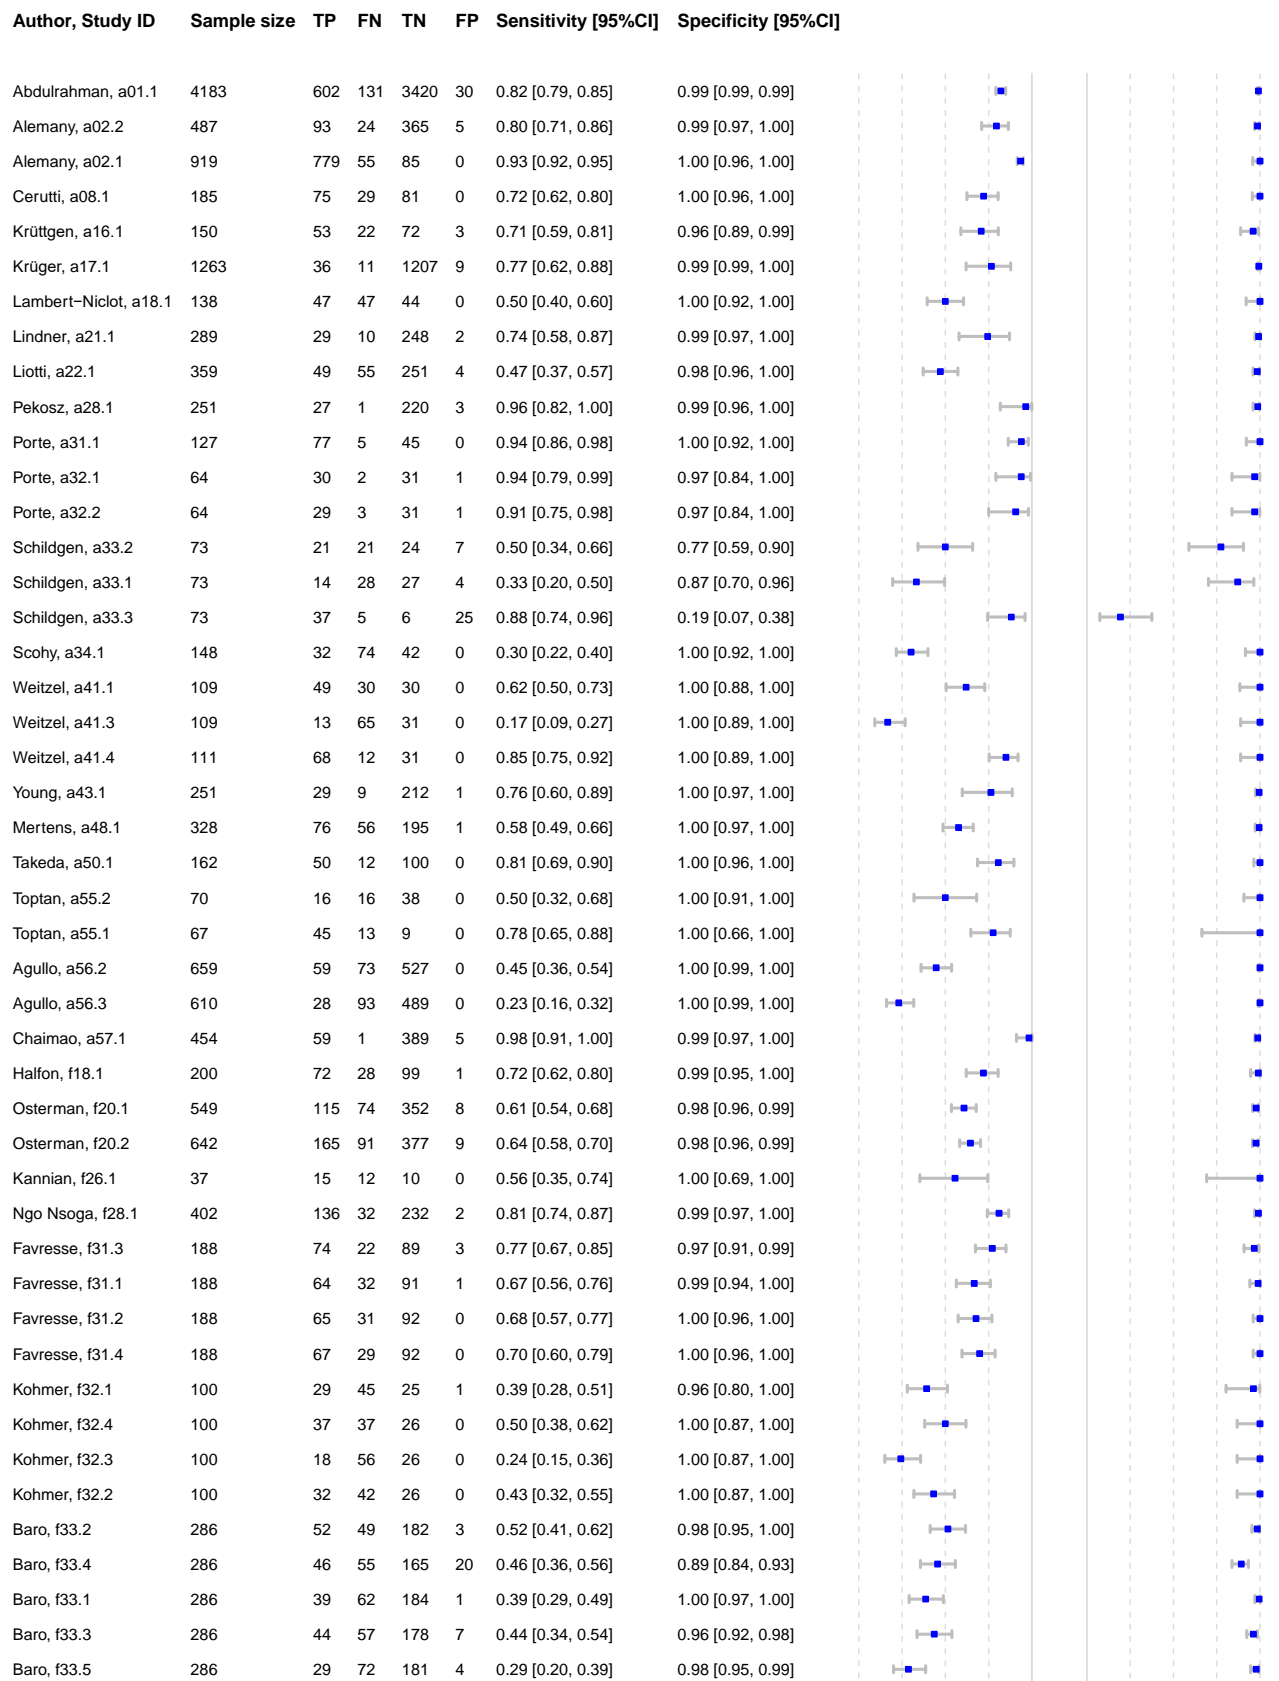

| Author, Study ID       | Sample size | TP  | FN  | TN   | FP | Sensitivity [95%CI] | Specificity [95%CI] |
|------------------------|-------------|-----|-----|------|----|---------------------|---------------------|
| Caruana, f34.4         | 532         | 47  | 67  | 417  | 1  | 0.41 [0.32, 0.51]   | 1.00 [0.99, 1.00]   |
| Caruana, f34.3         | 532         | 55  | 59  | 416  | 2  | 0.48 [0.39, 0.58]   | 1.00 [0.98, 1.00]   |
| Caruana, f34.2         | 532         | 47  | 67  | 416  | 2  | 0.41 [0.32, 0.51]   | 1.00 [0.98, 1.00]   |
| Caruana, f34.1         | 532         | 47  | 67  | 417  | 1  | 0.41 [0.32, 0.51]   | 1.00 [0.99, 1.00]   |
| Jääskeläinen, f50.3    | 190         | 126 | 26  | 38   | 0  | 0.83 [0.76, 0.88]   | 1.00 [0.91, 1.00]   |
| Jääskeläinen, f50.1    | 188         | 119 | 29  | 40   | 0  | 0.80 [0.73, 0.86]   | 1.00 [0.91, 1.00]   |
| Jääskeläinen, f50.2    | 198         | 128 | 30  | 40   | 0  | 0.81 [0.74, 0.87]   | 1.00 [0.91, 1.00]   |
| Pérez-García, f52.1    | 320         | 91  | 79  | 150  | 0  | 0.54 [0.46, 0.61]   | 1.00 [0.98, 1.00]   |
| Pérez-García, f52.2    | 320         | 102 | 68  | 150  | 0  | 0.60 [0.52, 0.67]   | 1.00 [0.98, 1.00]   |
| Salvagno, f54.1        | 321         | 108 | 41  | 171  | 1  | 0.72 [0.65, 0.80]   | 0.99 [0.97, 1.00]   |
| Schuit, f64.1          | 2678        | 149 | 84  | 2436 | 9  | 0.64 [0.57, 0.70]   | 1.00 [0.99, 1.00]   |
| Bouassa, f67.1         | 150         | 90  | 10  | 50   | 0  | 0.90 [0.82, 0.95]   | 1.00 [0.93, 1.00]   |
| Pickering, f73.6       | 200         | 69  | 31  | 98   | 2  | 0.69 [0.59, 0.78]   | 0.98 [0.93, 1.00]   |
| Pickering, f73.5       | 200         | 74  | 26  | 100  | 0  | 0.74 [0.64, 0.82]   | 1.00 [0.96, 1.00]   |
| Pickering, f73.1       | 200         | 89  | 11  | 99   | 1  | 0.89 [0.81, 0.94]   | 0.99 [0.95, 1.00]   |
| Pickering, f73.4       | 200         | 77  | 23  | 98   | 2  | 0.77 [0.68, 0.85]   | 0.98 [0.93, 1.00]   |
| Pickering, f73.3       | 200         | 65  | 35  | 100  | 0  | 0.65 [0.55, 0.74]   | 1.00 [0.96, 1.00]   |
| Koeleman, f103.2       | 80          | 25  | 15  | 35   | 5  | 0.62 [0.46, 0.77]   | 0.88 [0.73, 0.96]   |
| Koeleman, f103.3       | 80          | 22  | 18  | 39   | 1  | 0.55 [0.38, 0.71]   | 0.98 [0.87, 1.00]   |
| Koeleman, f103.6       | 900         | 220 | 80  | 599  | 1  | 0.73 [0.68, 0.78]   | 1.00 [0.99, 1.00]   |
| Koeleman, f103.1       | 80          | 29  | 11  | 40   | 0  | 0.72 [0.56, 0.85]   | 1.00 [0.91, 1.00]   |
| Pérez...García, f111.1 | 356         | 102 | 68  | 186  | 0  | 0.60 [0.52, 0.67]   | 1.00 [0.98, 1.00]   |
| Pérez...García, f111.2 | 356         | 113 | 57  | 181  | 5  | 0.66 [0.59, 0.74]   | 0.97 [0.94, 0.99]   |
| Blairon, f113.2        | 199         | 90  | 60  | 49   | 0  | 0.60 [0.52, 0.68]   | 1.00 [0.93, 1.00]   |
| Blairon, f113.3        | 198         | 91  | 58  | 49   | 0  | 0.61 [0.53, 0.69]   | 1.00 [0.93, 1.00]   |
| Blairon, f113.1        | 199         | 89  | 61  | 42   | 7  | 0.59 [0.51, 0.67]   | 0.86 [0.73, 0.94]   |
| Nordgren, f117.2       | 332         | 124 | 32  | 131  | 45 | 0.80 [0.72, 0.86]   | 0.74 [0.67, 0.81]   |
| Nordgren, f117.1       | 286         | 112 | 44  | 130  | 0  | 0.72 [0.64, 0.79]   | 1.00 [0.97, 1.00]   |
| Lee, f136.1            | 680         | 109 | 271 | 300  | 0  | 0.29 [0.24, 0.34]   | 1.00 [0.99, 1.00]   |
| Seynaeve, f137.2       | 100         | 31  | 19  | 50   | 0  | 0.62 [0.47, 0.75]   | 1.00 [0.93, 1.00]   |
| Seynaeve, f137.1       | 100         | 44  | 6   | 50   | 0  | 0.88 [0.76, 0.96]   | 1.00 [0.93, 1.00]   |
| Lunca, f138.1          | 47          | 23  | 17  | 7    | 0  | 0.58 [0.41, 0.73]   | 1.00 [0.59, 1.00]   |
| Van Honacker, f143.1   | 97          | 52  | 6   | 18   | 21 | 0.90 [0.79, 0.96]   | 0.46 [0.30, 0.63]   |
| Van Honacker, f143.3   | 98          | 48  | 10  | 37   | 3  | 0.83 [0.71, 0.91]   | 0.92 [0.80, 0.98]   |
| Van Honacker, f143.4   | 97          | 45  | 12  | 40   | 0  | 0.79 [0.66, 0.89]   | 1.00 [0.91, 1.00]   |
| Van Honacker, f143.5   | 98          | 48  | 10  | 40   | 0  | 0.83 [0.71, 0.91]   | 1.00 [0.91, 1.00]   |
| Van Honacker, f143.6   | 4195        | 200 | 169 | 3814 | 12 | 0.54 [0.49, 0.59]   | 1.00 [1.00, 1.00]   |
| Van Honacker, f143.2   | 98          | 39  | 19  | 40   | 0  | 0.67 [0.54, 0.79]   | 1.00 [0.91, 1.00]   |
| Karon, f148.4          | 347         | 153 | 44  | 146  | 4  | 0.78 [0.71, 0.83]   | 0.97 [0.93, 0.99]   |
| Karon, f148.3          | 347         | 174 | 23  | 150  | 0  | 0.88 [0.83, 0.92]   | 1.00 [0.98, 1.00]   |
| Karon, f148.1          | 347         | 131 | 66  | 150  | 0  | 0.66 [0.59, 0.73]   | 1.00 [0.98, 1.00]   |
| Karon, f148.2          | 347         | 164 | 33  | 150  | 0  | 0.83 [0.77, 0.88]   | 1.00 [0.98, 1.00]   |
| Kim, f155.1            | 165         | 58  | 7   | 96   | 4  | 0.89 [0.79, 0.96]   | 0.96 [0.90, 0.99]   |
| Osterman, f157.1       | 409         | 25  | 81  | 303  | 0  | 0.24 [0.16, 0.33]   | 1.00 [0.99, 1.00]   |
| Kanaujia, f162.1       | 484         | 136 | 53  | 293  | 2  | 0.72 [0.65, 0.78]   | 0.99 [0.98, 1.00]   |
| Baccani, f165.3        | 81          | 9   | 15  | 57   | 0  | 0.38 [0.19, 0.59]   | 1.00 [0.94, 1.00]   |
| Baccani, f165.2        | 93          | 10  | 18  | 65   | 0  | 0.36 [0.19, 0.56]   | 1.00 [0.94, 1.00]   |
| Kahn, f167.1           | 3110        | 57  | 39  | 2983 | 31 | 0.59 [0.49, 0.69]   | 0.99 [0.98, 0.99]   |
| Johnson, f170.1        | 100         | 47  | 3   | 50   | 0  | 0.94 [0.84, 0.99]   | 1.00 [0.93, 1.00]   |
| Jegerlehner, f172.1    | 1462        | 92  | 49  | 1319 | 2  | 0.65 [0.57, 0.73]   | 1.00 [1.00, 1.00]   |
| Onsongo, f174.1        | 997         | 109 | 43  | 824  | 21 | 0.72 [0.64, 0.79]   | 0.98 [0.96, 0.98]   |
| FINDdx, f180.1         | 519         | 91  | 9   | 407  | 12 | 0.91 [0.84, 0.96]   | 0.97 [0.95, 0.98]   |
| Kim, f186.1            | 130         | 27  | 3   | 98   | 2  | 0.90 [0.74, 0.98]   | 0.98 [0.93, 1.00]   |
| Fourati, f190.6        | 634         | 178 | 119 | 337  | 0  | 0.60 [0.54, 0.66]   | 1.00 [0.99, 1.00]   |
| Fourati, f190.1        | 634         | 105 | 192 | 337  | 0  | 0.35 [0.30, 0.41]   | 1.00 [0.99, 1.00]   |
| Fourati, f190.5        | 634         | 97  | 200 | 332  | 5  | 0.33 [0.27, 0.38]   | 0.98 [0.97, 1.00]   |
| Fourati, f190.3        | 634         | 163 | 134 | 337  | 0  | 0.55 [0.49, 0.61]   | 1.00 [0.99, 1.00]   |
| Fourati, f190.2        | 634         | 180 | 117 | 314  | 23 | 0.61 [0.55, 0.66]   | 0.93 [0.90, 0.96]   |
| Fourati, f190.4        | 634         | 183 | 114 | 337  | 0  | 0.62 [0.56, 0.67]   | 1.00 [0.99, 1.00]   |
| Orsi, f191.2           | 110         | 52  | 8   | 50   | 0  | 0.87 [0.75, 0.94]   | 1.00 [0.93, 1.00]   |
| Orsi, f191.1           | 110         | 56  | 4   | 50   | 0  | 0.93 [0.84, 0.98]   | 1.00 [0.93, 1.00]   |

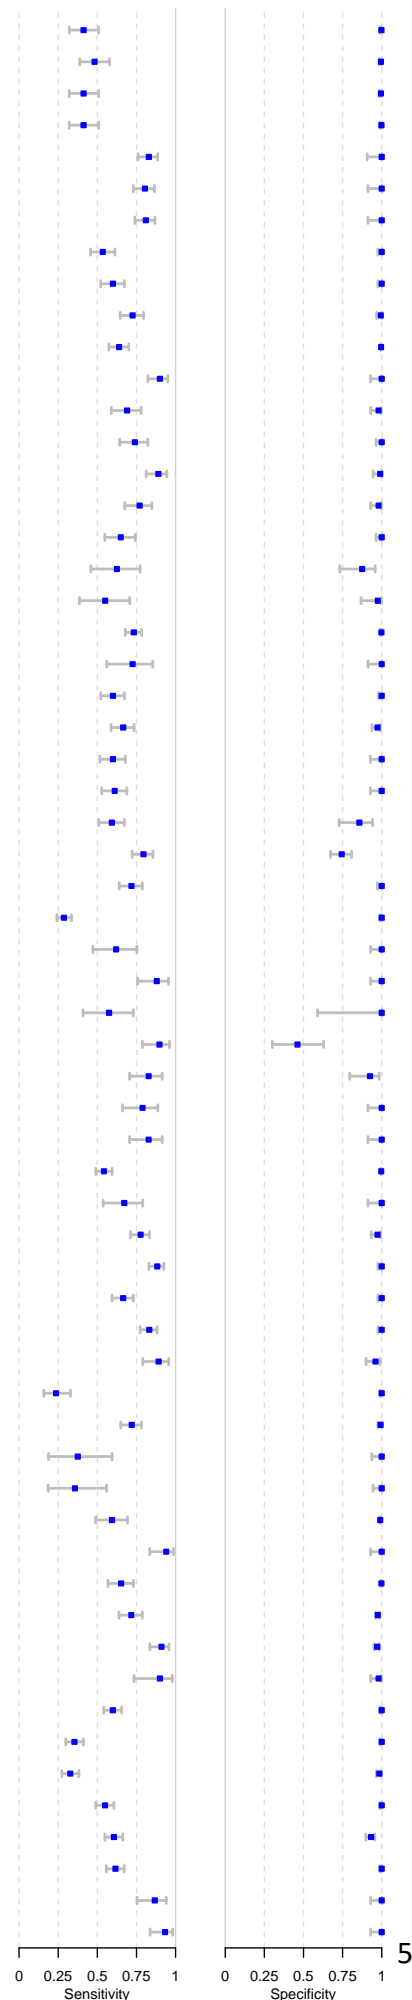

Supplement: pmed.1004011.s006.pdf [file pmed.1004011.s006.pdf]
