# Supplementary material for: Accuracy of rapid point-of-care antigen-based diagnostics for SARS-CoV-2: An updated systematic review and meta-analysis with meta-regression analyzing influencing factors
Source: PubMed Central journal article supplement (PMC9187092; doi:10.1371/journal.pmed.1004011), 2022-05-26

**S6 Fig. Forest plots for subgroup analysis by sample type.**

Caption: TP = true positive; FP = false positive; FN = false negative; TN = true negative; CI = confidence interval

**Fig A - Forest plots for anterior nasal and mid-turbinate samples**

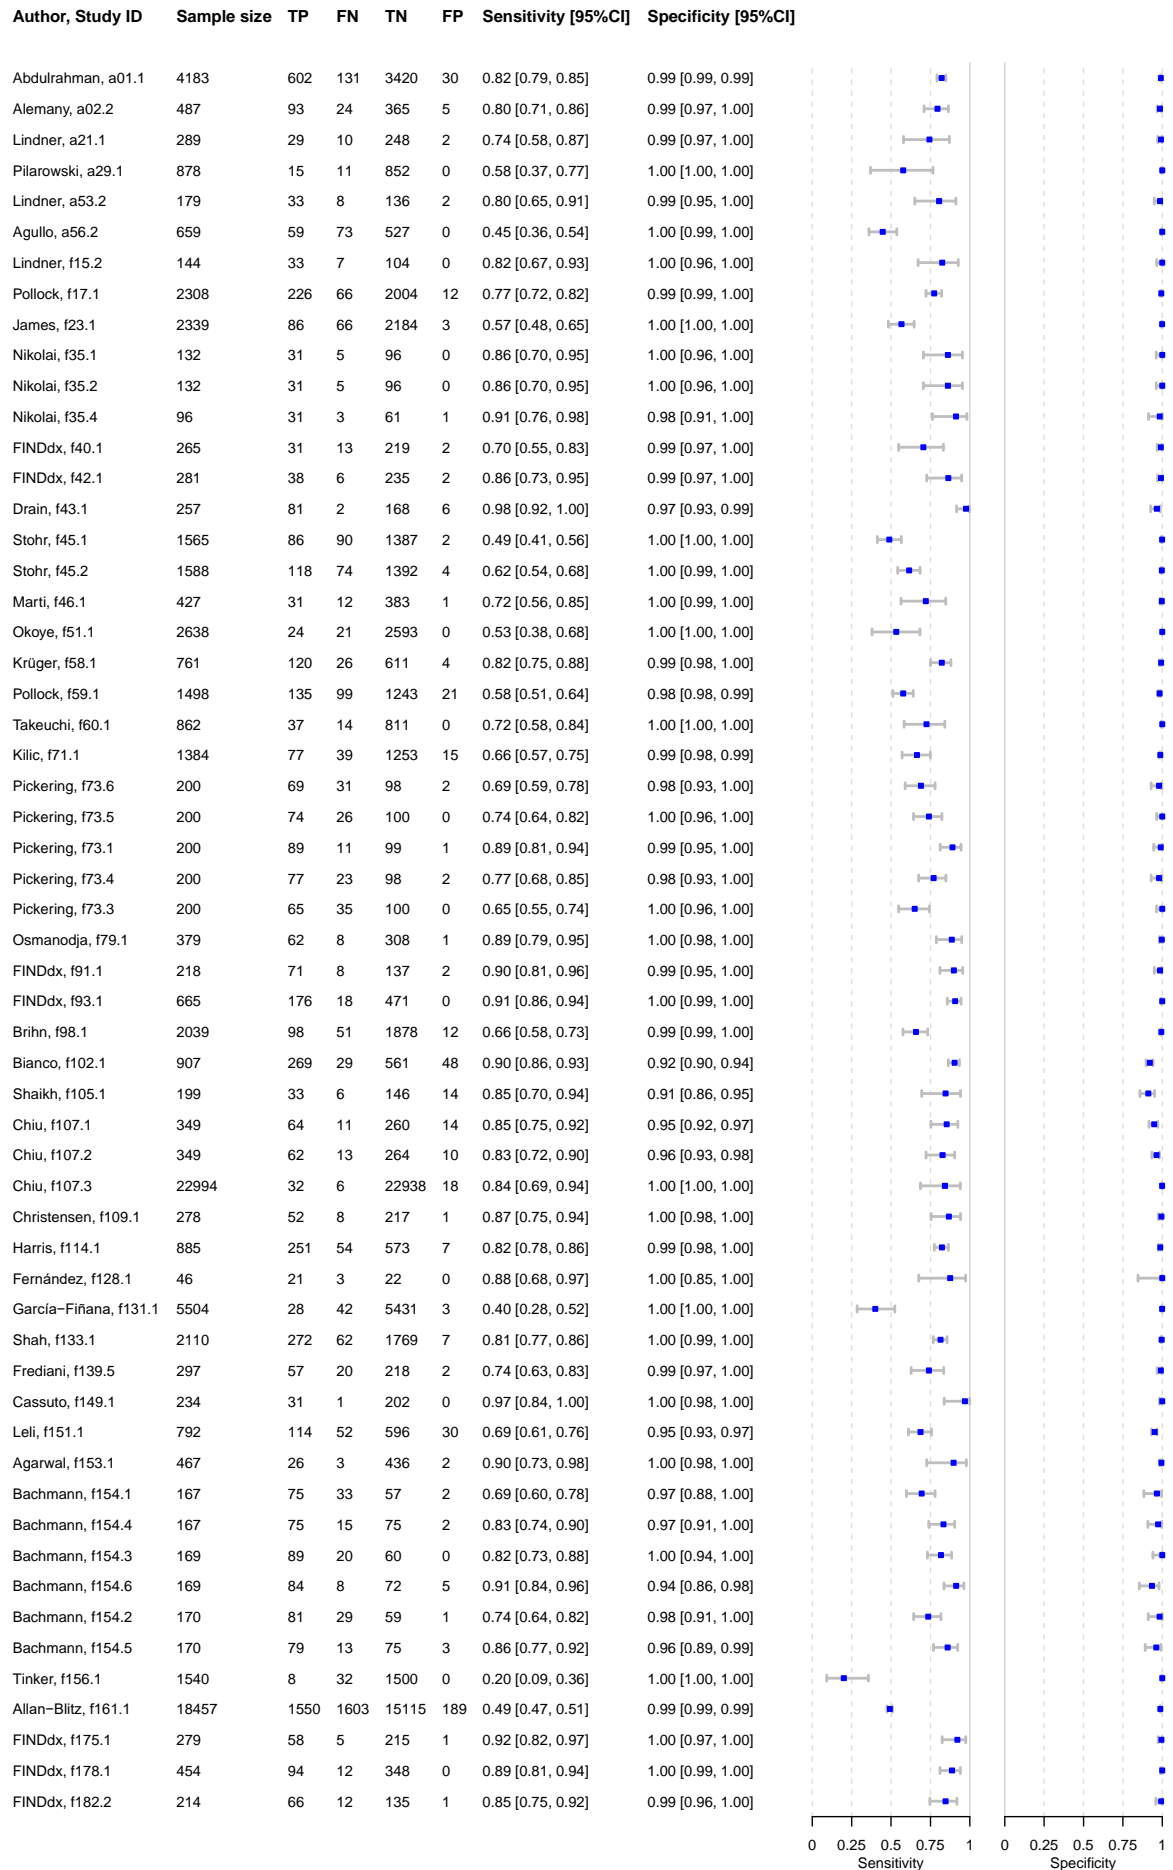

Fig B - Forest plots for nasopharyngeal and combined oropharyngeal/nasopharyngeal samples

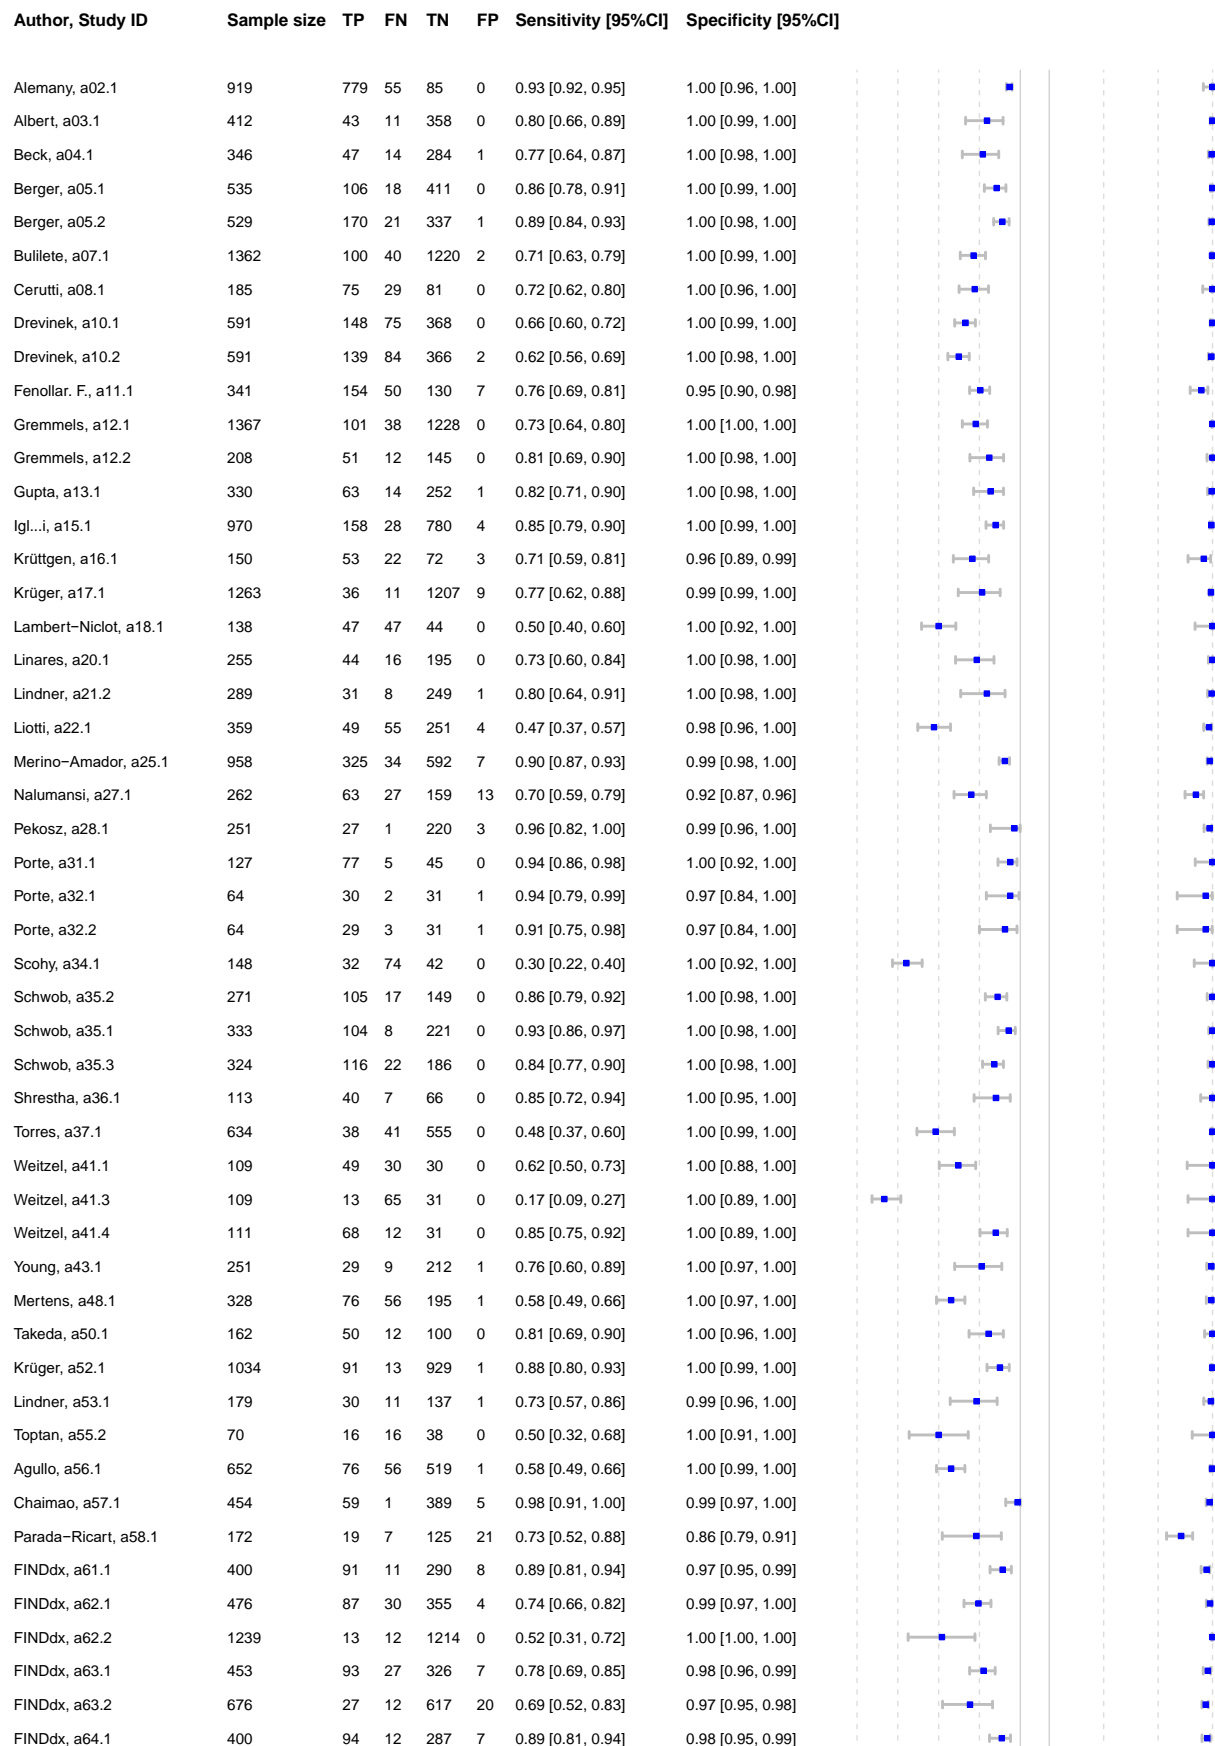

|                     |      |     |     |      |    |                   |                   |
|---------------------|------|-----|-----|------|----|-------------------|-------------------|
| Turcato, f09.1      | 3410 | 179 | 44  | 3157 | 30 | 0.80 [0.74, 0.85] | 0.99 [0.99, 0.99] |
| Takeuchi, f12.1     | 1186 | 91  | 14  | 1081 | 0  | 0.87 [0.79, 0.92] | 1.00 [1.00, 1.00] |
| Filgueiras, f14.1   | 139  | 38  | 17  | 83   | 1  | 0.69 [0.55, 0.81] | 0.99 [0.94, 1.00] |
| Lindner, f15.1      | 146  | 34  | 6   | 105  | 1  | 0.85 [0.70, 0.94] | 0.99 [0.95, 1.00] |
| Halfon, f18.1       | 200  | 72  | 28  | 99   | 1  | 0.72 [0.62, 0.80] | 0.99 [0.95, 1.00] |
| Möckel, f19.1       | 271  | 67  | 22  | 182  | 0  | 0.75 [0.65, 0.84] | 1.00 [0.98, 1.00] |
| Möckel, f19.2       | 202  | 18  | 7   | 176  | 1  | 0.72 [0.51, 0.88] | 0.99 [0.97, 1.00] |
| Osterman, f20.1     | 549  | 115 | 74  | 352  | 8  | 0.61 [0.54, 0.68] | 0.98 [0.96, 0.99] |
| Osterman, f20.2     | 642  | 165 | 91  | 377  | 9  | 0.64 [0.58, 0.70] | 0.98 [0.96, 0.99] |
| Ciotti, f24.1       | 50   | 12  | 27  | 11   | 0  | 0.31 [0.17, 0.48] | 1.00 [0.72, 1.00] |
| Houston, f25.1      | 728  | 242 | 38  | 426  | 22 | 0.86 [0.82, 0.90] | 0.95 [0.93, 0.97] |
| Ngo Nsoga, f28.1    | 402  | 136 | 32  | 232  | 2  | 0.81 [0.74, 0.87] | 0.99 [0.97, 1.00] |
| Torres, f29.1       | 178  | 73  | 18  | 87   | 0  | 0.80 [0.71, 0.88] | 1.00 [0.96, 1.00] |
| Torres, f29.2       | 92   | 15  | 10  | 67   | 0  | 0.60 [0.39, 0.79] | 1.00 [0.95, 1.00] |
| Akingba, f30.1      | 657  | 101 | 44  | 509  | 3  | 0.70 [0.62, 0.77] | 0.99 [0.98, 1.00] |
| Favresse, f31.3     | 188  | 74  | 22  | 89   | 3  | 0.77 [0.67, 0.85] | 0.97 [0.91, 0.99] |
| Favresse, f31.1     | 188  | 64  | 32  | 91   | 1  | 0.67 [0.56, 0.76] | 0.99 [0.94, 1.00] |
| Favresse, f31.2     | 188  | 65  | 31  | 92   | 0  | 0.68 [0.57, 0.77] | 1.00 [0.96, 1.00] |
| Favresse, f31.4     | 188  | 67  | 29  | 92   | 0  | 0.70 [0.60, 0.79] | 1.00 [0.96, 1.00] |
| Kohmer, f32.1       | 100  | 29  | 45  | 25   | 1  | 0.39 [0.28, 0.51] | 0.96 [0.80, 1.00] |
| Kohmer, f32.4       | 100  | 37  | 37  | 26   | 0  | 0.50 [0.38, 0.62] | 1.00 [0.87, 1.00] |
| Kohmer, f32.3       | 100  | 18  | 56  | 26   | 0  | 0.24 [0.15, 0.36] | 1.00 [0.87, 1.00] |
| Kohmer, f32.2       | 100  | 32  | 42  | 26   | 0  | 0.43 [0.32, 0.55] | 1.00 [0.87, 1.00] |
| Baro, f33.2         | 286  | 52  | 49  | 182  | 3  | 0.52 [0.41, 0.62] | 0.98 [0.95, 1.00] |
| Baro, f33.4         | 286  | 46  | 55  | 165  | 20 | 0.46 [0.36, 0.56] | 0.89 [0.84, 0.93] |
| Baro, f33.1         | 286  | 39  | 62  | 184  | 1  | 0.39 [0.29, 0.49] | 1.00 [0.97, 1.00] |
| Baro, f33.3         | 286  | 44  | 57  | 178  | 7  | 0.44 [0.34, 0.54] | 0.96 [0.92, 0.98] |
| Baro, f33.5         | 286  | 29  | 72  | 181  | 4  | 0.29 [0.20, 0.39] | 0.98 [0.95, 0.99] |
| Caruana, f34.4      | 532  | 47  | 67  | 417  | 1  | 0.41 [0.32, 0.51] | 1.00 [0.99, 1.00] |
| Caruana, f34.3      | 532  | 55  | 59  | 416  | 2  | 0.48 [0.39, 0.58] | 1.00 [0.98, 1.00] |
| Caruana, f34.2      | 532  | 47  | 67  | 416  | 2  | 0.41 [0.32, 0.51] | 1.00 [0.98, 1.00] |
| Caruana, f34.1      | 532  | 47  | 67  | 417  | 1  | 0.41 [0.32, 0.51] | 1.00 [0.99, 1.00] |
| Nikolai, f35.3      | 96   | 31  | 3   | 62   | 0  | 0.91 [0.76, 0.98] | 1.00 [0.94, 1.00] |
| Pena, f36.1         | 842  | 51  | 22  | 766  | 3  | 0.70 [0.58, 0.80] | 1.00 [0.99, 1.00] |
| FINDdx, f39.1       | 232  | 30  | 11  | 191  | 0  | 0.73 [0.57, 0.86] | 1.00 [0.98, 1.00] |
| FINDdx, f41.1       | 328  | 48  | 8   | 272  | 0  | 0.86 [0.74, 0.94] | 1.00 [0.99, 1.00] |
| FINDdx, f42.2       | 281  | 40  | 4   | 235  | 2  | 0.91 [0.78, 0.98] | 0.99 [0.97, 1.00] |
| Drain, f43.2        | 255  | 39  | 1   | 210  | 5  | 0.98 [0.87, 1.00] | 0.98 [0.95, 0.99] |
| Ristic, f44.1       | 120  | 25  | 18  | 77   | 0  | 0.58 [0.42, 0.73] | 1.00 [0.95, 1.00] |
| Jääskeläinen, f50.3 | 190  | 126 | 26  | 38   | 0  | 0.83 [0.76, 0.88] | 1.00 [0.91, 1.00] |
| Jääskeläinen, f50.1 | 188  | 119 | 29  | 40   | 0  | 0.80 [0.73, 0.86] | 1.00 [0.91, 1.00] |
| Jääskeläinen, f50.2 | 198  | 128 | 30  | 40   | 0  | 0.81 [0.74, 0.87] | 1.00 [0.91, 1.00] |
| Pérez-García, f52.1 | 320  | 91  | 79  | 150  | 0  | 0.54 [0.46, 0.61] | 1.00 [0.98, 1.00] |
| Pérez-García, f52.2 | 320  | 102 | 68  | 150  | 0  | 0.60 [0.52, 0.67] | 1.00 [0.98, 1.00] |
| Salvagno, f54.1     | 321  | 108 | 41  | 171  | 1  | 0.72 [0.65, 0.80] | 0.99 [0.97, 1.00] |
| Villaverde, f55.1   | 1620 | 35  | 42  | 1540 | 3  | 0.46 [0.34, 0.57] | 1.00 [0.99, 1.00] |
| Young, f56.1        | 786  | 133 | 81  | 572  | 0  | 0.62 [0.55, 0.69] | 1.00 [0.99, 1.00] |
| Shidlovskaya, f61.1 | 106  | 44  | 34  | 28   | 0  | 0.56 [0.45, 0.68] | 1.00 [0.88, 1.00] |
| Shidlovskaya, f61.2 | 106  | 41  | 37  | 27   | 1  | 0.53 [0.41, 0.64] | 0.96 [0.82, 1.00] |
| Faico-Filho, f63.1  | 127  | 59  | 11  | 56   | 1  | 0.84 [0.74, 0.92] | 0.98 [0.91, 1.00] |
| Schuit, f64.1       | 2678 | 149 | 84  | 2436 | 9  | 0.64 [0.57, 0.70] | 1.00 [0.99, 1.00] |
| Schuit, f64.2       | 1596 | 83  | 49  | 1456 | 8  | 0.63 [0.54, 0.71] | 1.00 [0.99, 1.00] |
| Stokes, f65.1       | 1641 | 231 | 37  | 1371 | 2  | 0.86 [0.81, 0.90] | 1.00 [1.00, 1.00] |
| Bouassa, f67.1      | 150  | 90  | 10  | 50   | 0  | 0.90 [0.82, 0.95] | 1.00 [0.93, 1.00] |
| Kernéis, f69.1      | 1109 | 81  | 5   | 1013 | 10 | 0.94 [0.87, 0.98] | 0.99 [0.98, 1.00] |
| L...Huillier, f72.1 | 822  | 78  | 41  | 702  | 1  | 0.66 [0.56, 0.74] | 1.00 [0.99, 1.00] |
| Homza, f87.1        | 318  | 81  | 26  | 204  | 7  | 0.76 [0.66, 0.84] | 0.97 [0.93, 0.99] |
| Homza, f87.2        | 225  | 52  | 38  | 133  | 2  | 0.58 [0.47, 0.68] | 0.98 [0.95, 1.00] |
| Homza, f87.3        | 191  | 54  | 23  | 64   | 50 | 0.70 [0.59, 0.80] | 0.56 [0.47, 0.65] |
| Homza, f87.4        | 139  | 26  | 16  | 96   | 1  | 0.62 [0.46, 0.76] | 0.99 [0.94, 1.00] |
| Homza, f87.5        | 268  | 38  | 53  | 170  | 7  | 0.42 [0.32, 0.53] | 0.96 [0.92, 0.98] |
| Thakur, f88.1       | 677  | 29  | 55  | 592  | 1  | 0.34 [0.24, 0.46] | 1.00 [0.99, 1.00] |
| FINDdx, f91.2       | 218  | 71  | 8   | 137  | 2  | 0.90 [0.81, 0.96] | 0.99 [0.95, 1.00] |
| FINDdx, f92.1       | 723  | 88  | 24  | 611  | 0  | 0.79 [0.70, 0.86] | 1.00 [0.99, 1.00] |
| FINDdx, f94.1       | 462  | 61  | 8   | 390  | 3  | 0.88 [0.78, 0.95] | 0.99 [0.98, 1.00] |
| Holzner, f97.1      | 2375 | 379 | 172 | 1816 | 8  | 0.69 [0.65, 0.73] | 1.00 [0.99, 1.00] |
| Homza, f99.1        | 494  | 125 | 39  | 321  | 9  | 0.76 [0.69, 0.82] | 0.97 [0.95, 0.99] |
| Koeleman, f103.2    | 80   | 25  | 15  | 35   | 5  | 0.62 [0.46, 0.77] | 0.88 [0.73, 0.96] |
| Koeleman, f103.3    | 80   | 22  | 18  | 39   | 1  | 0.55 [0.38, 0.71] | 0.98 [0.87, 1.00] |
| Koeleman, f103.6    | 900  | 220 | 80  | 599  | 1  | 0.73 [0.68, 0.78] | 1.00 [0.99, 1.00] |
| Koeleman, f103.1    | 80   | 29  | 11  | 40   | 0  | 0.72 [0.56, 0.85] | 1.00 [0.91, 1.00] |

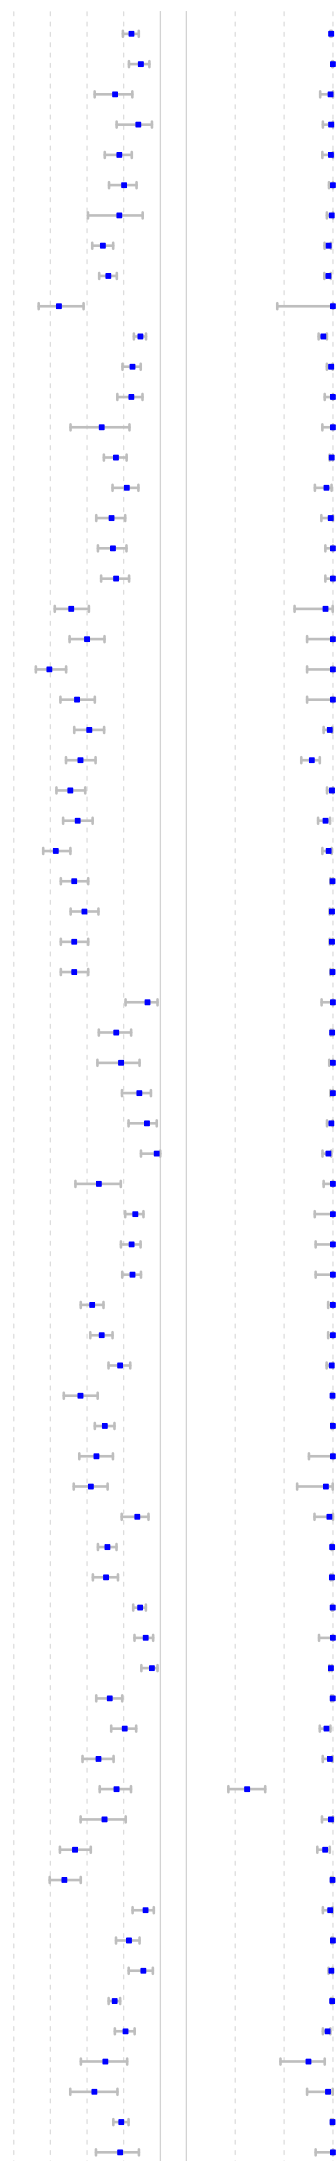

|                              |      |     |     |      |    |                   |                   |
|------------------------------|------|-----|-----|------|----|-------------------|-------------------|
| Caramello, f108.2            | 149  | 84  | 13  | 46   | 6  | 0.87 [0.78, 0.93] | 0.88 [0.77, 0.96] |
| Caramello, f108.1            | 175  | 84  | 29  | 61   | 1  | 0.74 [0.65, 0.82] | 0.98 [0.91, 1.00] |
| Pérez...García, f111.1       | 356  | 102 | 68  | 186  | 0  | 0.60 [0.52, 0.67] | 1.00 [0.98, 1.00] |
| Pérez...García, f111.2       | 356  | 113 | 57  | 181  | 5  | 0.66 [0.59, 0.74] | 0.97 [0.94, 0.99] |
| Bornemann, f112.1            | 1391 | 52  | 39  | 1291 | 9  | 0.57 [0.46, 0.68] | 0.99 [0.99, 1.00] |
| Blairon, f113.2              | 199  | 90  | 60  | 49   | 0  | 0.60 [0.52, 0.68] | 1.00 [0.93, 1.00] |
| Blairon, f113.3              | 198  | 91  | 58  | 49   | 0  | 0.61 [0.53, 0.69] | 1.00 [0.93, 1.00] |
| Blairon, f113.1              | 199  | 89  | 61  | 42   | 7  | 0.59 [0.51, 0.67] | 0.86 [0.73, 0.94] |
| Nordgren, f117.2             | 332  | 124 | 32  | 131  | 45 | 0.80 [0.72, 0.86] | 0.74 [0.67, 0.81] |
| Nordgren, f117.1             | 286  | 112 | 44  | 130  | 0  | 0.72 [0.64, 0.79] | 1.00 [0.97, 1.00] |
| Eleftheriou, f120.1          | 744  | 42  | 9   | 693  | 0  | 0.82 [0.69, 0.92] | 1.00 [1.00, 1.00] |
| Smith, f122.1                | 2887 | 180 | 55  | 2645 | 7  | 0.77 [0.71, 0.82] | 1.00 [1.00, 1.00] |
| Abdul-Mumin, f123.1          | 193  | 27  | 15  | 123  | 28 | 0.64 [0.48, 0.78] | 0.81 [0.74, 0.87] |
| Leixner, f125.1              | 392  | 65  | 29  | 297  | 1  | 0.69 [0.59, 0.78] | 1.00 [0.98, 1.00] |
| Fernandez-Montero, f126.1    | 2543 | 35  | 14  | 2486 | 8  | 0.71 [0.57, 0.83] | 1.00 [0.99, 1.00] |
| Ferté, f129.1                | 688  | 33  | 19  | 636  | 0  | 0.64 [0.49, 0.76] | 1.00 [0.99, 1.00] |
| Terpos, f130.1               | 358  | 102 | 12  | 243  | 1  | 0.90 [0.82, 0.94] | 1.00 [0.98, 1.00] |
| Lee, f136.1                  | 680  | 109 | 271 | 300  | 0  | 0.29 [0.24, 0.34] | 1.00 [0.99, 1.00] |
| Seynaeve, f137.2             | 100  | 31  | 19  | 50   | 0  | 0.62 [0.47, 0.75] | 1.00 [0.93, 1.00] |
| Seynaeve, f137.1             | 100  | 44  | 6   | 50   | 0  | 0.88 [0.76, 0.96] | 1.00 [0.93, 1.00] |
| Lunca, f138.1                | 47   | 23  | 17  | 7    | 0  | 0.58 [0.41, 0.73] | 1.00 [0.59, 1.00] |
| Di Domenico, f140.2          | 433  | 20  | 16  | 397  | 0  | 0.56 [0.38, 0.72] | 1.00 [0.99, 1.00] |
| Carbonell-Sahuquillo, f141.1 | 357  | 24  | 10  | 323  | 0  | 0.71 [0.52, 0.85] | 1.00 [0.99, 1.00] |
| Dankova, f142.1              | 1227 | 14  | 23  | 1190 | 0  | 0.38 [0.22, 0.55] | 1.00 [1.00, 1.00] |
| Van Honacker, f143.1         | 97   | 52  | 6   | 18   | 21 | 0.90 [0.79, 0.96] | 0.46 [0.30, 0.63] |
| Van Honacker, f143.3         | 98   | 48  | 10  | 37   | 3  | 0.83 [0.71, 0.91] | 0.92 [0.80, 0.98] |
| Van Honacker, f143.4         | 97   | 45  | 12  | 40   | 0  | 0.79 [0.66, 0.89] | 1.00 [0.91, 1.00] |
| Van Honacker, f143.5         | 98   | 48  | 10  | 40   | 0  | 0.83 [0.71, 0.91] | 1.00 [0.91, 1.00] |
| Van Honacker, f143.6         | 4195 | 200 | 169 | 3814 | 12 | 0.54 [0.49, 0.59] | 1.00 [1.00, 1.00] |
| Van Honacker, f143.2         | 98   | 39  | 19  | 40   | 0  | 0.67 [0.54, 0.79] | 1.00 [0.91, 1.00] |
| Menchinelli, f145.1          | 2898 | 137 | 63  | 2617 | 81 | 0.69 [0.62, 0.75] | 0.97 [0.96, 0.98] |
| Kipritci, f146.1             | 110  | 21  | 13  | 76   | 0  | 0.62 [0.44, 0.78] | 1.00 [0.95, 1.00] |
| Karon, f148.4                | 347  | 153 | 44  | 146  | 4  | 0.78 [0.71, 0.83] | 0.97 [0.93, 0.99] |
| Karon, f148.3                | 347  | 174 | 23  | 150  | 0  | 0.88 [0.83, 0.92] | 1.00 [0.98, 1.00] |
| Karon, f148.1                | 347  | 131 | 66  | 150  | 0  | 0.66 [0.59, 0.73] | 1.00 [0.98, 1.00] |
| Karon, f148.2                | 347  | 164 | 33  | 150  | 0  | 0.83 [0.77, 0.88] | 1.00 [0.98, 1.00] |
| Wertenaue, f150.2            | 2215 | 192 | 146 | 1875 | 2  | 0.57 [0.51, 0.62] | 1.00 [1.00, 1.00] |
| Wertenaue, f150.1            | 2215 | 204 | 134 | 1872 | 5  | 0.60 [0.55, 0.66] | 1.00 [0.99, 1.00] |
| Kurihara, f152.1             | 1401 | 62  | 21  | 1316 | 2  | 0.75 [0.64, 0.84] | 1.00 [1.00, 1.00] |
| Kim, f155.1                  | 165  | 58  | 7   | 96   | 4  | 0.89 [0.79, 0.96] | 0.96 [0.90, 0.99] |
| Merino-Amador, f160.1        | 450  | 179 | 13  | 256  | 2  | 0.93 [0.89, 0.96] | 0.99 [0.97, 1.00] |
| Kanaujia, f162.1             | 484  | 136 | 53  | 293  | 2  | 0.72 [0.65, 0.78] | 0.99 [0.98, 1.00] |
| Jung, f163.1                 | 308  | 29  | 4   | 271  | 4  | 0.88 [0.72, 0.97] | 0.98 [0.96, 1.00] |
| Fuster Escrivá, f164.1       | 448  | 99  | 18  | 331  | 0  | 0.85 [0.77, 0.91] | 1.00 [0.99, 1.00] |
| Baccani, f165.3              | 81   | 9   | 15  | 57   | 0  | 0.38 [0.19, 0.59] | 1.00 [0.94, 1.00] |
| Baccani, f165.2              | 93   | 10  | 18  | 65   | 0  | 0.36 [0.19, 0.56] | 1.00 [0.94, 1.00] |
| Kahn, f167.1                 | 3110 | 57  | 39  | 2983 | 31 | 0.59 [0.49, 0.69] | 0.99 [0.98, 0.99] |
| Kolwijck, f168.1             | 433  | 39  | 6   | 388  | 0  | 0.87 [0.73, 0.95] | 1.00 [0.99, 1.00] |
| Ilko, f169.1                 | 125  | 20  | 3   | 90   | 12 | 0.87 [0.66, 0.97] | 0.88 [0.80, 0.94] |
| Jegerlehner, f172.1          | 1462 | 92  | 49  | 1319 | 2  | 0.65 [0.57, 0.73] | 1.00 [1.00, 1.00] |
| Onsongo, f174.1              | 997  | 109 | 43  | 824  | 21 | 0.72 [0.64, 0.79] | 0.98 [0.96, 0.98] |
| FINDdx, f176.1               | 120  | 33  | 21  | 66   | 0  | 0.61 [0.47, 0.74] | 1.00 [0.95, 1.00] |
| FINDdx, f177.2               | 108  | 39  | 15  | 53   | 1  | 0.72 [0.58, 0.84] | 0.98 [0.90, 1.00] |
| FINDdx, f177.1               | 391  | 50  | 42  | 296  | 3  | 0.54 [0.44, 0.65] | 0.99 [0.97, 1.00] |
| FINDdx, f179.1               | 227  | 72  | 46  | 109  | 0  | 0.61 [0.52, 0.70] | 1.00 [0.97, 1.00] |
| FINDdx, f181.1               | 333  | 59  | 50  | 218  | 6  | 0.54 [0.44, 0.64] | 0.97 [0.94, 0.99] |
| FINDdx, f181.2               | 335  | 71  | 29  | 234  | 1  | 0.71 [0.61, 0.80] | 1.00 [0.98, 1.00] |
| FINDdx, f182.1               | 214  | 66  | 12  | 135  | 1  | 0.85 [0.75, 0.92] | 0.99 [0.96, 1.00] |
| Kim, f186.1                  | 130  | 27  | 3   | 98   | 2  | 0.90 [0.74, 0.98] | 0.98 [0.93, 1.00] |
| Kim, f186.2                  | 200  | 94  | 6   | 100  | 0  | 0.94 [0.87, 0.98] | 1.00 [0.96, 1.00] |
| Korenkov, f187.1             | 1849 | 89  | 101 | 1657 | 2  | 0.47 [0.40, 0.54] | 1.00 [1.00, 1.00] |
| Mayanskiy, f188.1            | 277  | 164 | 18  | 72   | 23 | 0.90 [0.85, 0.94] | 0.76 [0.66, 0.84] |
| Fourati, f190.6              | 634  | 178 | 119 | 337  | 0  | 0.60 [0.54, 0.66] | 1.00 [0.99, 1.00] |
| Fourati, f190.1              | 634  | 105 | 192 | 337  | 0  | 0.35 [0.30, 0.41] | 1.00 [0.99, 1.00] |
| Fourati, f190.5              | 634  | 97  | 200 | 332  | 5  | 0.33 [0.27, 0.38] | 0.98 [0.97, 1.00] |
| Fourati, f190.3              | 634  | 163 | 134 | 337  | 0  | 0.55 [0.49, 0.61] | 1.00 [0.99, 1.00] |
| Fourati, f190.2              | 634  | 180 | 117 | 314  | 23 | 0.61 [0.55, 0.66] | 0.93 [0.90, 0.96] |
| Fourati, f190.4              | 634  | 183 | 114 | 337  | 0  | 0.62 [0.56, 0.67] | 1.00 [0.99, 1.00] |
| Orsi, f191.2                 | 110  | 52  | 8   | 50   | 0  | 0.87 [0.75, 0.94] | 1.00 [0.93, 1.00] |
| Orsi, f191.1                 | 110  | 56  | 4   | 50   | 0  | 0.93 [0.84, 0.98] | 1.00 [0.93, 1.00] |
| Suzuki, f194.2               | 1127 | 58  | 16  | 1028 | 25 | 0.78 [0.67, 0.87] | 0.98 [0.96, 0.98] |
| Suzuki, f194.1               | 1127 | 53  | 21  | 1045 | 8  | 0.72 [0.60, 0.81] | 0.99 [0.98, 1.00] |
| Thirion-Romero, f195.1       | 1064 | 258 | 216 | 581  | 9  | 0.54 [0.50, 0.59] | 0.98 [0.97, 0.99] |
| Cento, f196.1                | 960  | 297 | 50  | 596  | 17 | 0.86 [0.81, 0.89] | 0.97 [0.96, 0.98] |

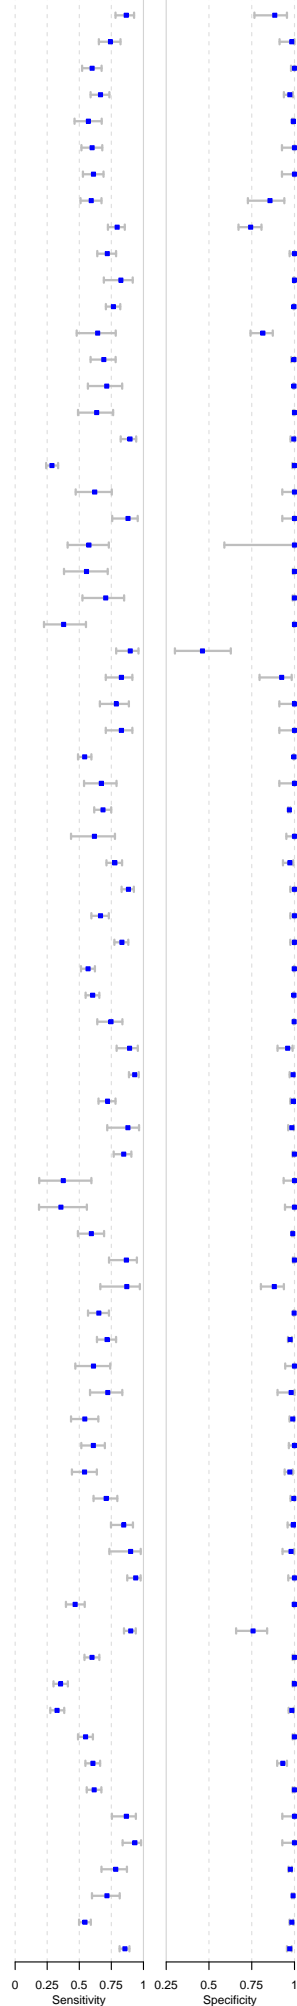

### Fig C - Forest plots for oropharyngeal samples

Author, Study ID Sample size TP FN TN FP Sensitivity [95%CI] Specificity [95%CI]

| Author, Study ID | Sample size | TP  | FN | TN   | FP | Sensitivity [95%CI] | Specificity [95%CI] |
|------------------|-------------|-----|----|------|----|---------------------|---------------------|
| Ngo Nsoga, f28.1 | 402         | 136 | 32 | 232  | 2  | 0.81 [0.74, 0.87]   | 0.99 [0.97, 1.00]   |
| Kahn, f167.1     | 3110        | 57  | 39 | 2983 | 31 | 0.59 [0.49, 0.69]   | 0.99 [0.98, 0.99]   |

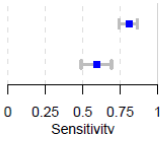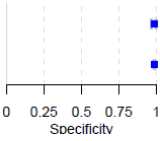

Supplement: pmed.1004011.s007.pdf [file pmed.1004011.s007.pdf]
