# Supplementary material for: Accuracy of rapid point-of-care antigen-based diagnostics for SARS-CoV-2: An updated systematic review and meta-analysis with meta-regression analyzing influencing factors
Source: PubMed Central journal article supplement (PMC9187092; doi:10.1371/journal.pmed.1004011), 2022-05-26

S2 Fig. Details of QUADAS assessment.

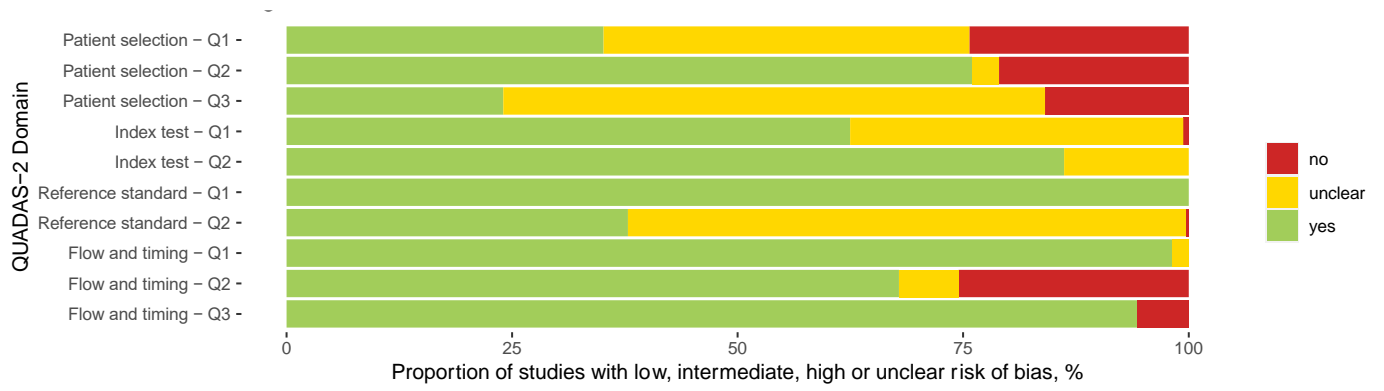

Supplement: pmed.1004011.s003.pdf [file pmed.1004011.s003.pdf]
