# Supplementary material for: Accuracy of rapid point-of-care antigen-based diagnostics for SARS-CoV-2: An updated systematic review and meta-analysis with meta-regression analyzing influencing factors
Source: PubMed Central journal article supplement (PMC9187092; doi:10.1371/journal.pmed.1004011), 2022-05-26

**S3 Fig. Forest plots for subgroup analysis by Ct-values.**

Caption: CI = confidence interval

**Fig A – Forest plots for Ct-values lower 20**

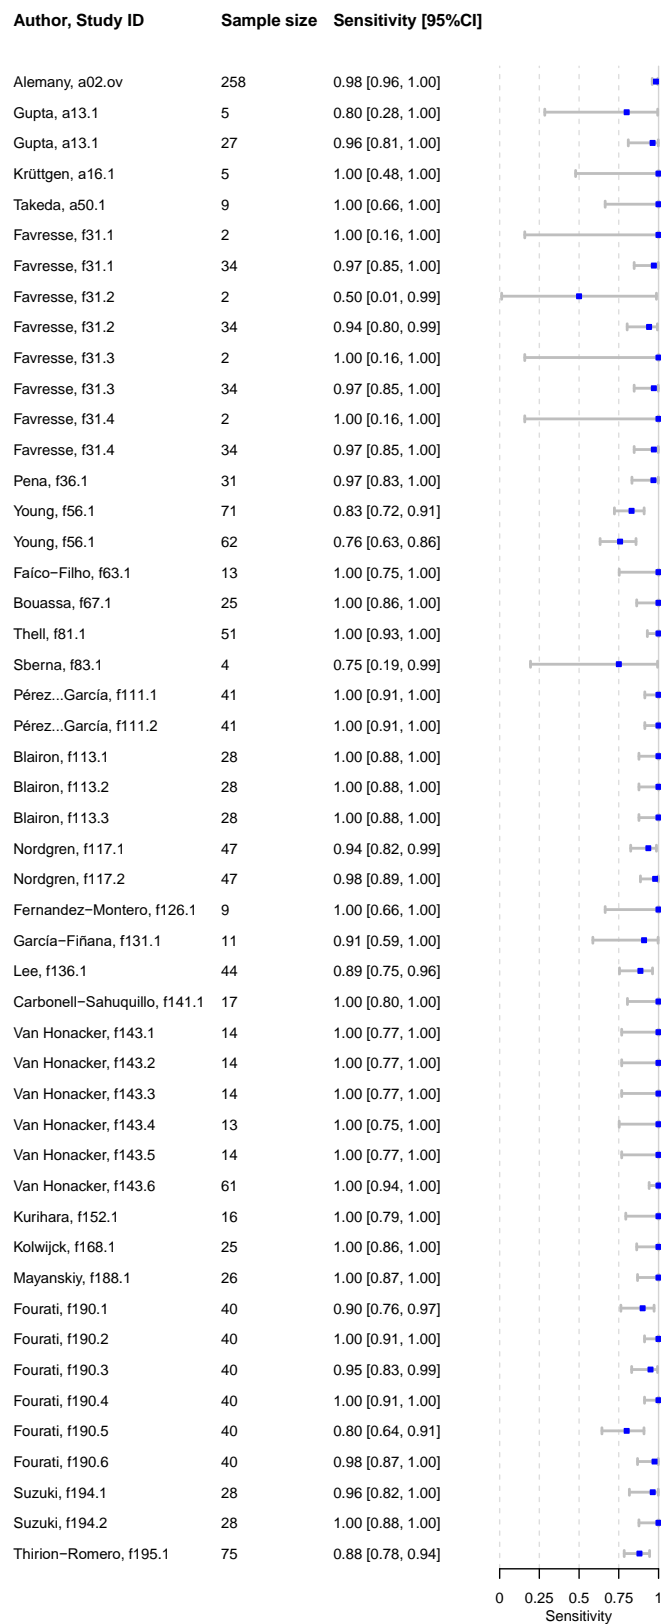

Fig B – Forest plots for Ct-values greater 20

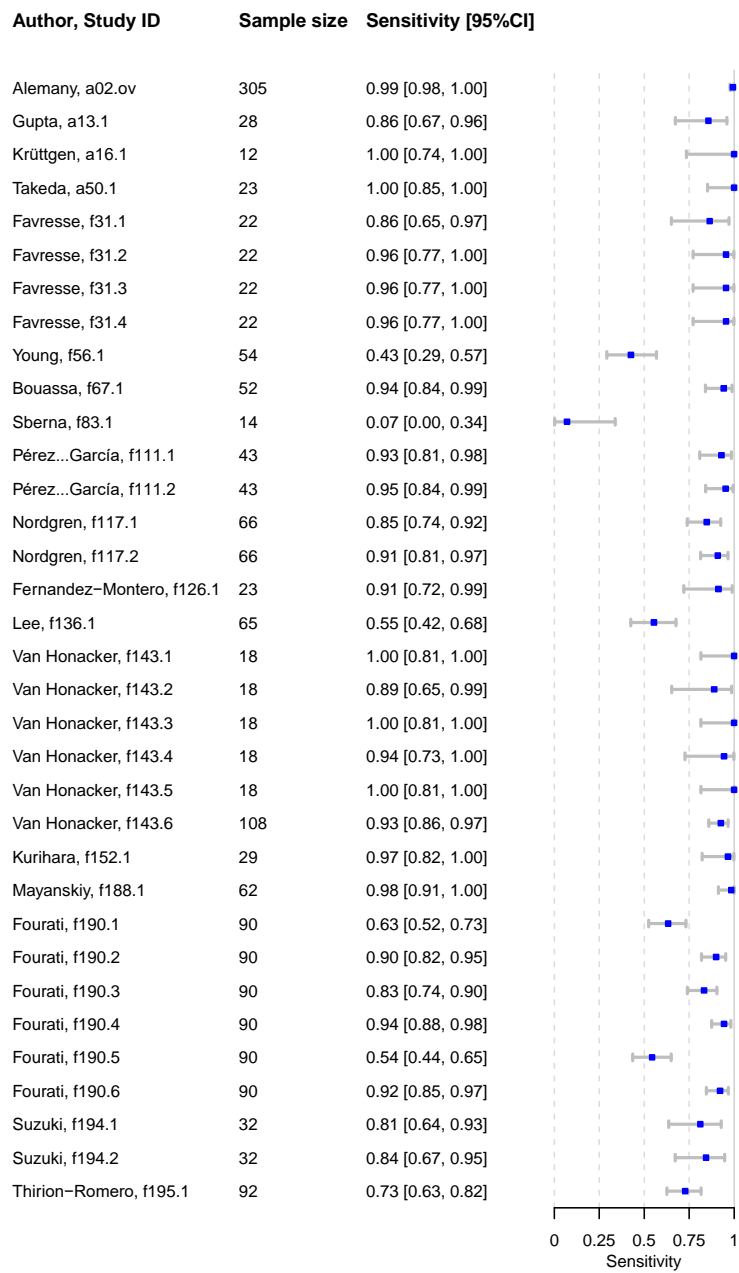

Fig C – Forest plots for Ct-values lower 25

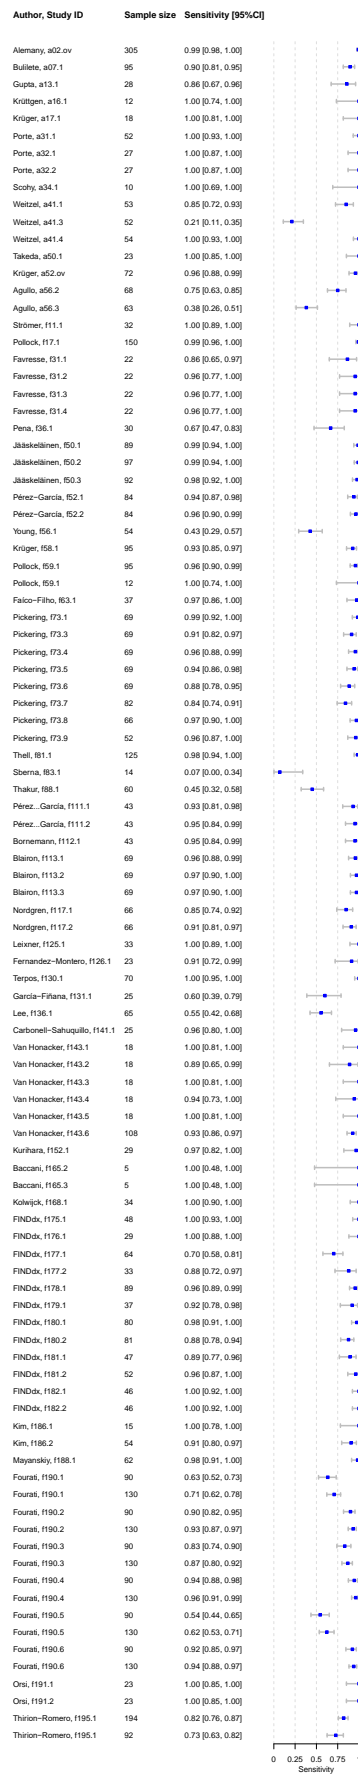

Fig D – Forest plots for Ct-values greater 25

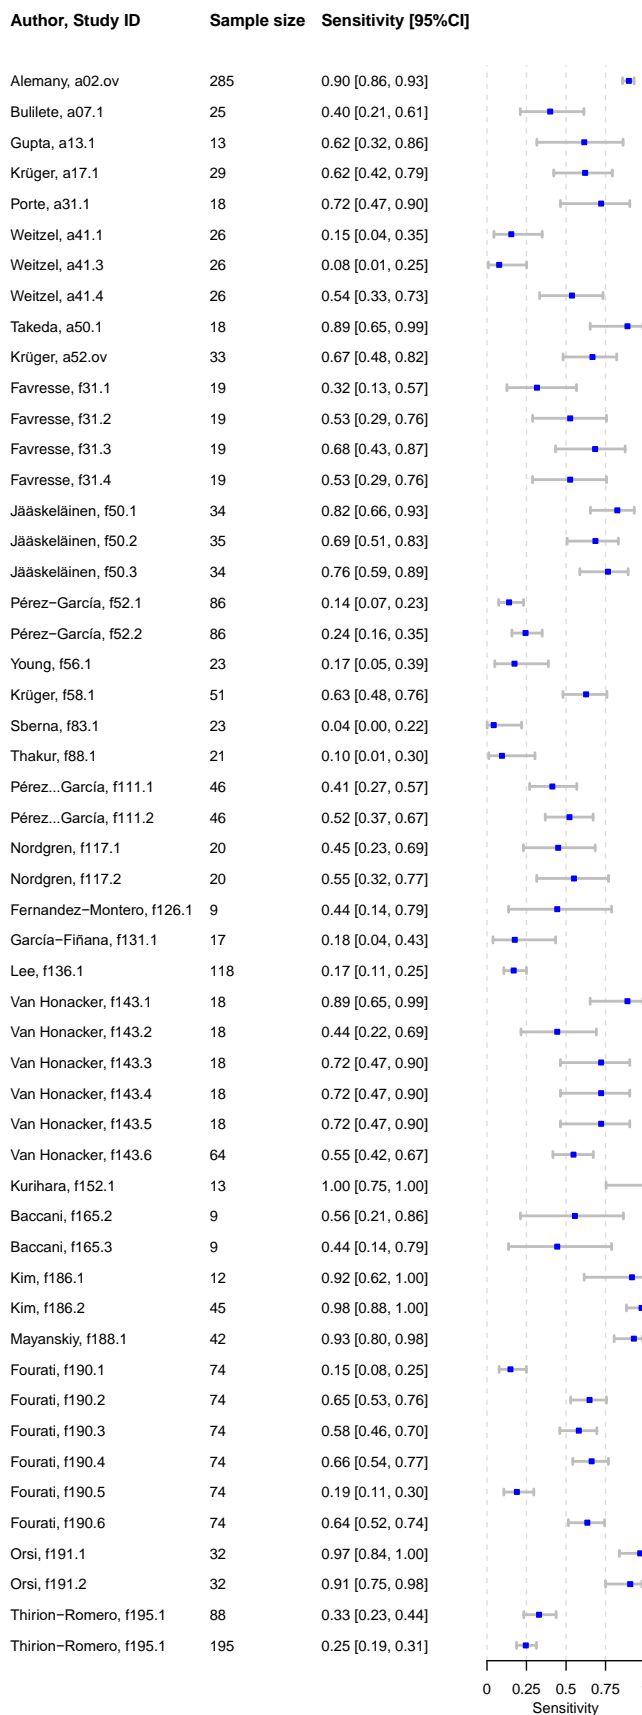

Fig E – Forest plots for Ct-values lower 30

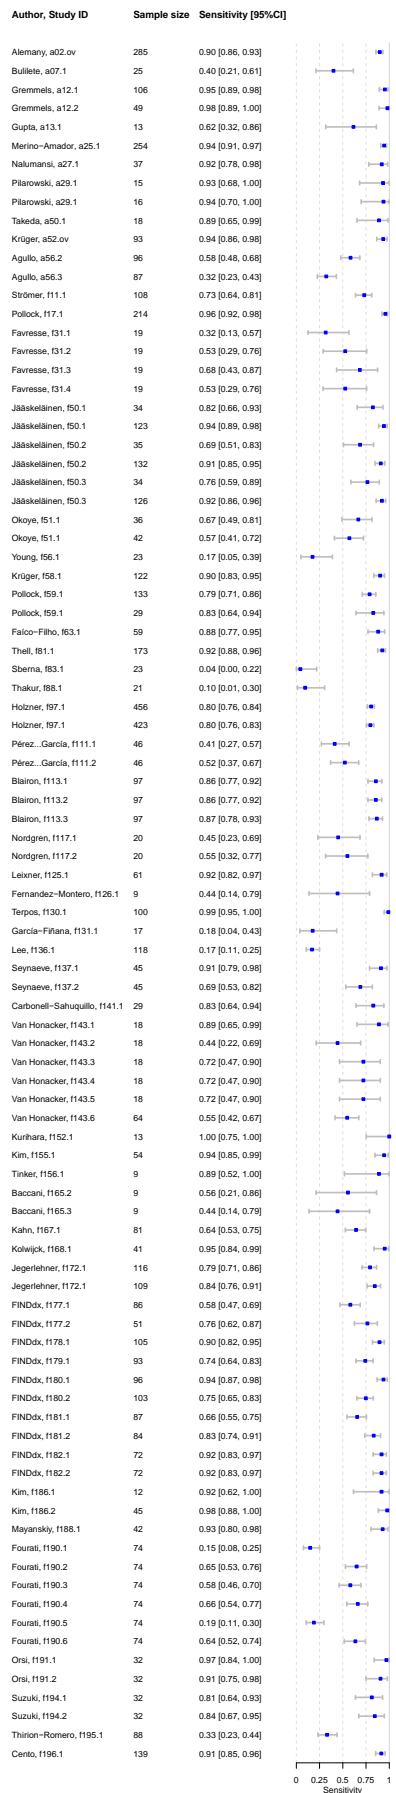

Fig F – Forest plots for Ct-values greater 30

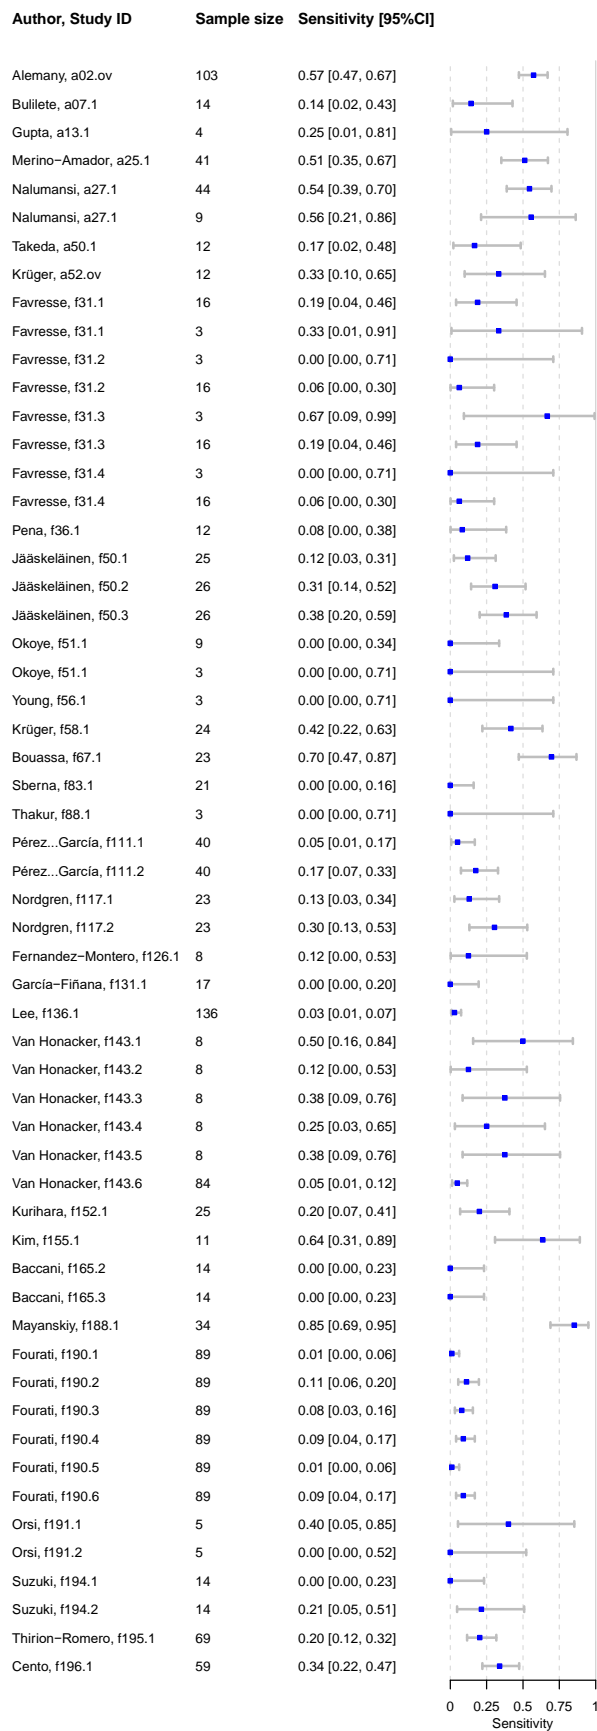

Supplement: pmed.1004011.s004.pdf [file pmed.1004011.s004.pdf]
