# Supplementary material for: Accuracy of rapid point-of-care antigen-based diagnostics for SARS-CoV-2: An updated systematic review and meta-analysis with meta-regression analyzing influencing factors
Source: PubMed Central journal article supplement (PMC9187092; doi:10.1371/journal.pmed.1004011), 2022-05-26

S4 Fig. Forest plots for subgroup analysis by Ct-values per test.

Caption: CI = confidence interval

Fig A – Forest plots for Ct-value lower 20

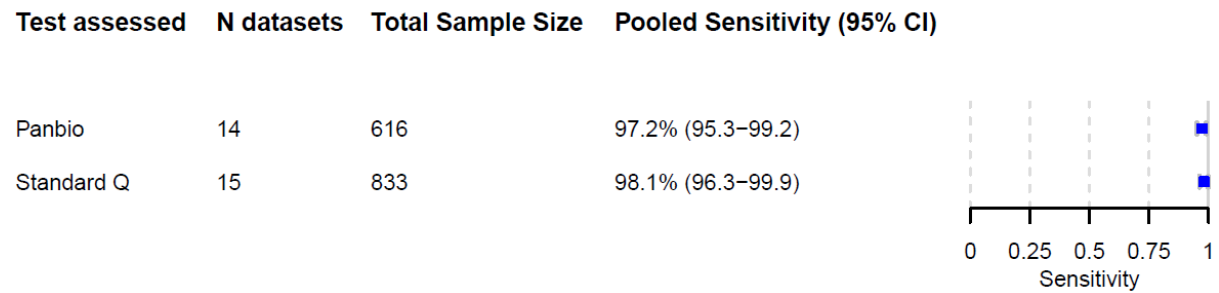

Fig B – Forest plots for Ct-value greater 20

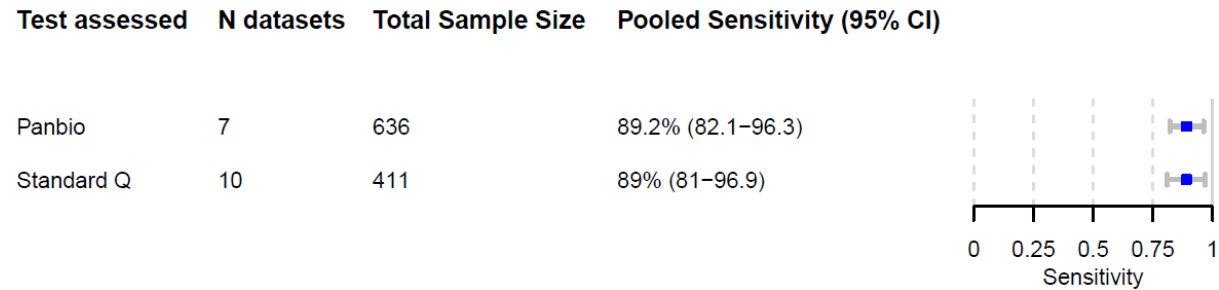

Fig C – Forest plots for Ct-value lower 25

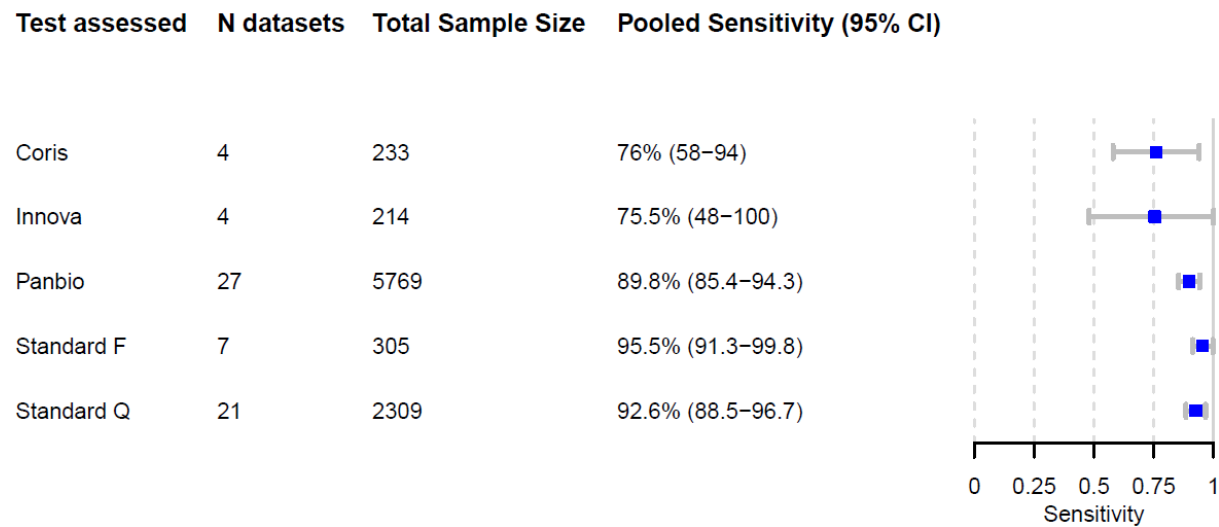

Fig D – Forest plots for Ct-value greater 25

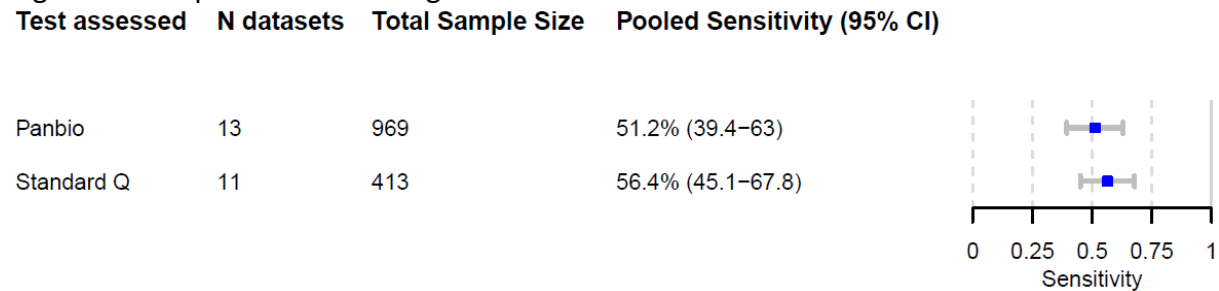

Fig E – Forest plots for Ct-value lower 30

**Test assessed    N datasets    Total Sample Size    Pooled Sensitivity (95% CI)**

|            |    |      |                   |
|------------|----|------|-------------------|
| BinaxNow   | 6  | 332  | 83% (69.5–96.5)   |
| LumiraDx   | 6  | 358  | 92.6% (86.8–98.5) |
| Panbio     | 31 | 5993 | 73.7% (66–81.3)   |
| Standard F | 8  | 475  | 77.1% (65.8–88.3) |
| Standard Q | 25 | 5477 | 75.7% (67.9–83.4) |

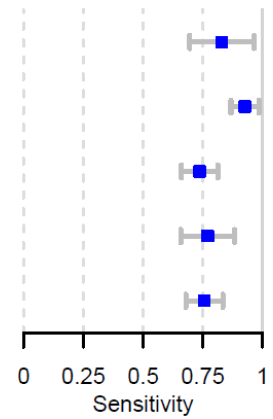

**Fig F – Forest plots for Ct-value greater 30**

**Test assessed    N datasets    Total Sample Size    Pooled Sensitivity (95% CI)**

|            |    |     |                   |
|------------|----|-----|-------------------|
| LumiraDx   | 4  | 83  | 36% (26.1–45.9)   |
| Panbio     | 13 | 444 | 22.8% (12.2–33.4) |
| Standard Q | 15 | 499 | 20.4% (10.5–30.3) |

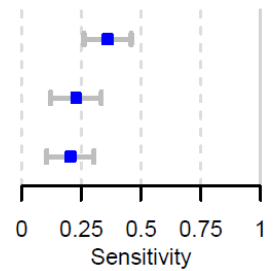

Supplement: pmed.1004011.s005.pdf [file pmed.1004011.s005.pdf]
