# Supplementary material for: Accuracy of rapid point-of-care antigen-based diagnostics for SARS-CoV-2: An updated systematic review and meta-analysis with meta-regression analyzing influencing factors
Source: PubMed Central journal article supplement (PMC9187092; doi:10.1371/journal.pmed.1004011), 2022-05-26

**S7 Fig. Forest plots for subgroup analysis by symptomatic vs. asymptomatic.**

Caption: CI = confidence interval

Figure A - Forest plots of asymptomatic patients

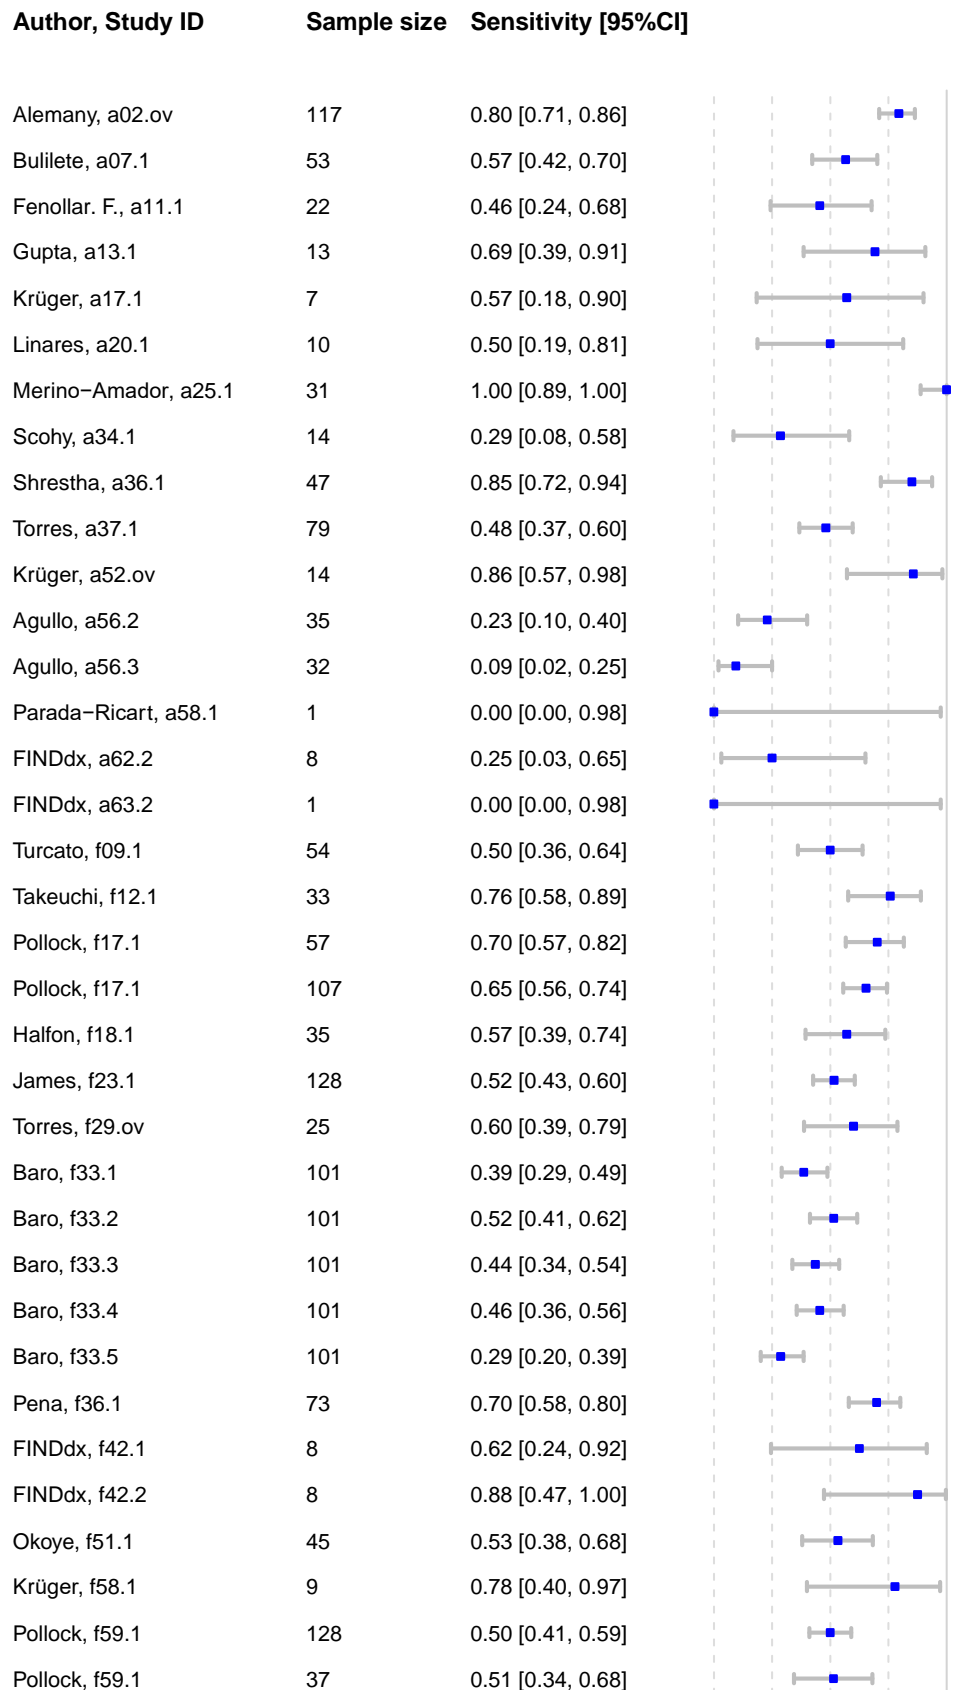

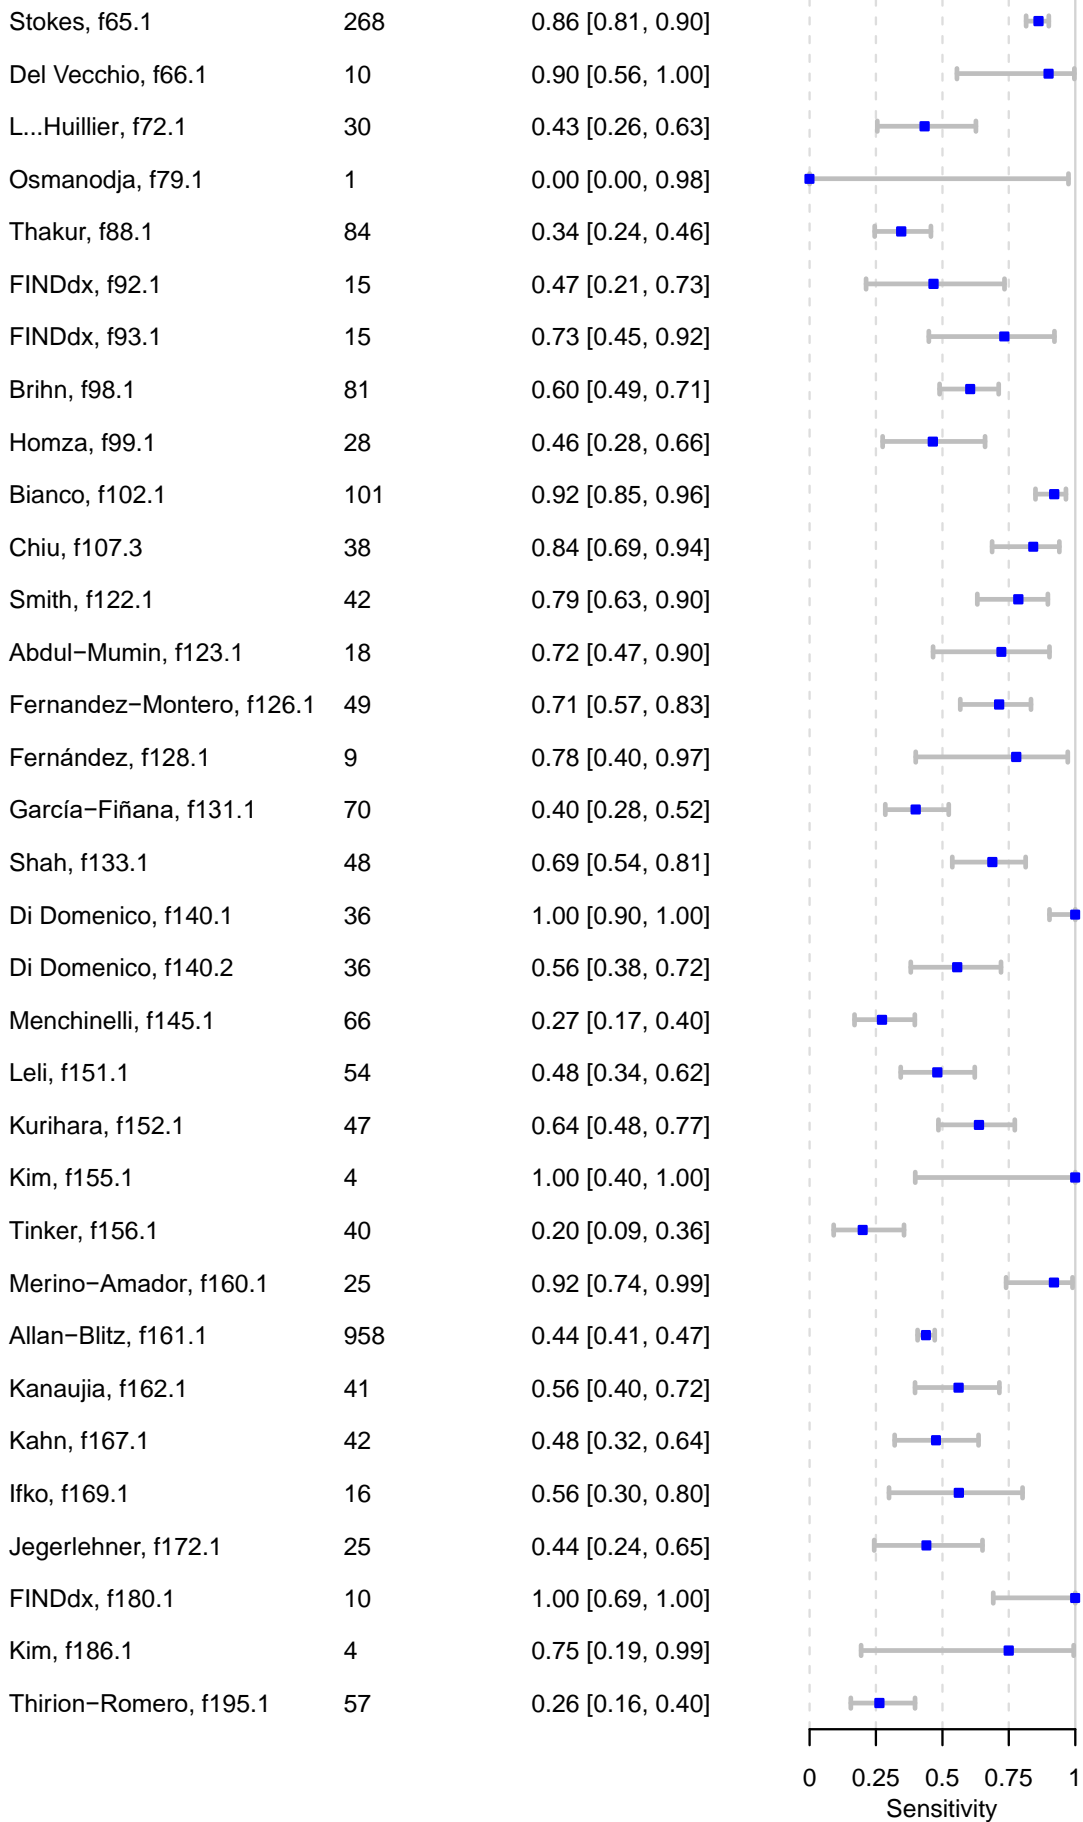

Figure B - Forest plots of symptomatic patients

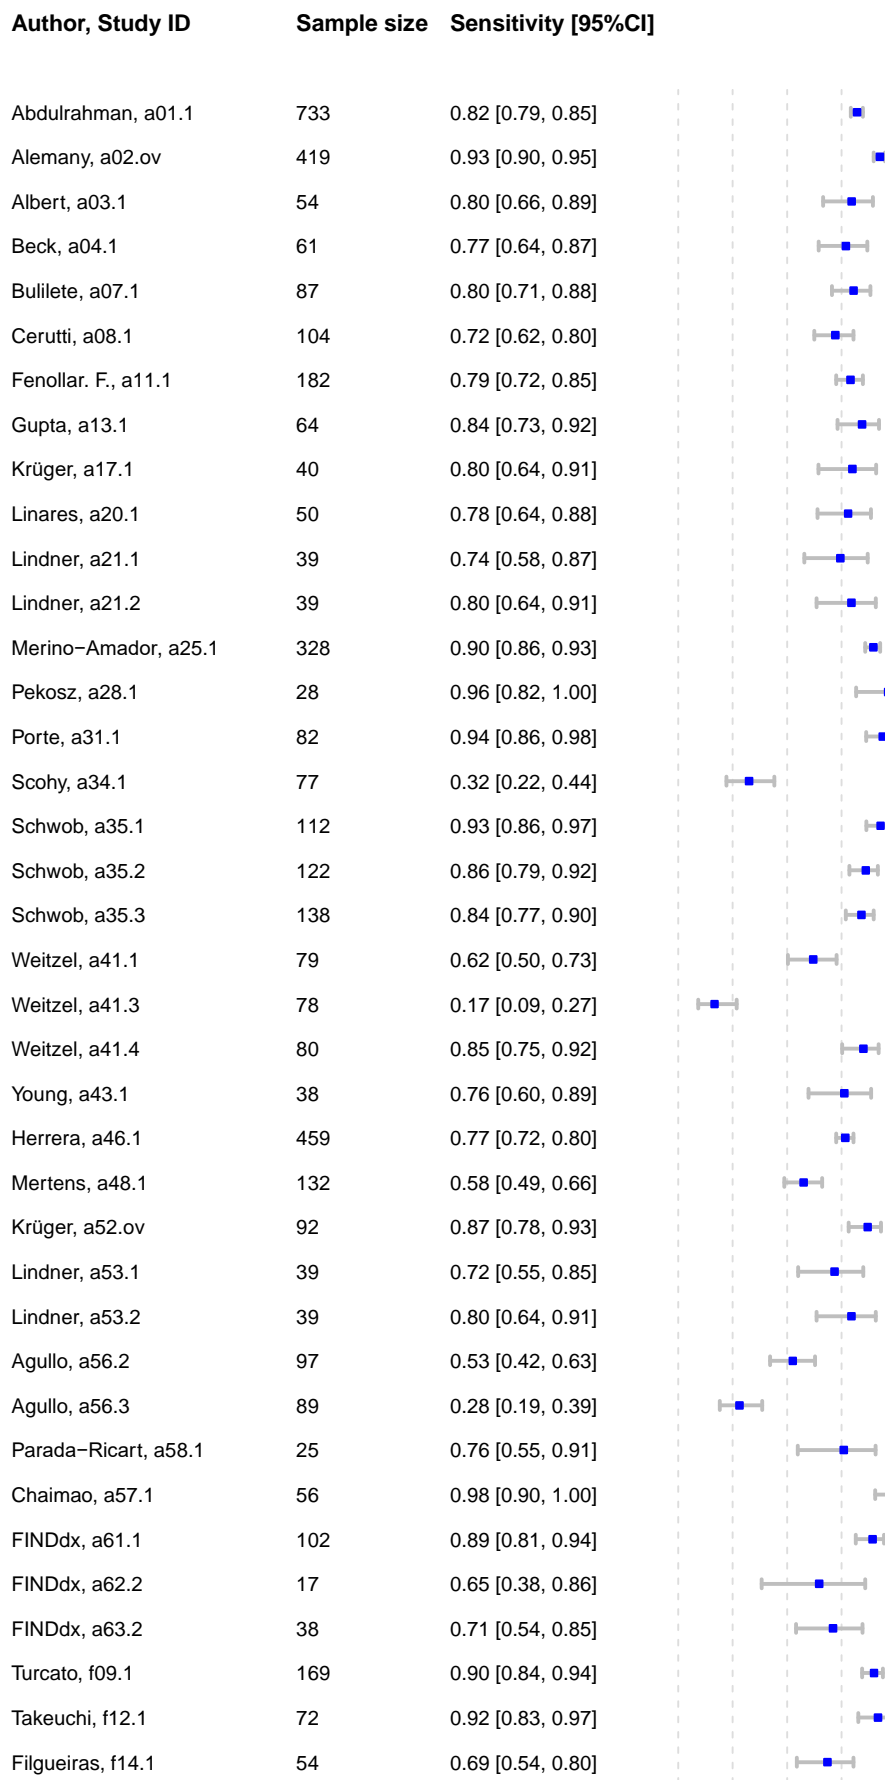

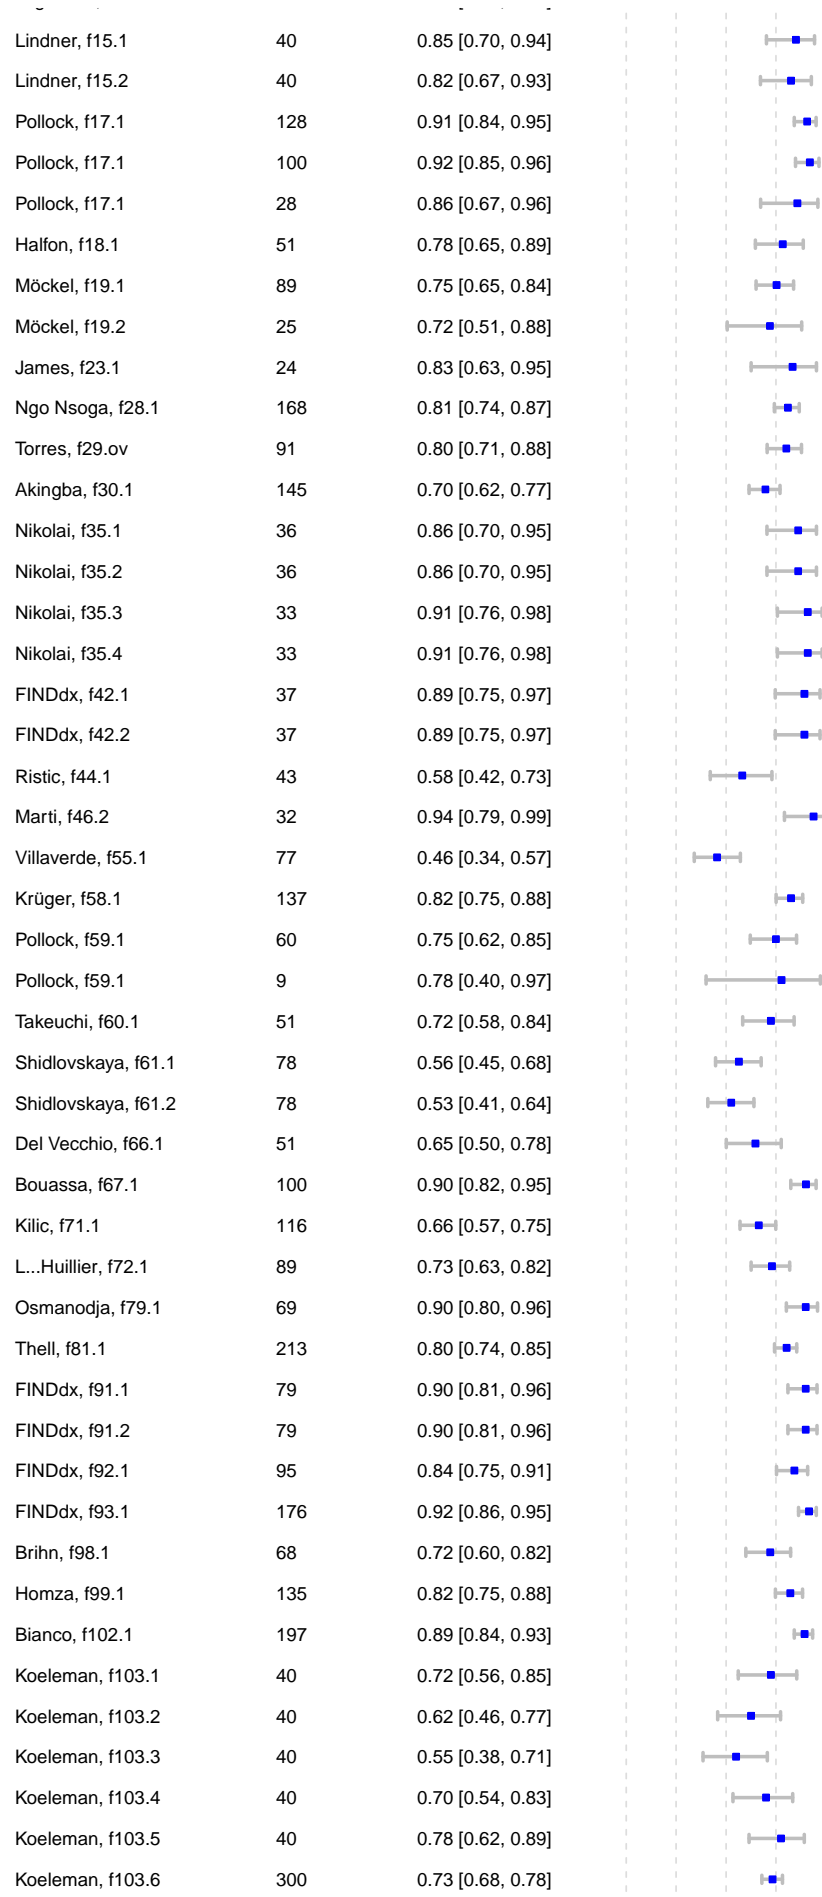

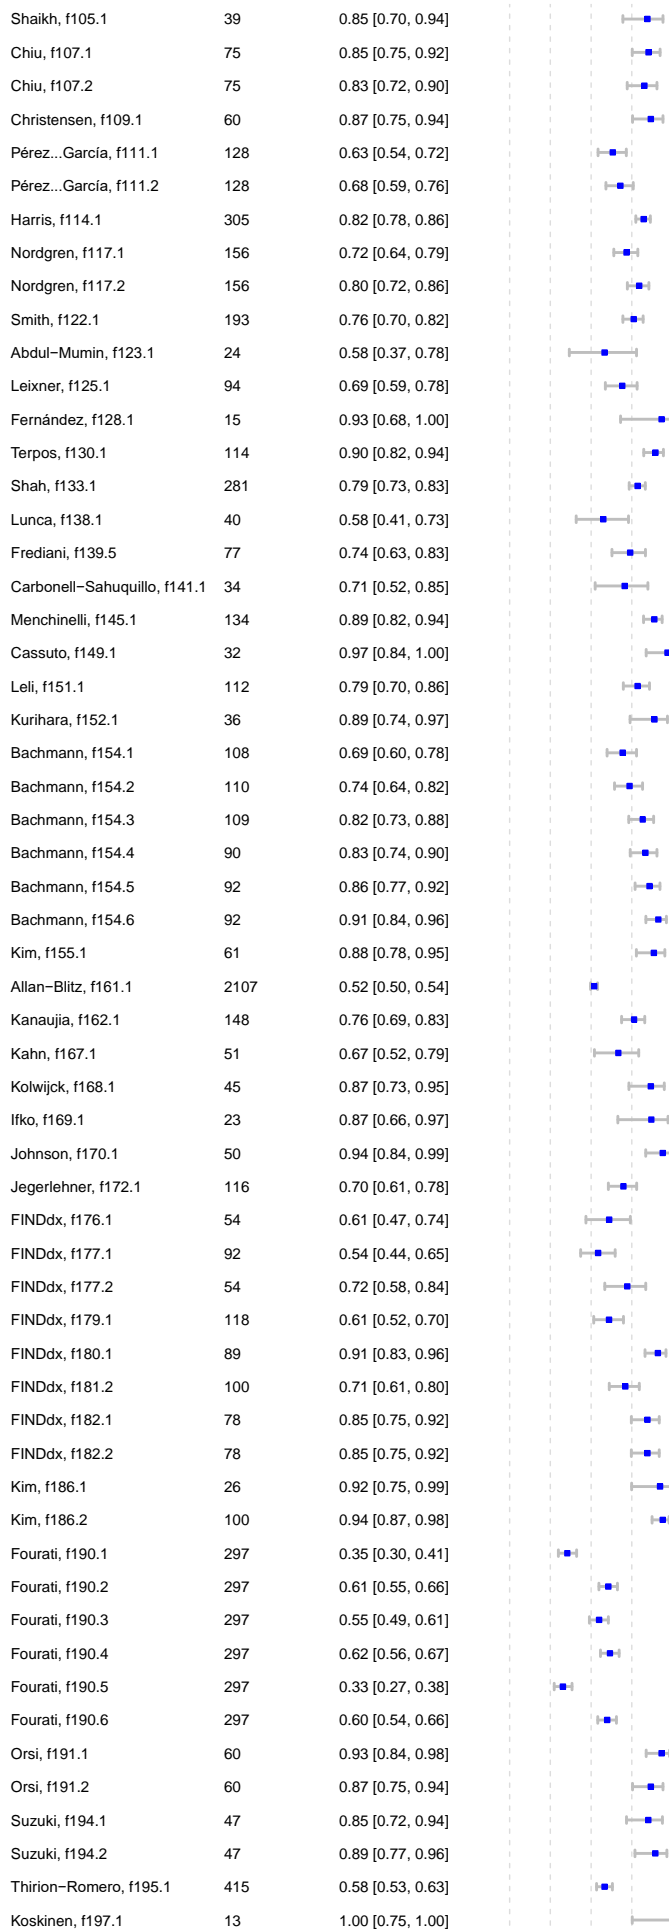

Figure C - Forest plots of patients with symptom onset greater than seven days

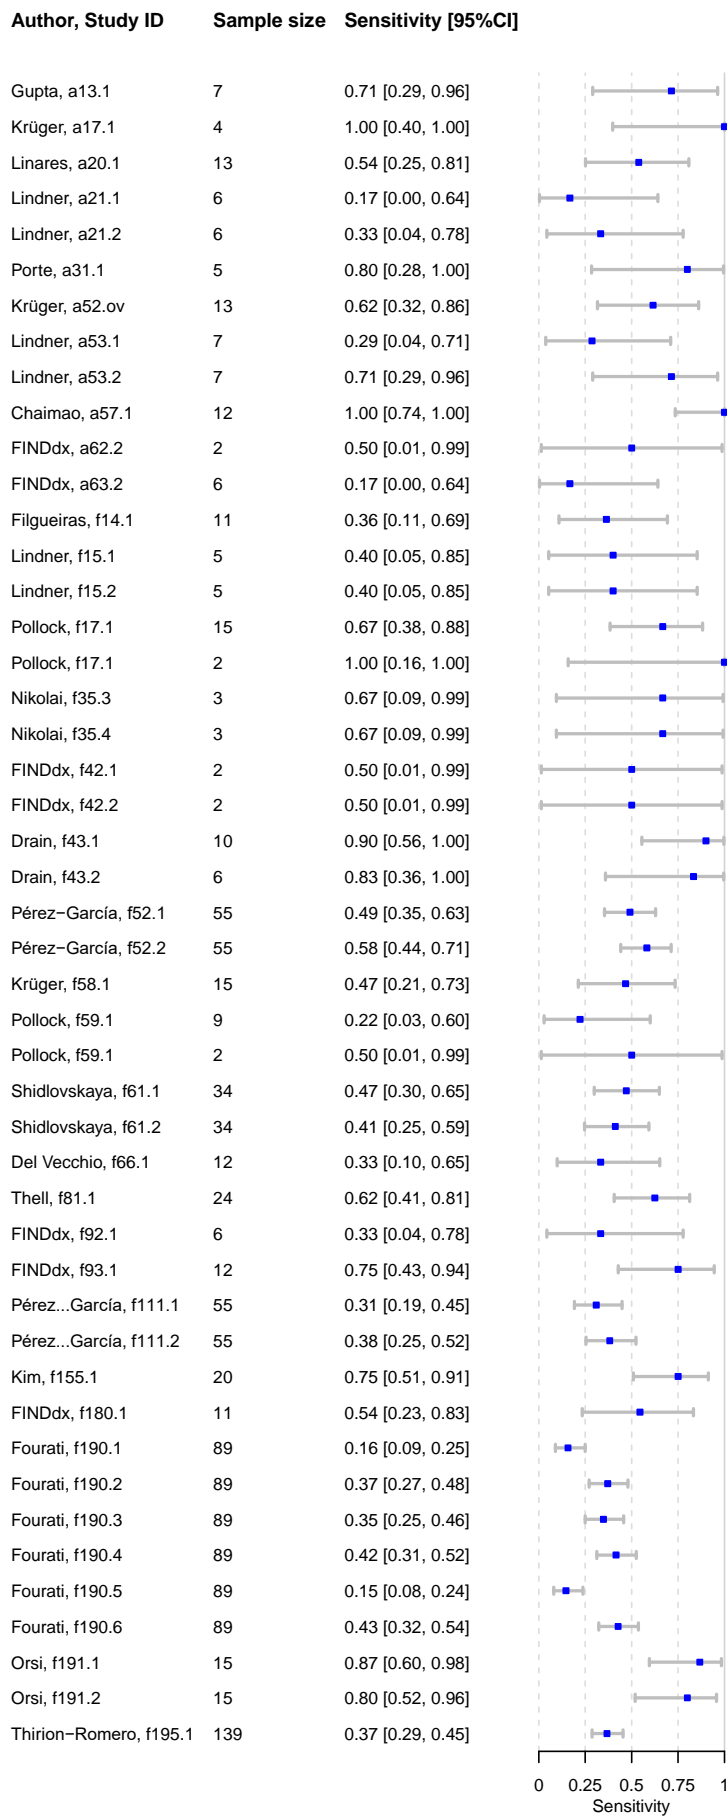

Figure D - Forest plots of patients with symptom onset less than seven days

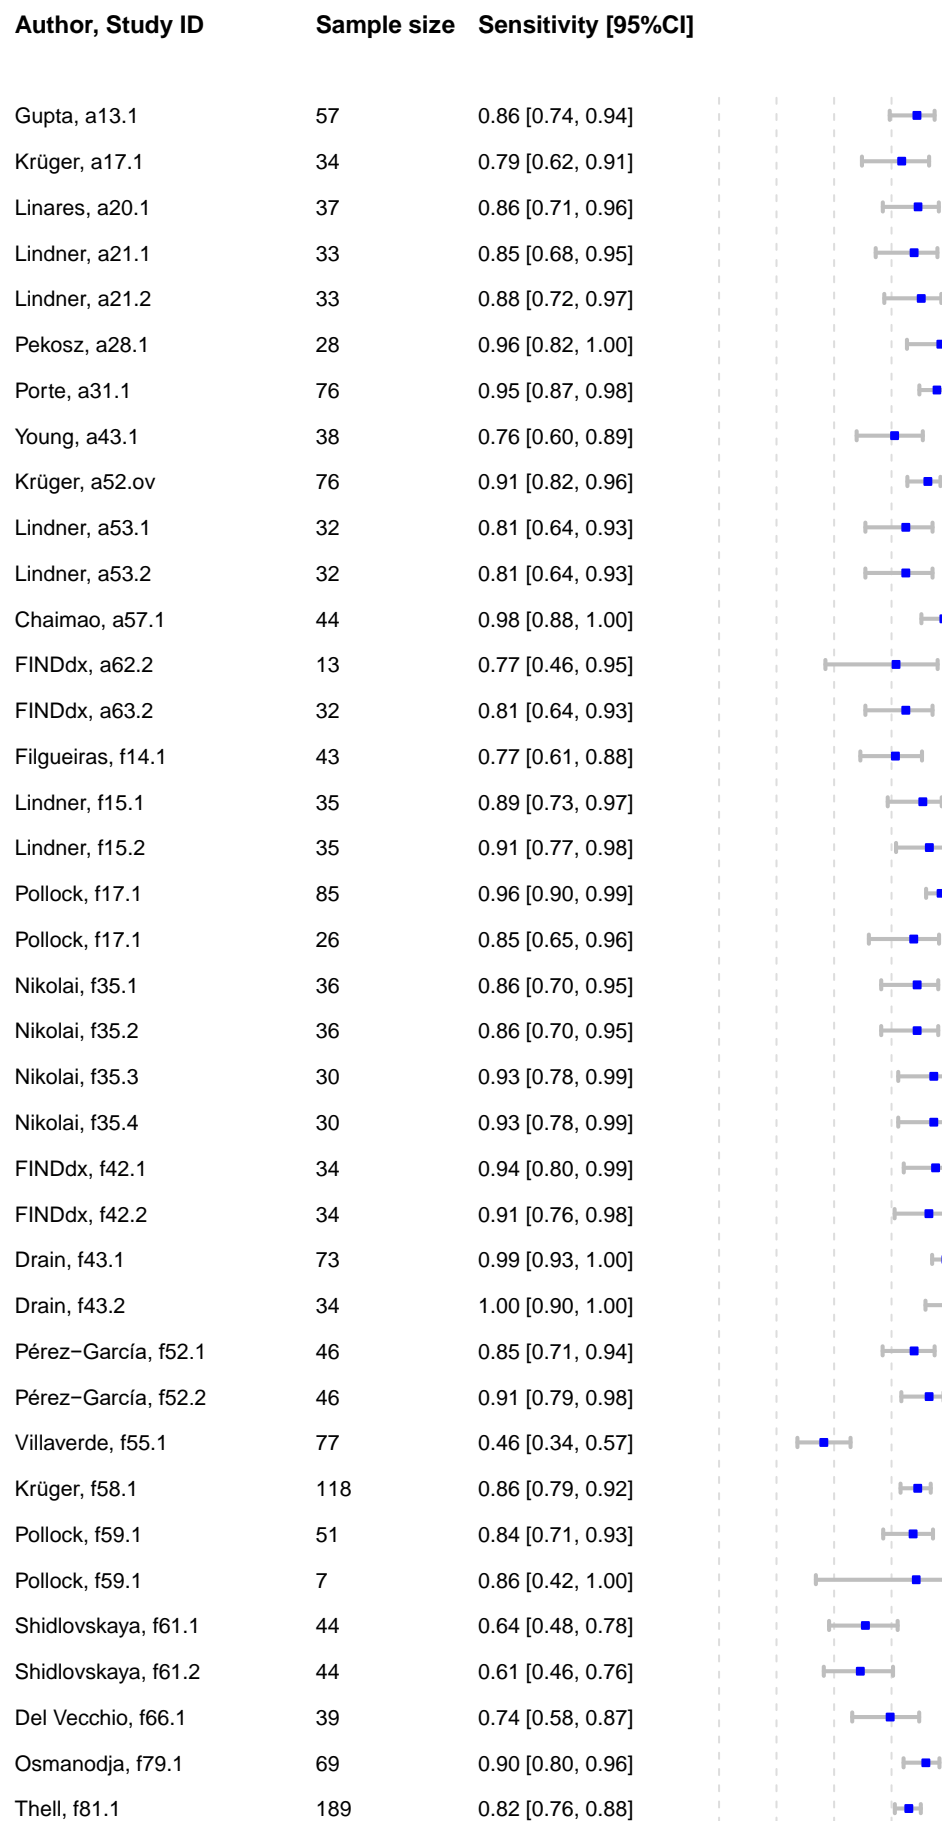

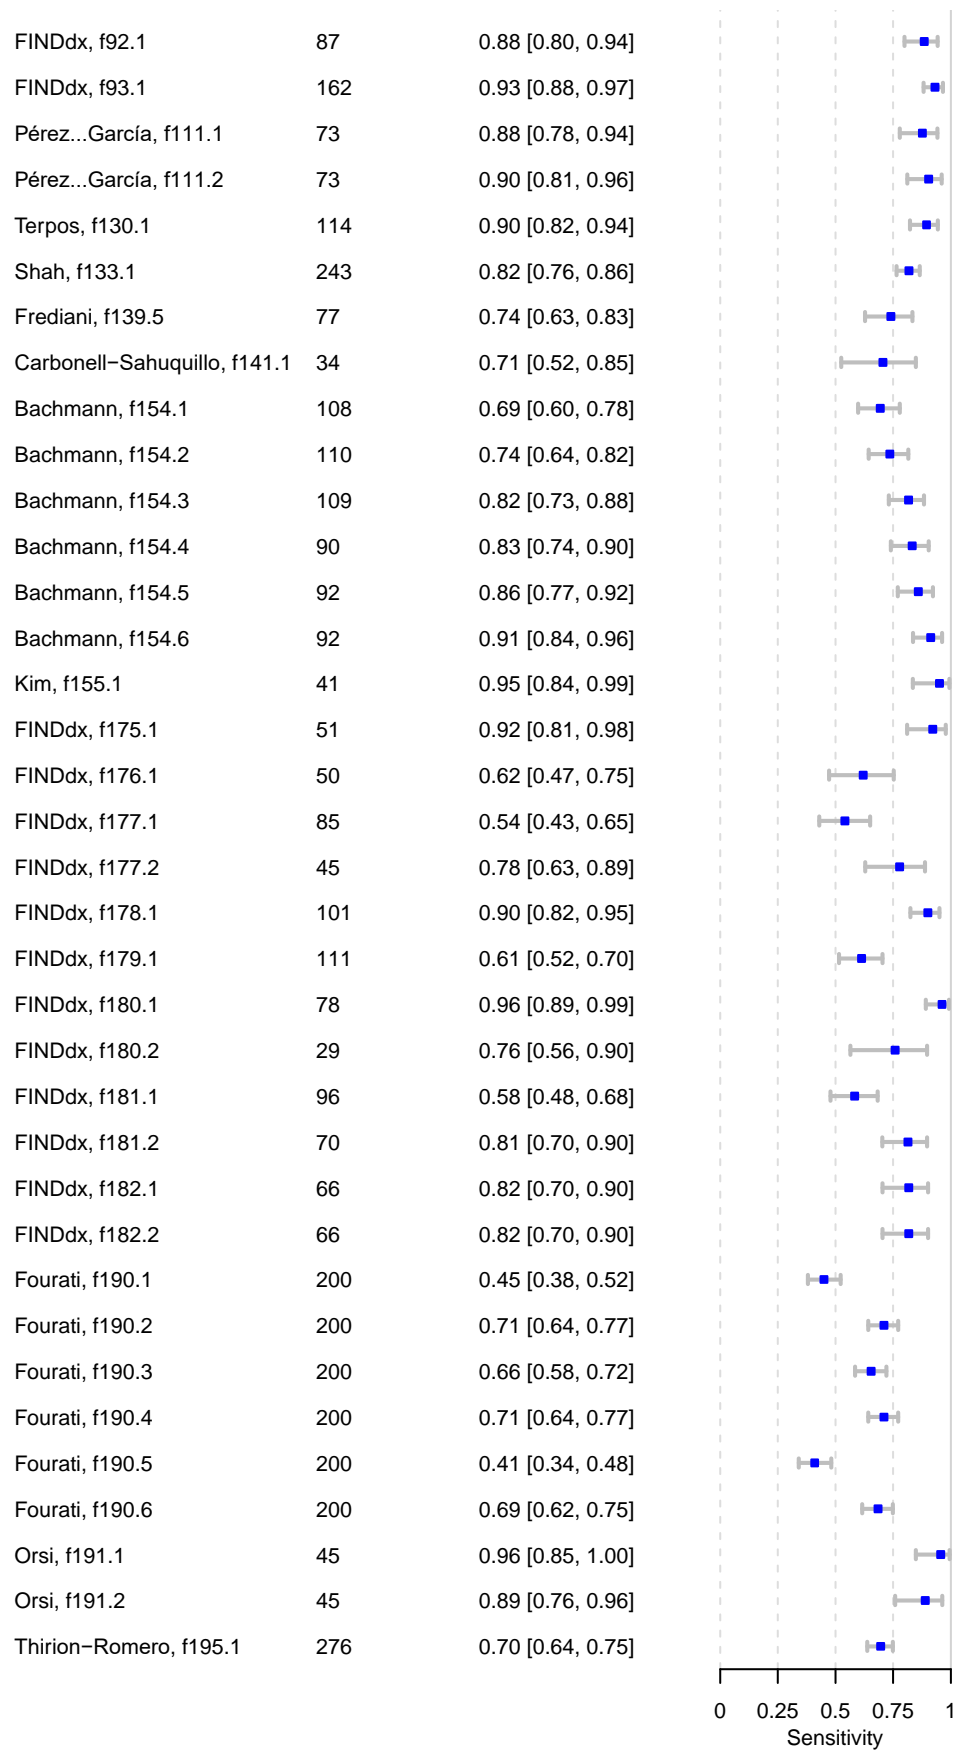

Supplement: pmed.1004011.s008.pdf [file pmed.1004011.s008.pdf]
