# Supplementary material for: Accuracy of rapid point-of-care antigen-based diagnostics for SARS-CoV-2: An updated systematic review and meta-analysis with meta-regression analyzing influencing factors
Source: PubMed Central journal article supplement (PMC9187092; doi:10.1371/journal.pmed.1004011), 2022-05-26

S9 Fig. Forest plots for subgroup analysis by mean Ct-values for TP and FN samples

Caption: CI = confidence interval

Figure A – Forest plots of mean Ct-value for true positive samples

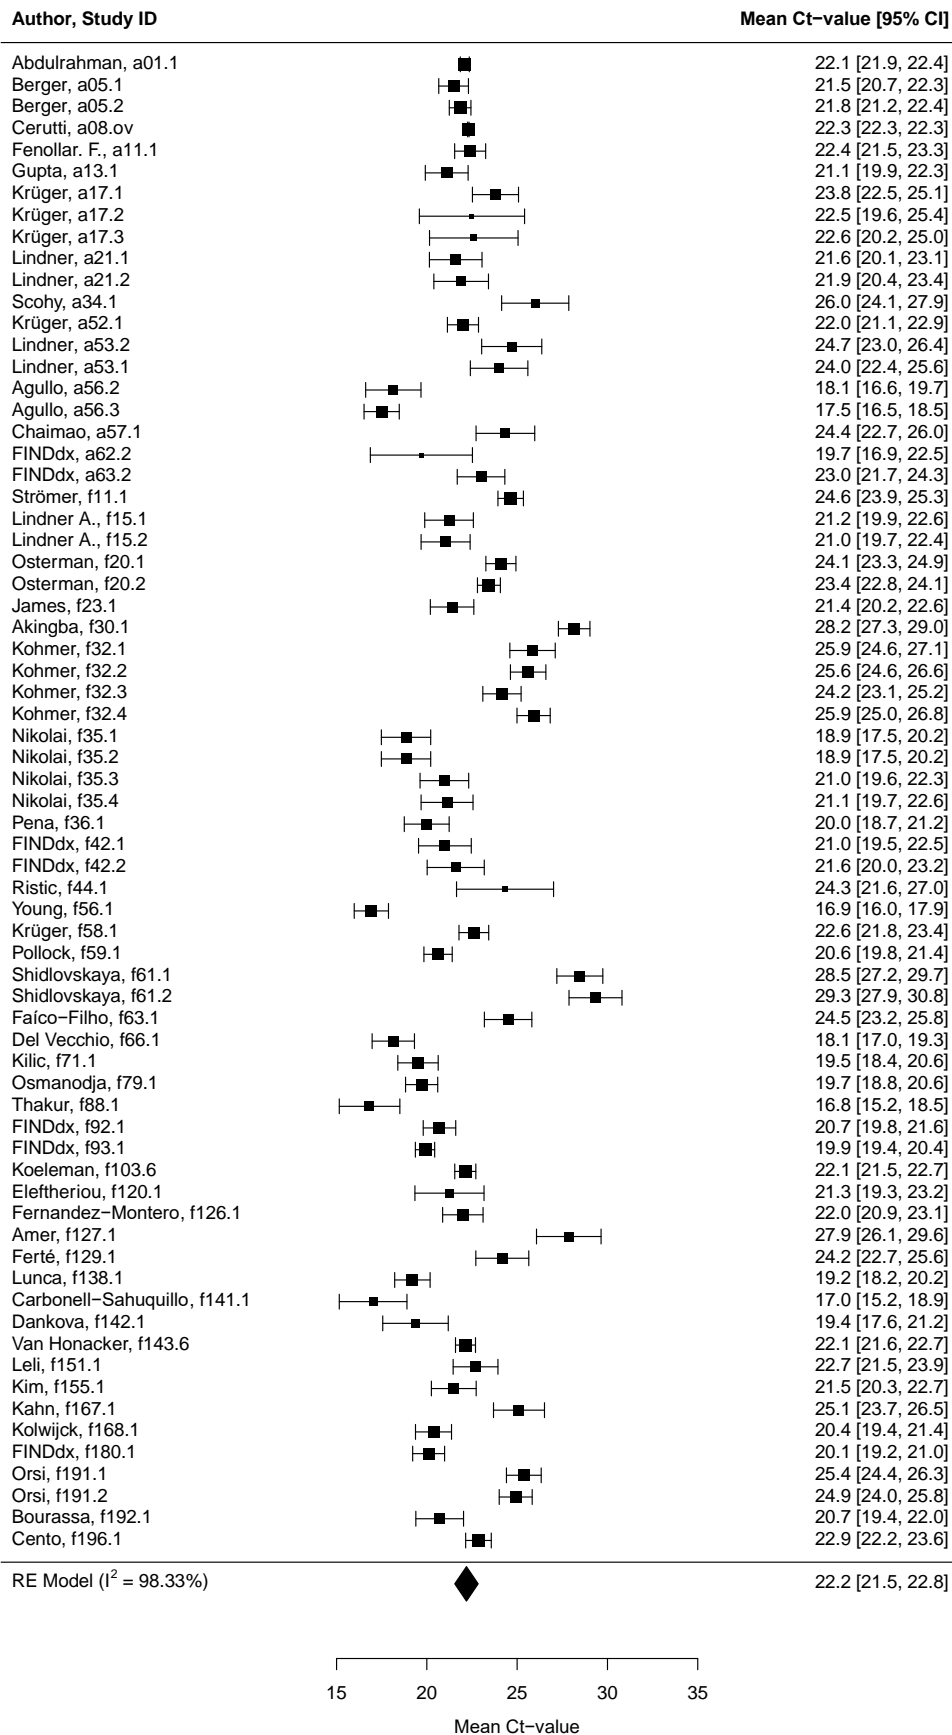

Figure B – Forest plots of mean Ct-value for false negative samples

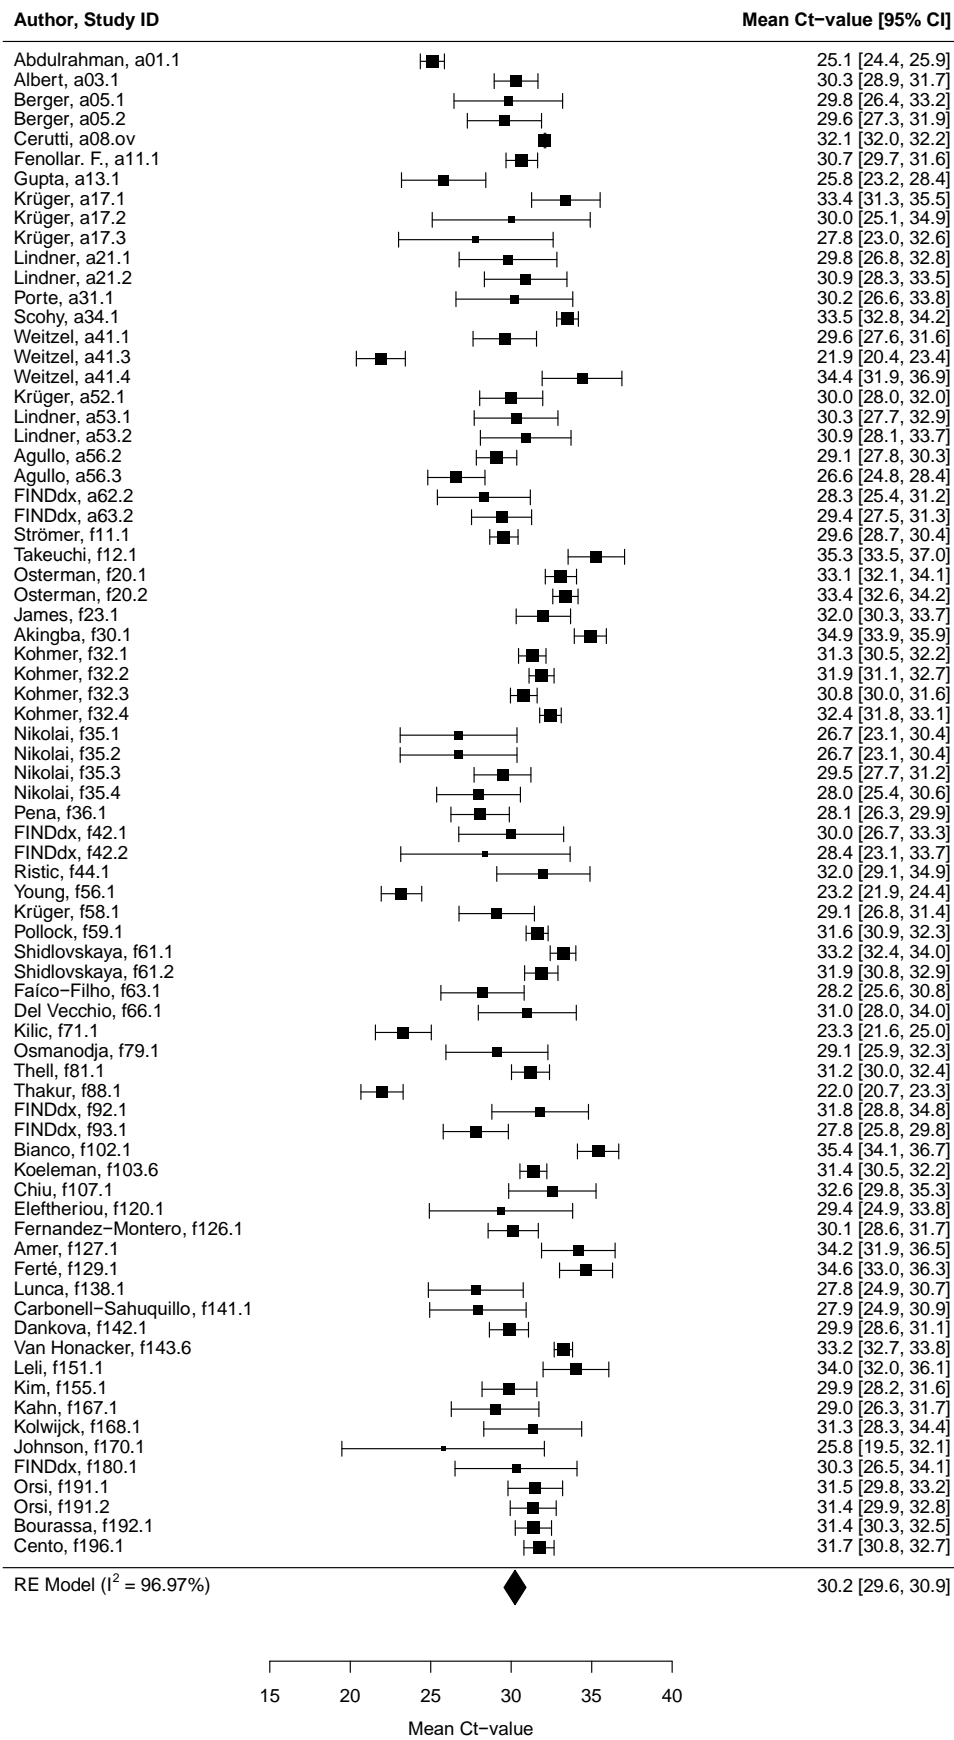

Supplement: pmed.1004011.s010.pdf [file pmed.1004011.s010.pdf]
