# Supplementary material for: Accuracy of rapid point-of-care antigen-based diagnostics for SARS-CoV-2: An updated systematic review and meta-analysis with meta-regression analyzing influencing factors
Source: PubMed Central journal article supplement (PMC9187092; doi:10.1371/journal.pmed.1004011), 2022-05-26

S10 Fig. HSROC curve Standard Q nasal and LumiraDx Ag-RDT

Caption: HSROC = Hierarchical summary receiver-operating characteristic

Fig A – HSROC curve Standard Q nasal

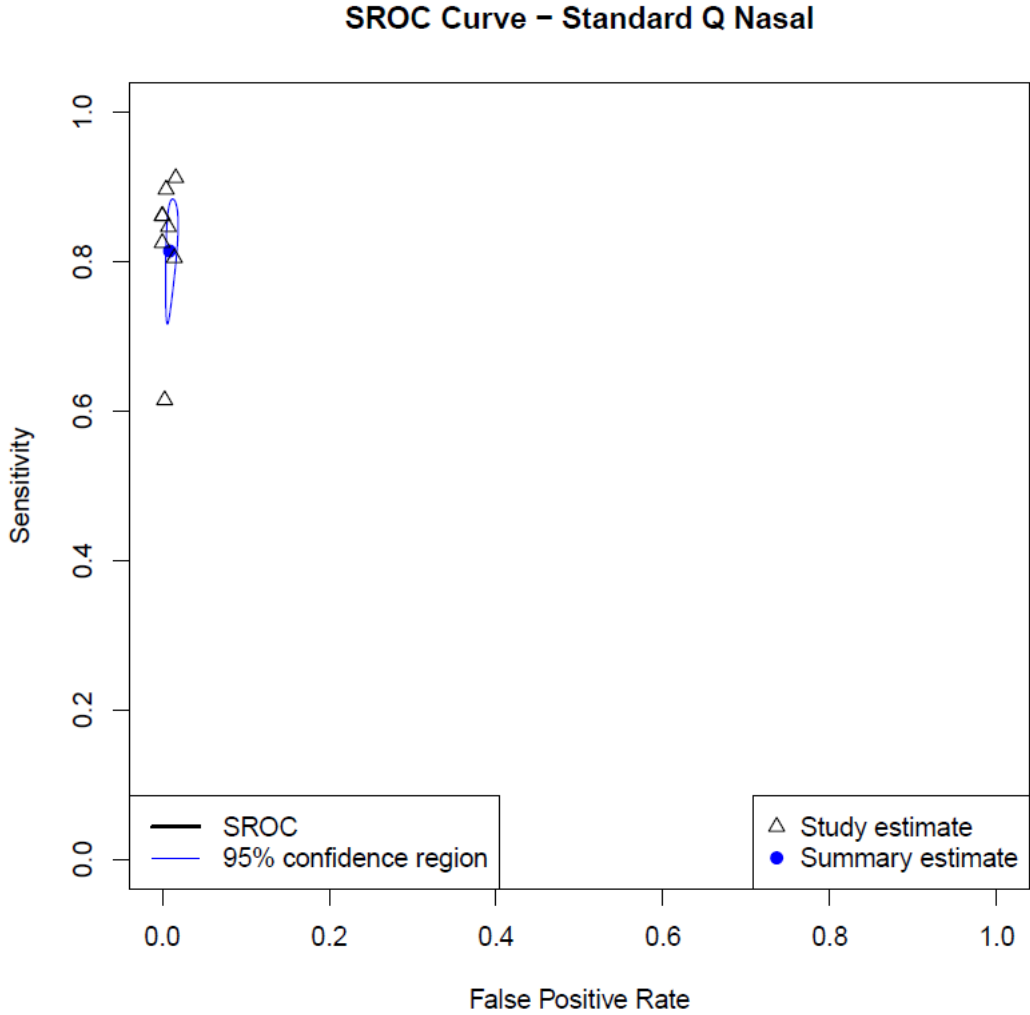

Fig B – HSROC curve LumiraDx

SROC Curve – LumiraDx

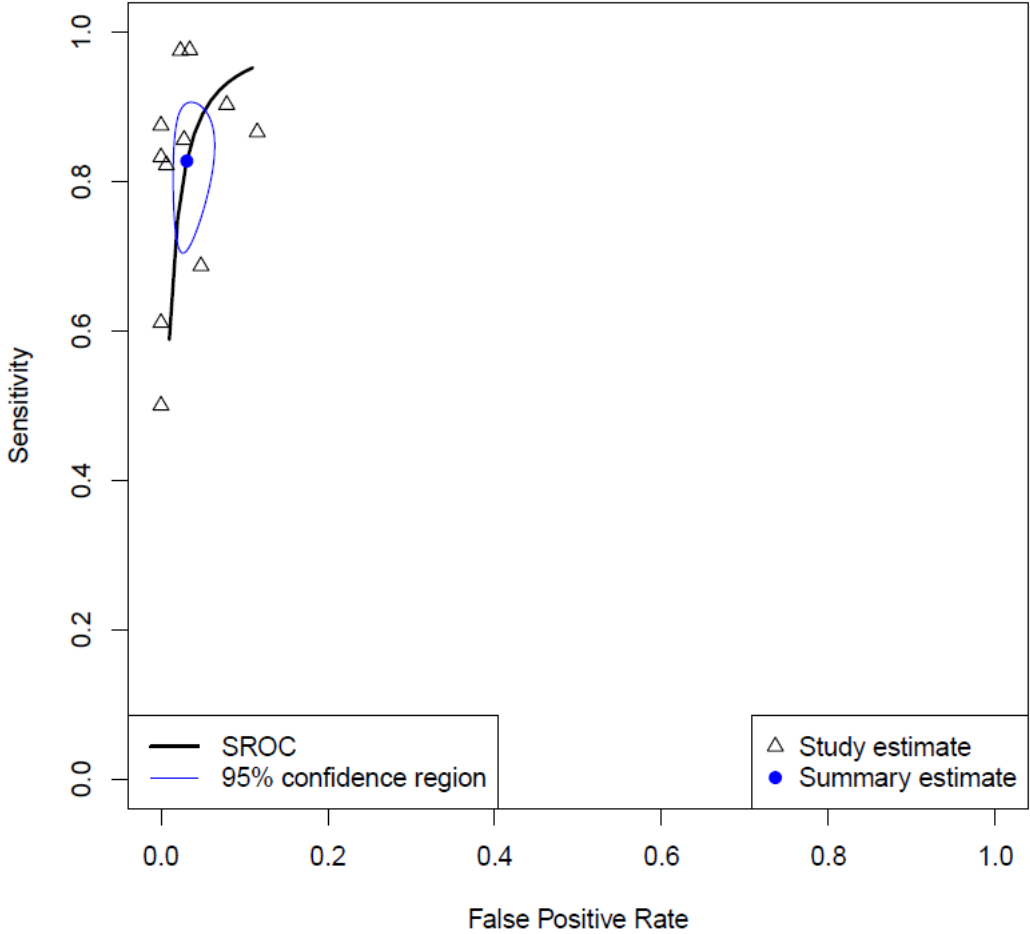

Supplement: pmed.1004011.s011.pdf [file pmed.1004011.s011.pdf]
