# Supplementary material for: Accuracy of rapid point-of-care antigen-based diagnostics for SARS-CoV-2: An updated systematic review and meta-analysis with meta-regression analyzing influencing factors
Source: PubMed Central journal article supplement (PMC9187092; doi:10.1371/journal.pmed.1004011), 2022-05-26

S11 Fig. Forest plot for univariate analysis for Nadal and SureScreen V

Caption: CI = confidence interval

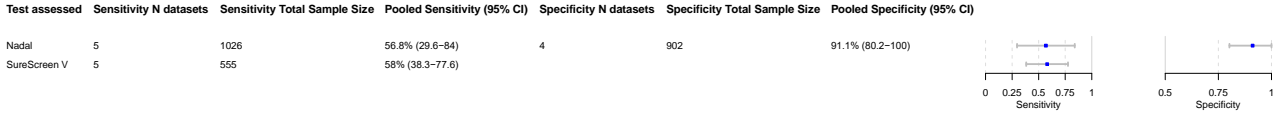

Supplement: pmed.1004011.s012.pdf [file pmed.1004011.s012.pdf]
