# Supplementary material for: Accuracy of rapid point-of-care antigen-based diagnostics for SARS-CoV-2: An updated systematic review and meta-analysis with meta-regression analyzing influencing factors
Source: PubMed Central journal article supplement (PMC9187092; doi:10.1371/journal.pmed.1004011), 2022-05-26

S12 Fig. a Funnel plot for all studies

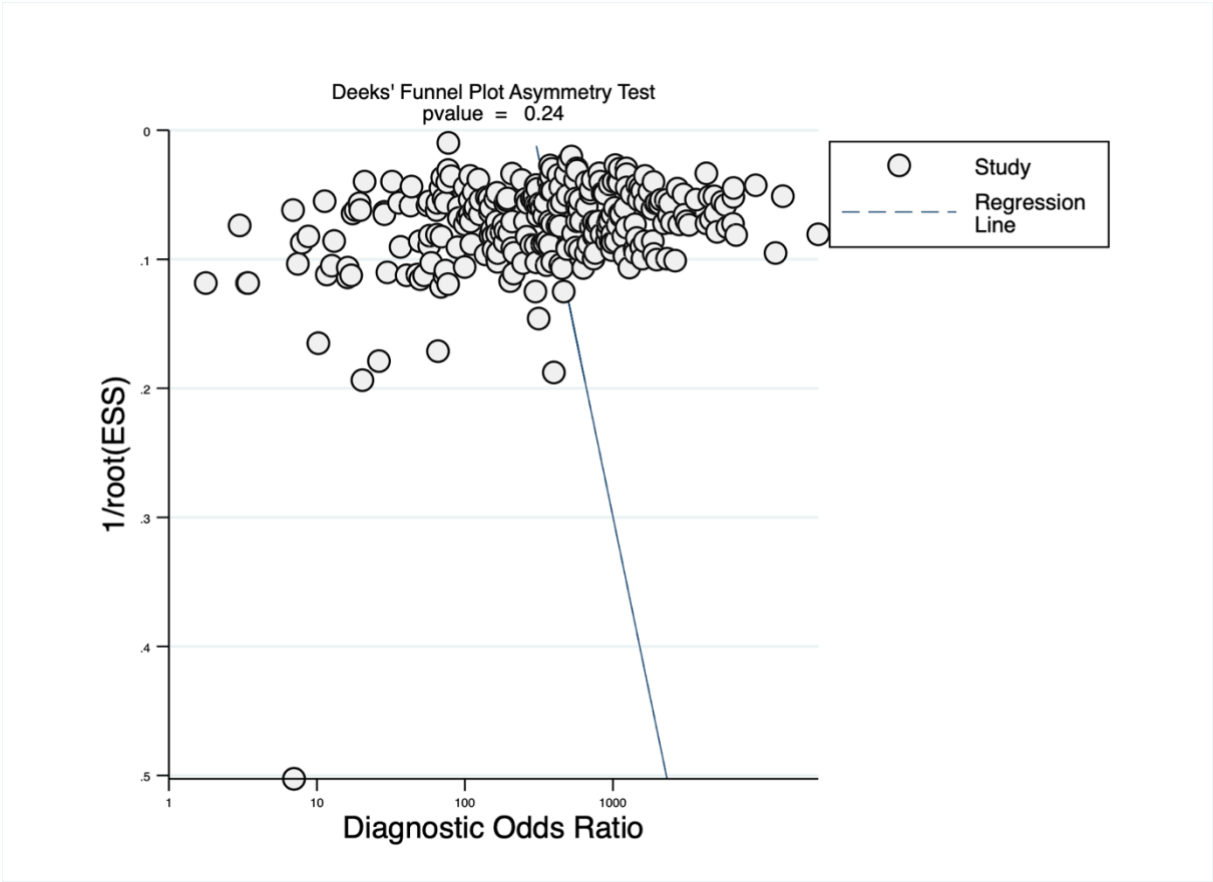

S12 Fig. b Funnel plot for LumiraDx studies

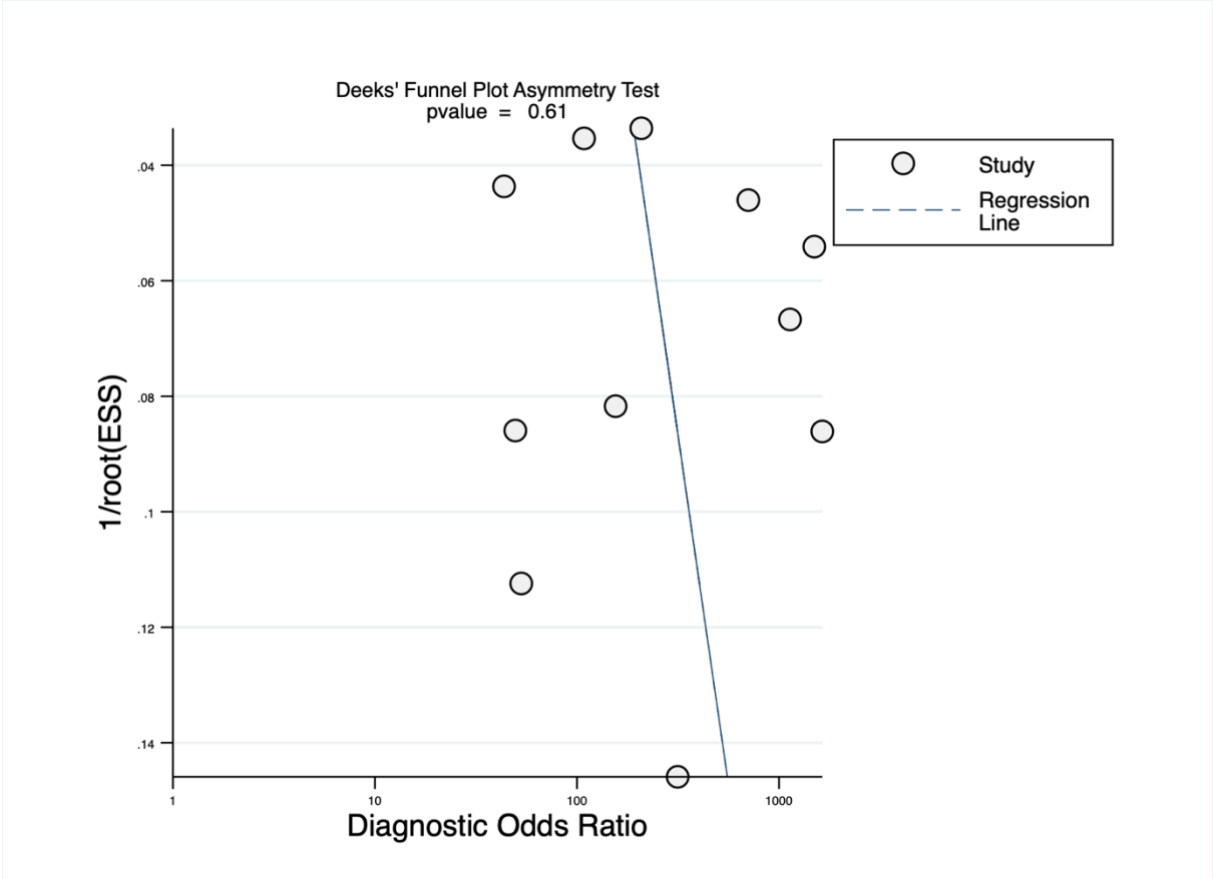

S12 Fig. c Funnel plot for Panbio studies

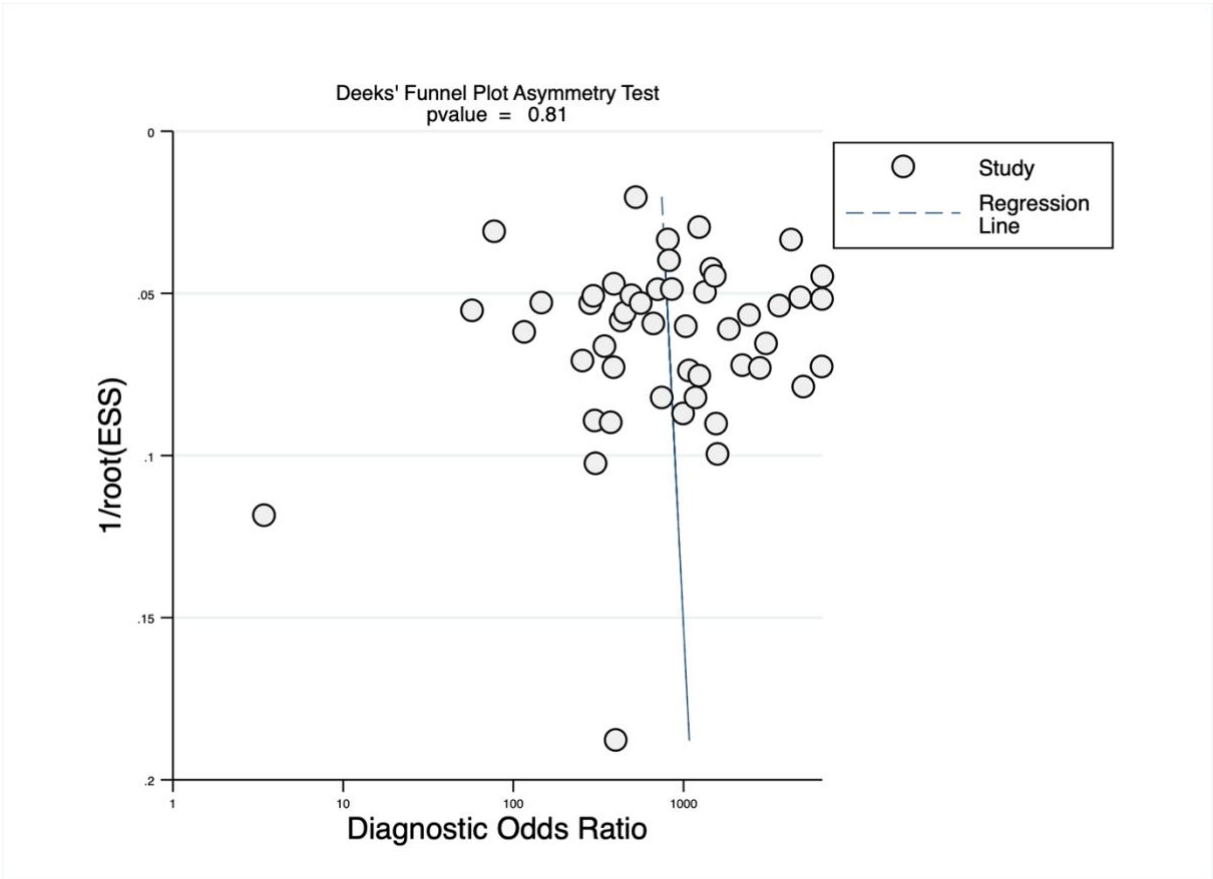

Supplement: pmed.1004011.s013.pdf [file pmed.1004011.s013.pdf]
